# Supplementary material for: Marine bacterial exopolysaccharide EPS11 inhibits migration and invasion of liver cancer cells by directly targeting collagen I
Source: PubMed Central journal article supplement — J Biol Chem. 2021 Aug 28;297(4):101133. doi: 10.1016/j.jbc.2021.101133 (PMC8449266; doi:10.1016/j.jbc.2021.101133), 2021-08-28

| Raw file | Scan number | Mass analyzer | Score  | m/z      | Proteins |
|----------|-------------|---------------|--------|----------|----------|
| 7610TQ_9 | 16181       | FTMS          | 156.17 | 700.3932 | O00505   |

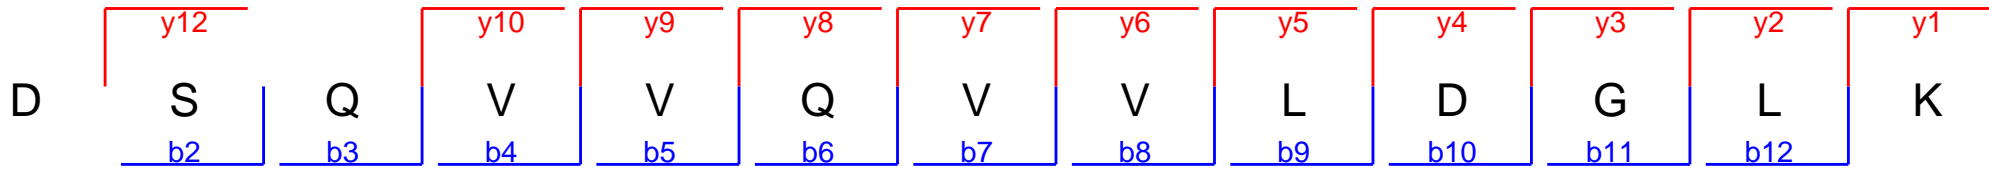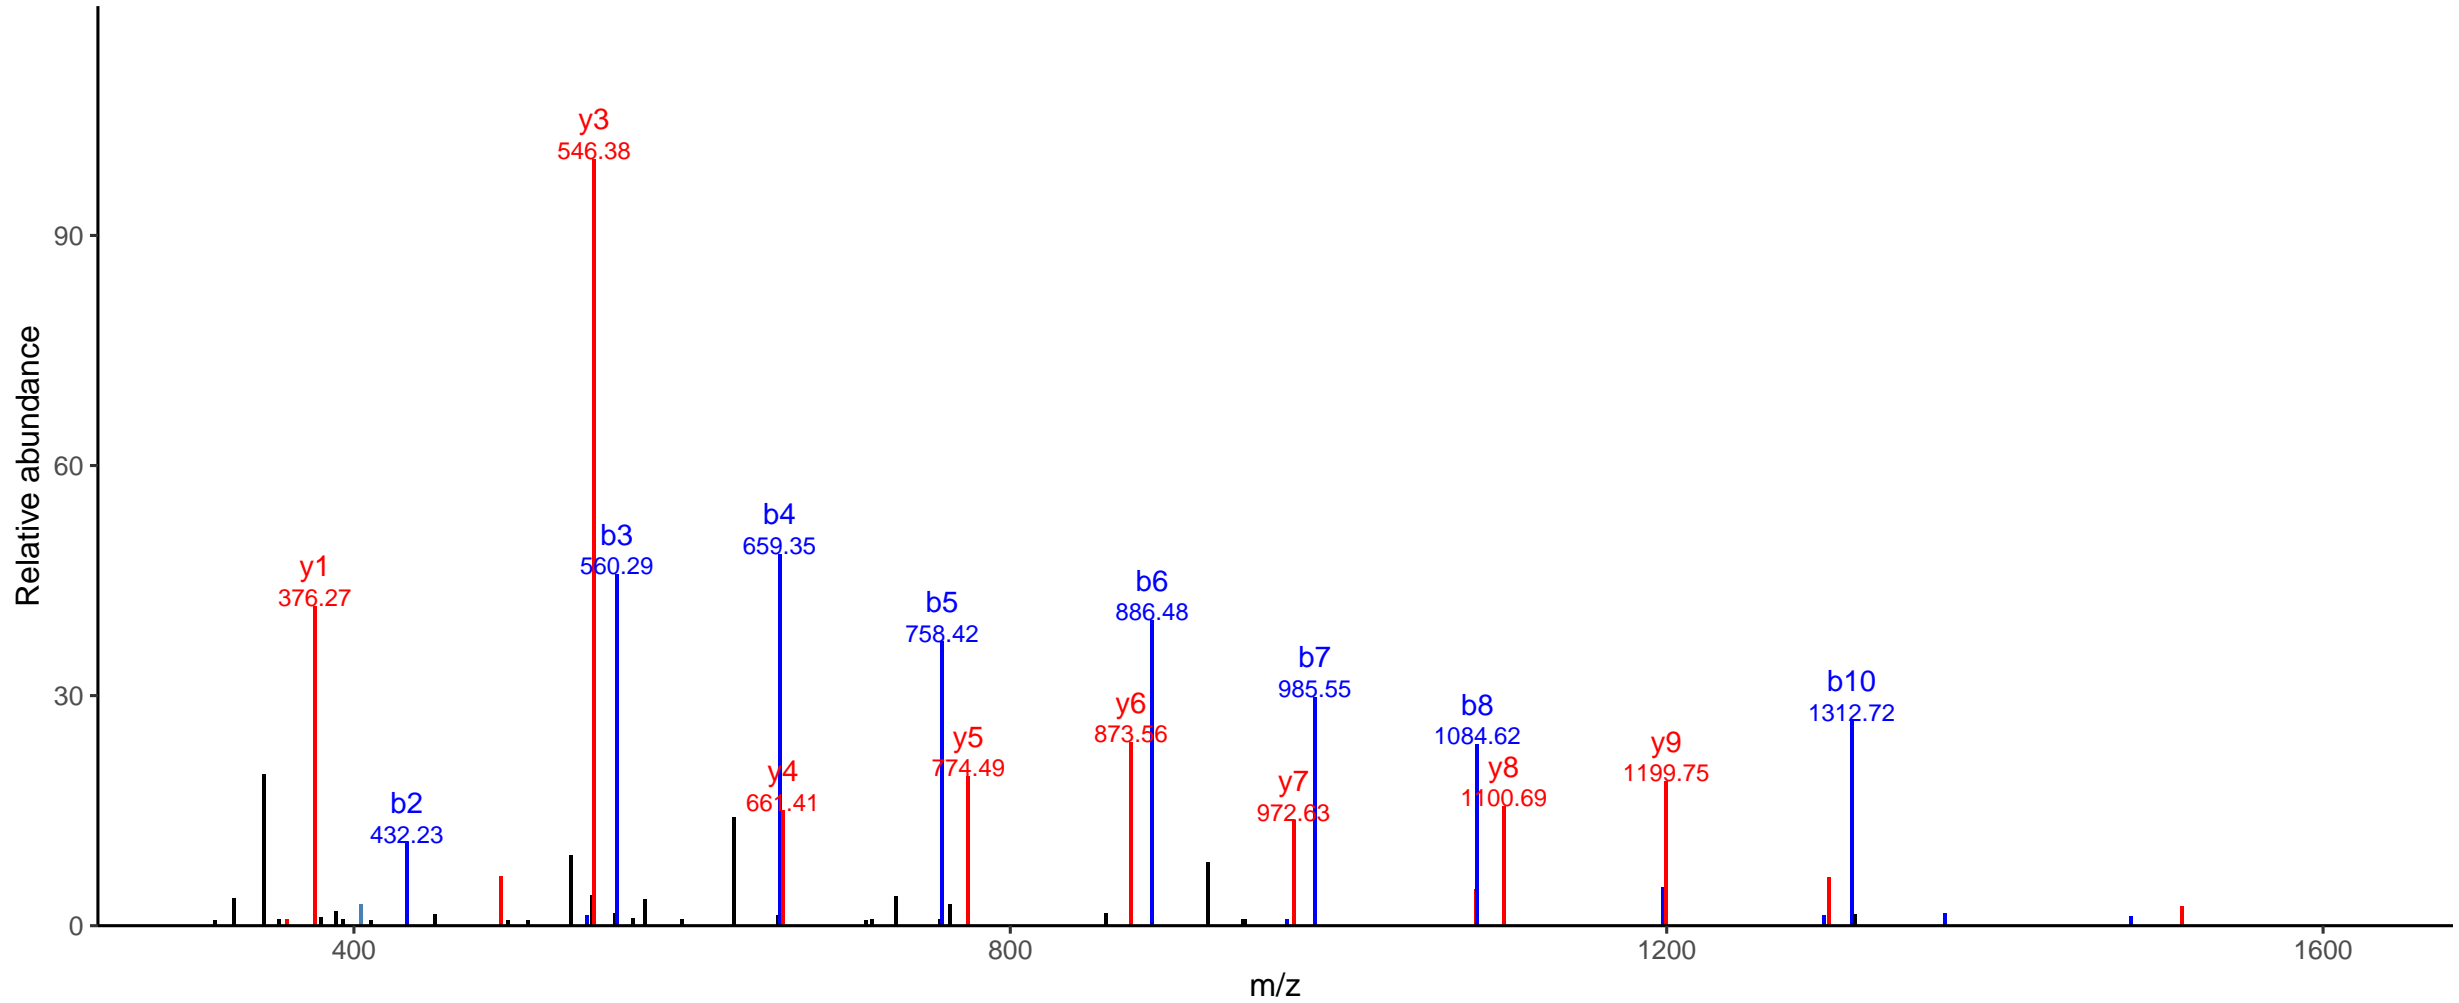

| Raw file  | Scan number | Mass analyzer | Score  | m/z      | Proteins |
|-----------|-------------|---------------|--------|----------|----------|
| 7610TQ_18 | 1915        | FTMS          | 72.325 | 614.7074 | O14894   |

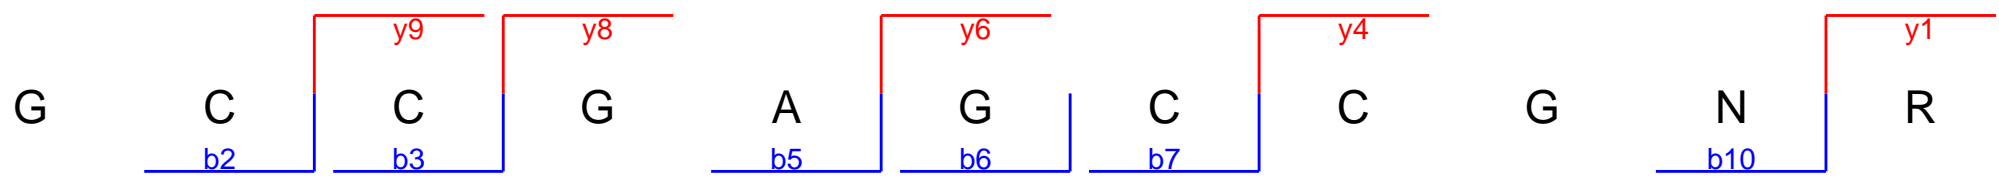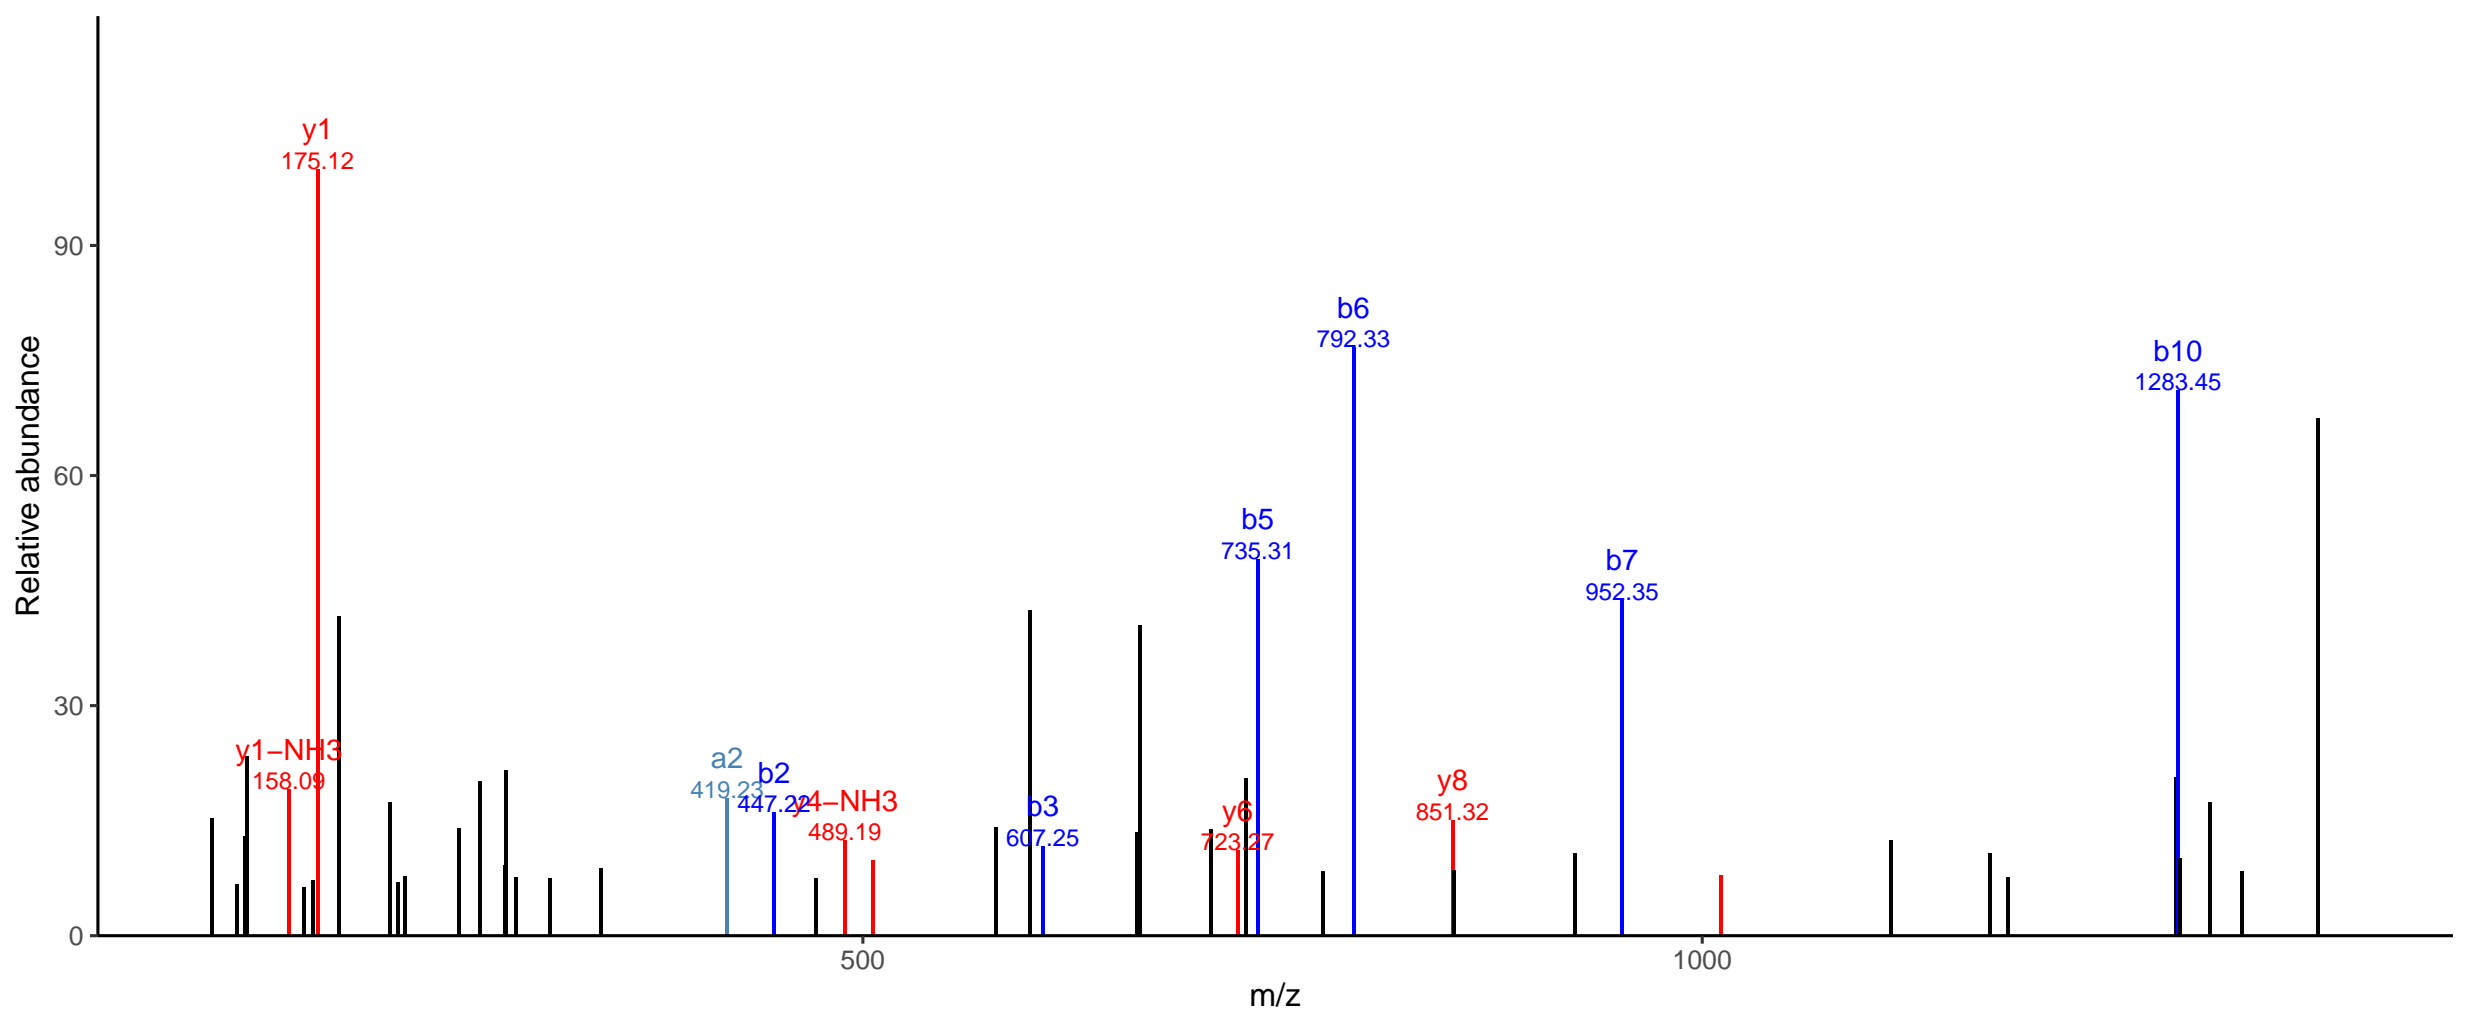

| Raw file | Scan number | Mass analyzer | Score  | m/z      | Proteins |
|----------|-------------|---------------|--------|----------|----------|
| 7610TQ_3 | 13207       | FTMS          | 116.24 | 1267.657 | O60361   |

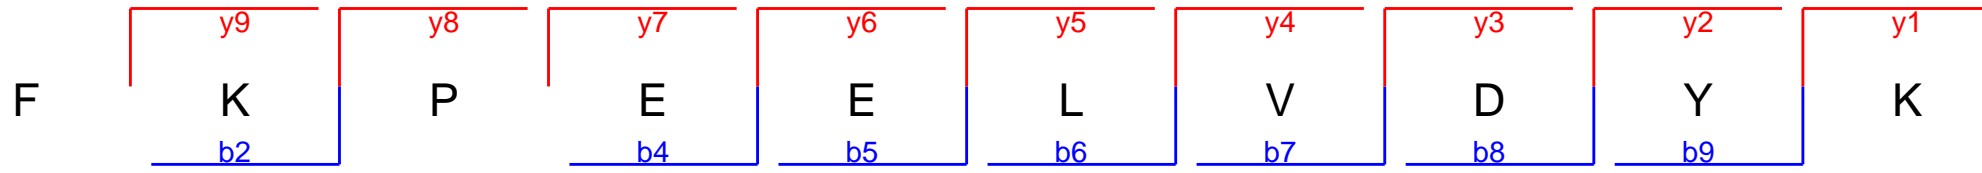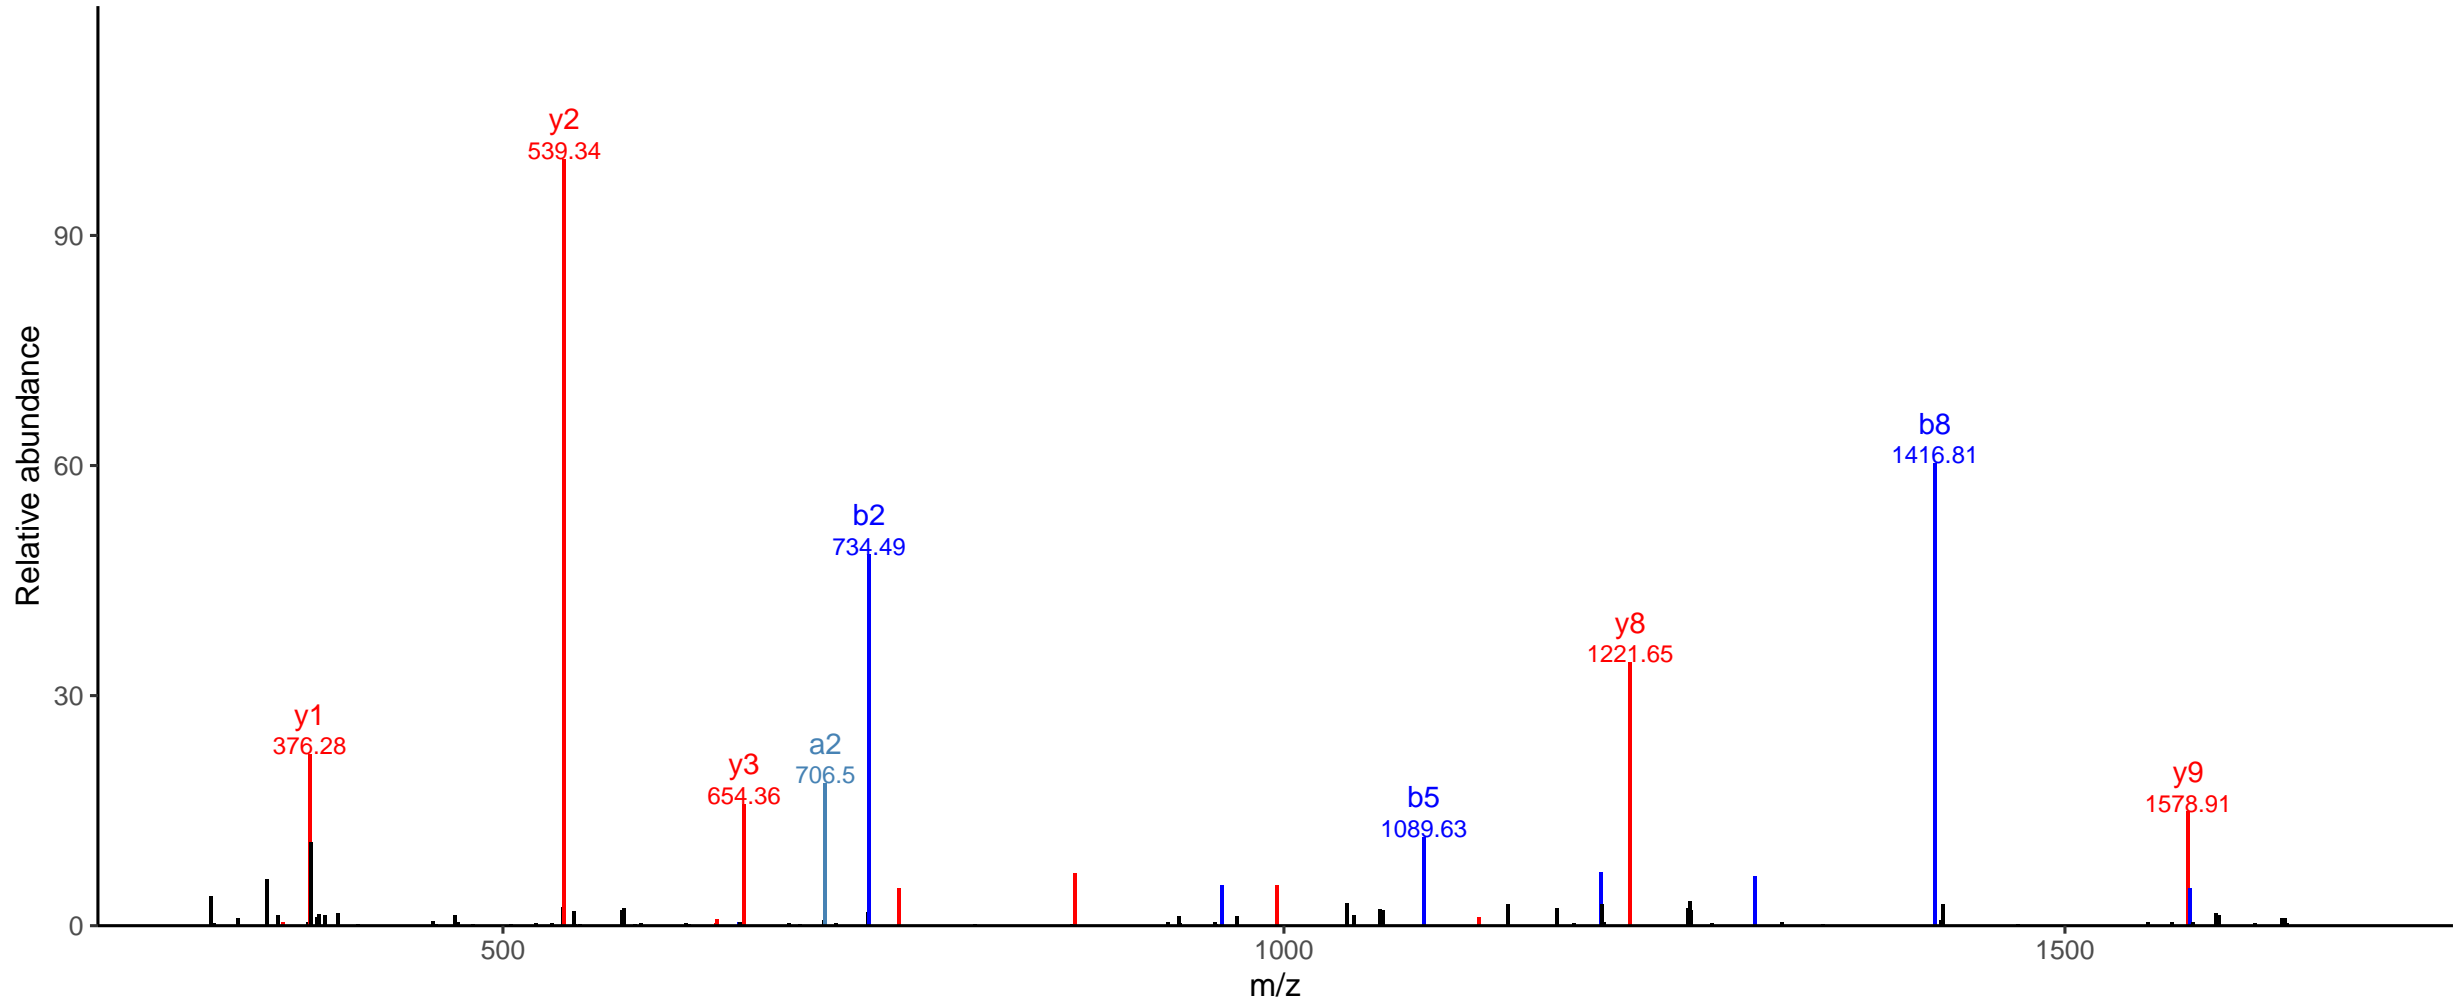

| Raw file | Scan number | Mass analyzer | Score  | m/z      | Proteins |
|----------|-------------|---------------|--------|----------|----------|
| 7610TQ_6 | 14795       | FTMS          | 123.29 | 743.3481 | O95183   |

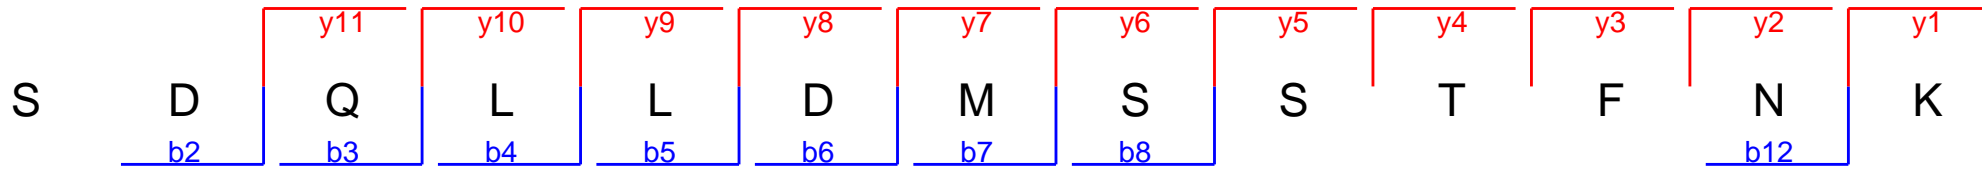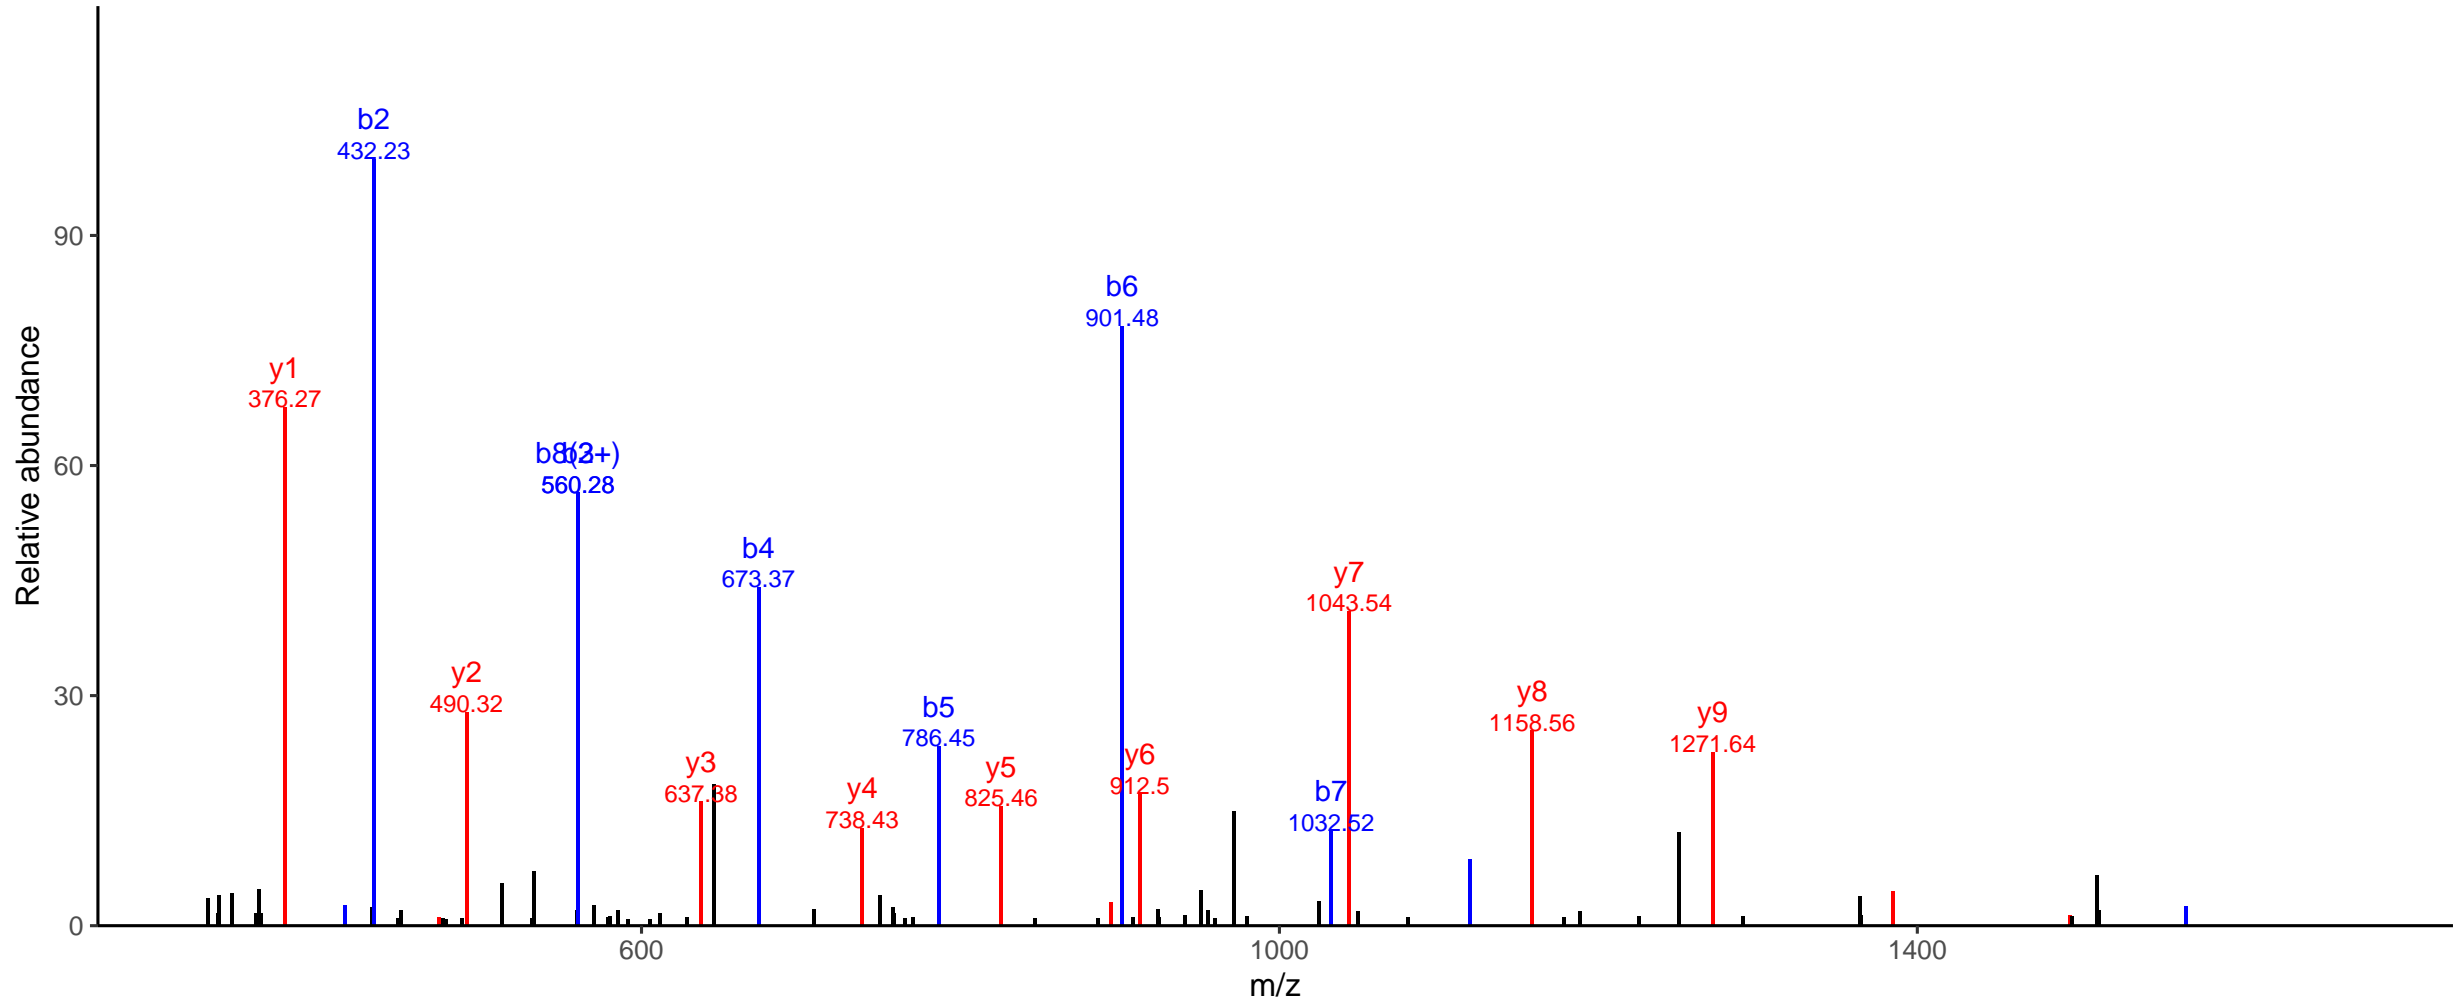

| Raw file | Scan number | Mass analyzer | Score  | m/z      | Proteins |
|----------|-------------|---------------|--------|----------|----------|
| 7610TQ_4 | 16257       | FTMS          | 124.62 | 1233.684 | P12236   |

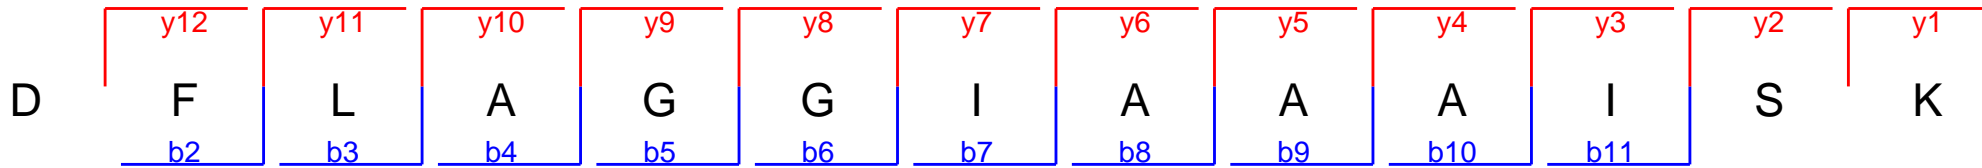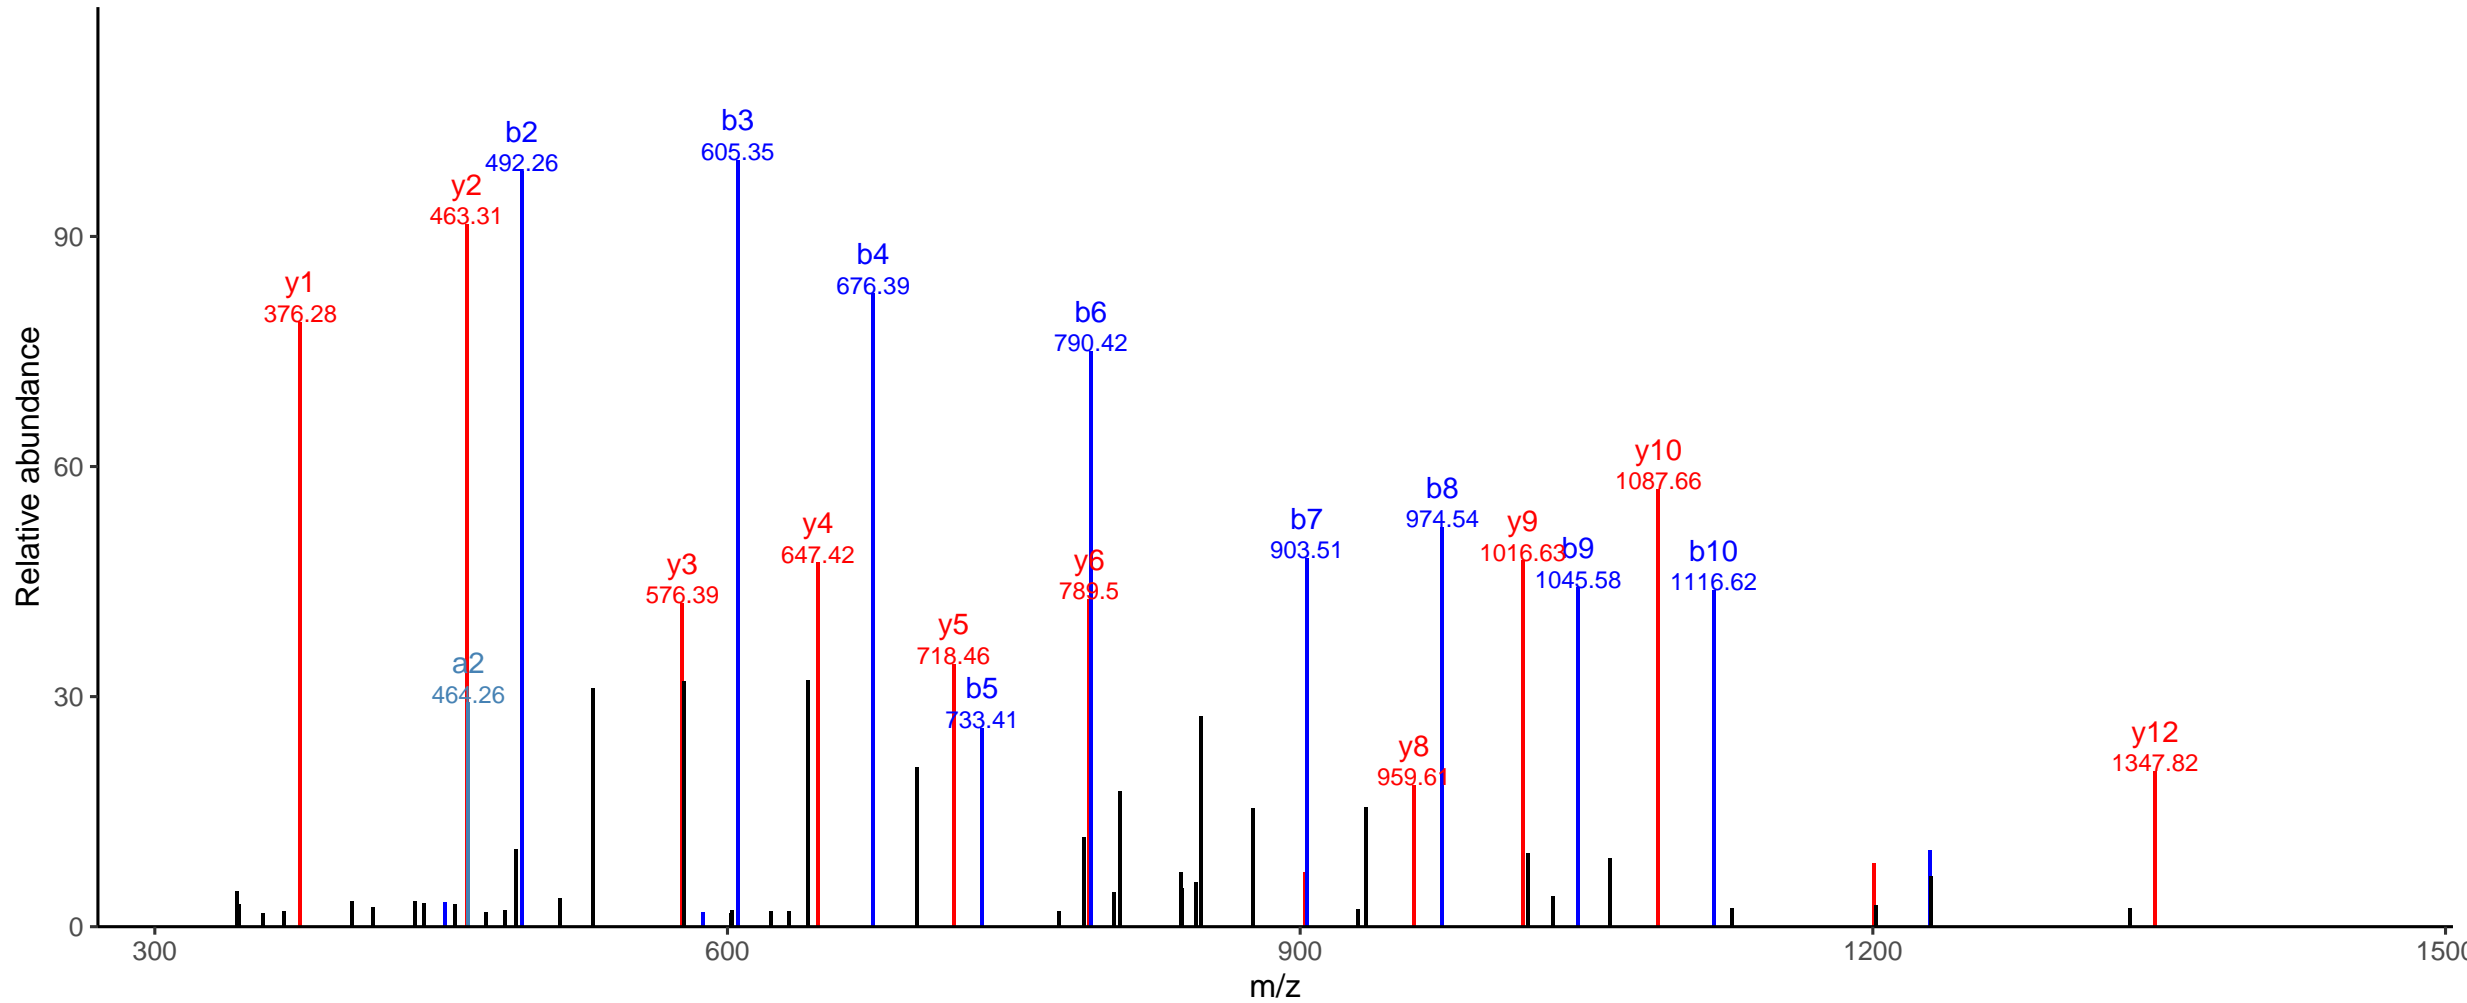

| Raw file | Scan number | Mass analyzer | Score  | m/z      | Proteins |
|----------|-------------|---------------|--------|----------|----------|
| 7610TQ_6 | 3492        | FTMS          | 110.84 | 535.2729 | P14209   |

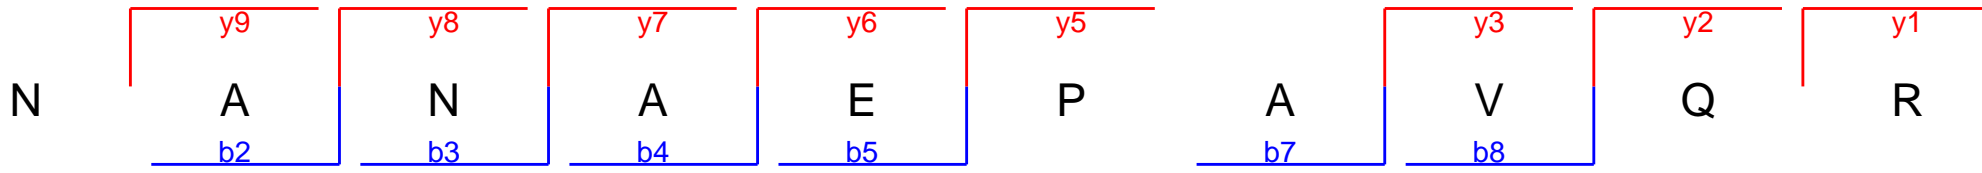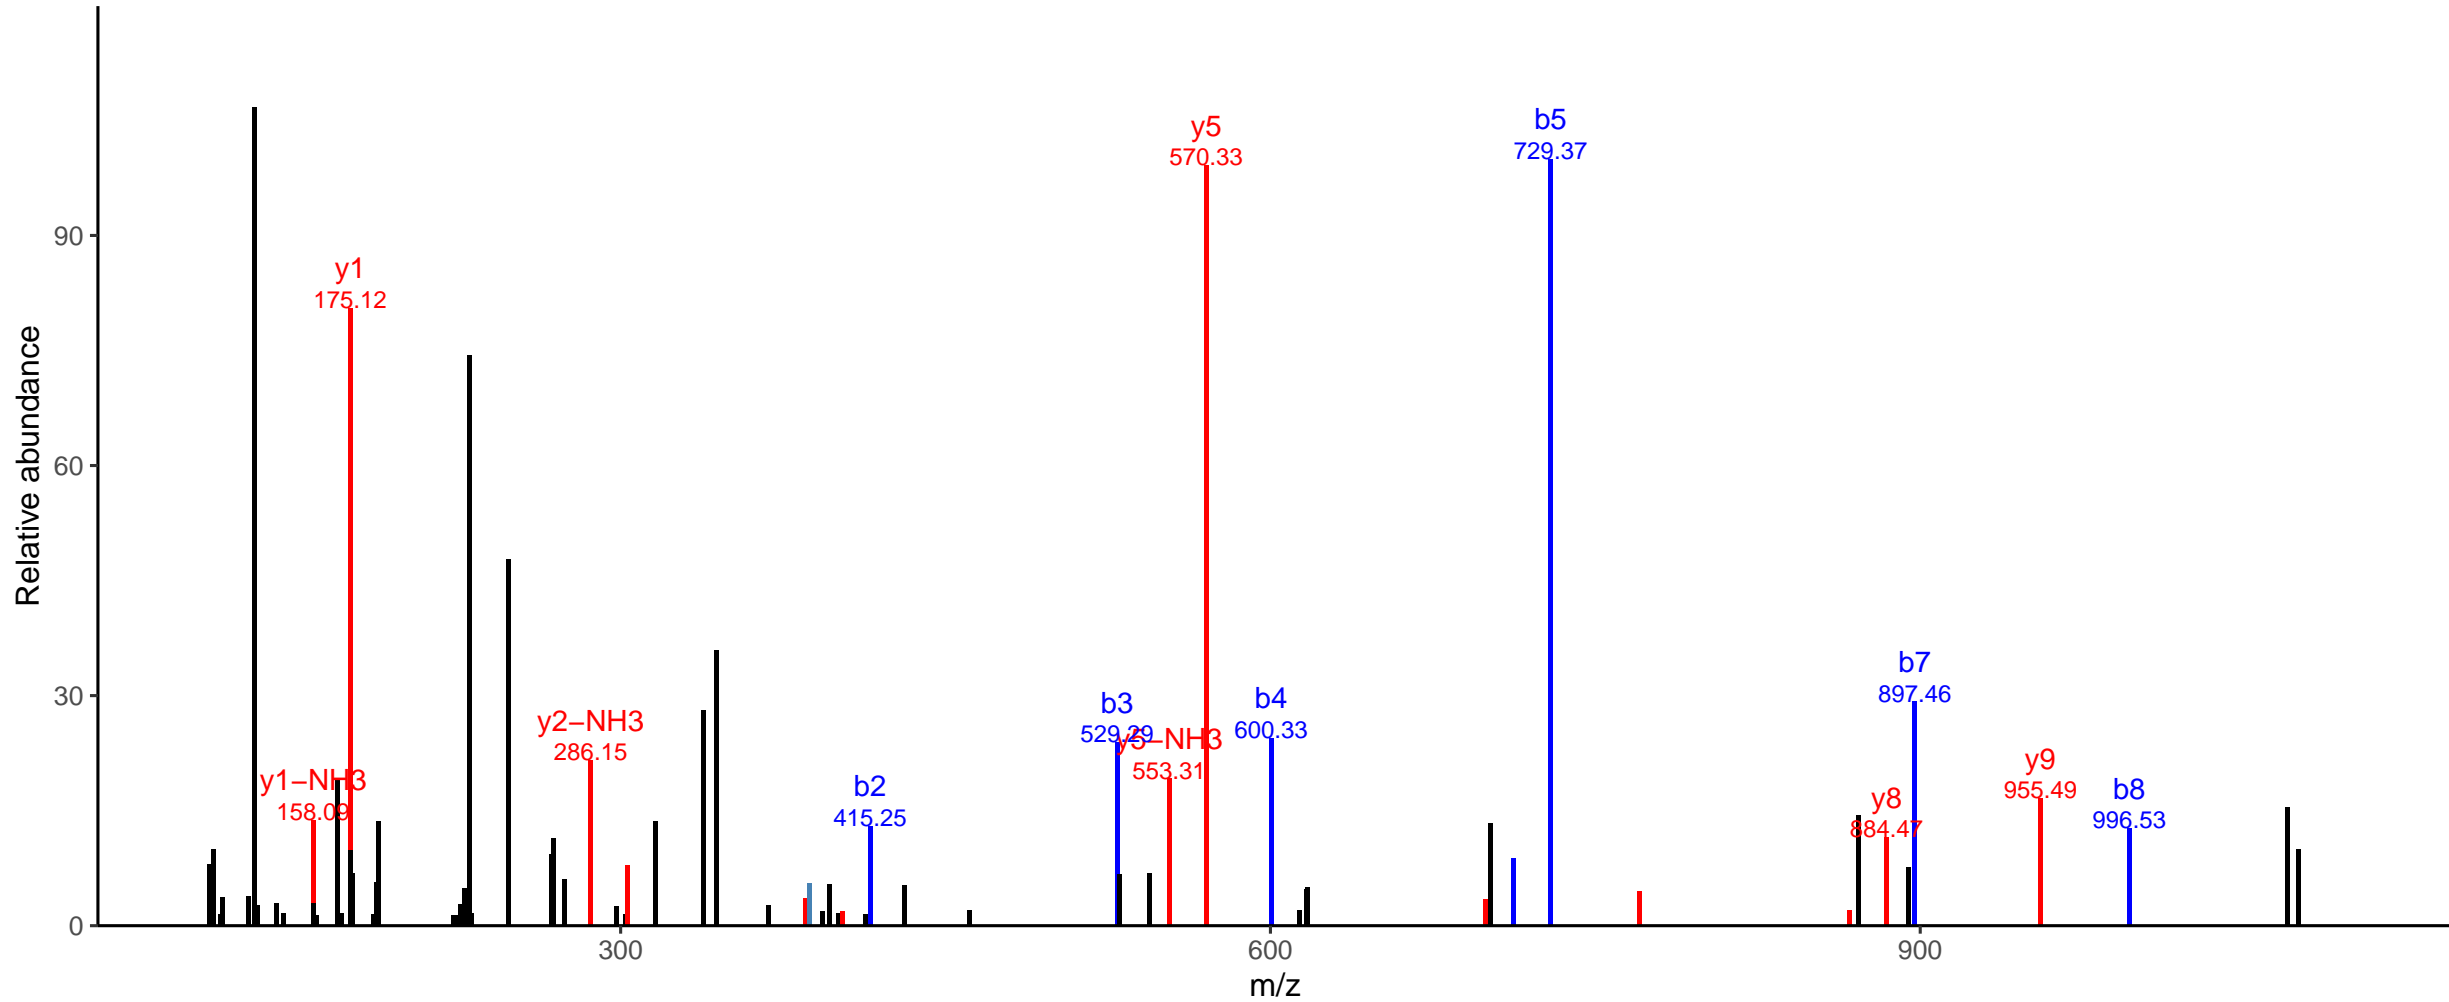

| Raw file  | Scan number | Mass analyzer | Score  | m/z      | Proteins |
|-----------|-------------|---------------|--------|----------|----------|
| 7610TQ_15 | 8834        | FTMS          | 104.11 | 441.7509 | P49356   |

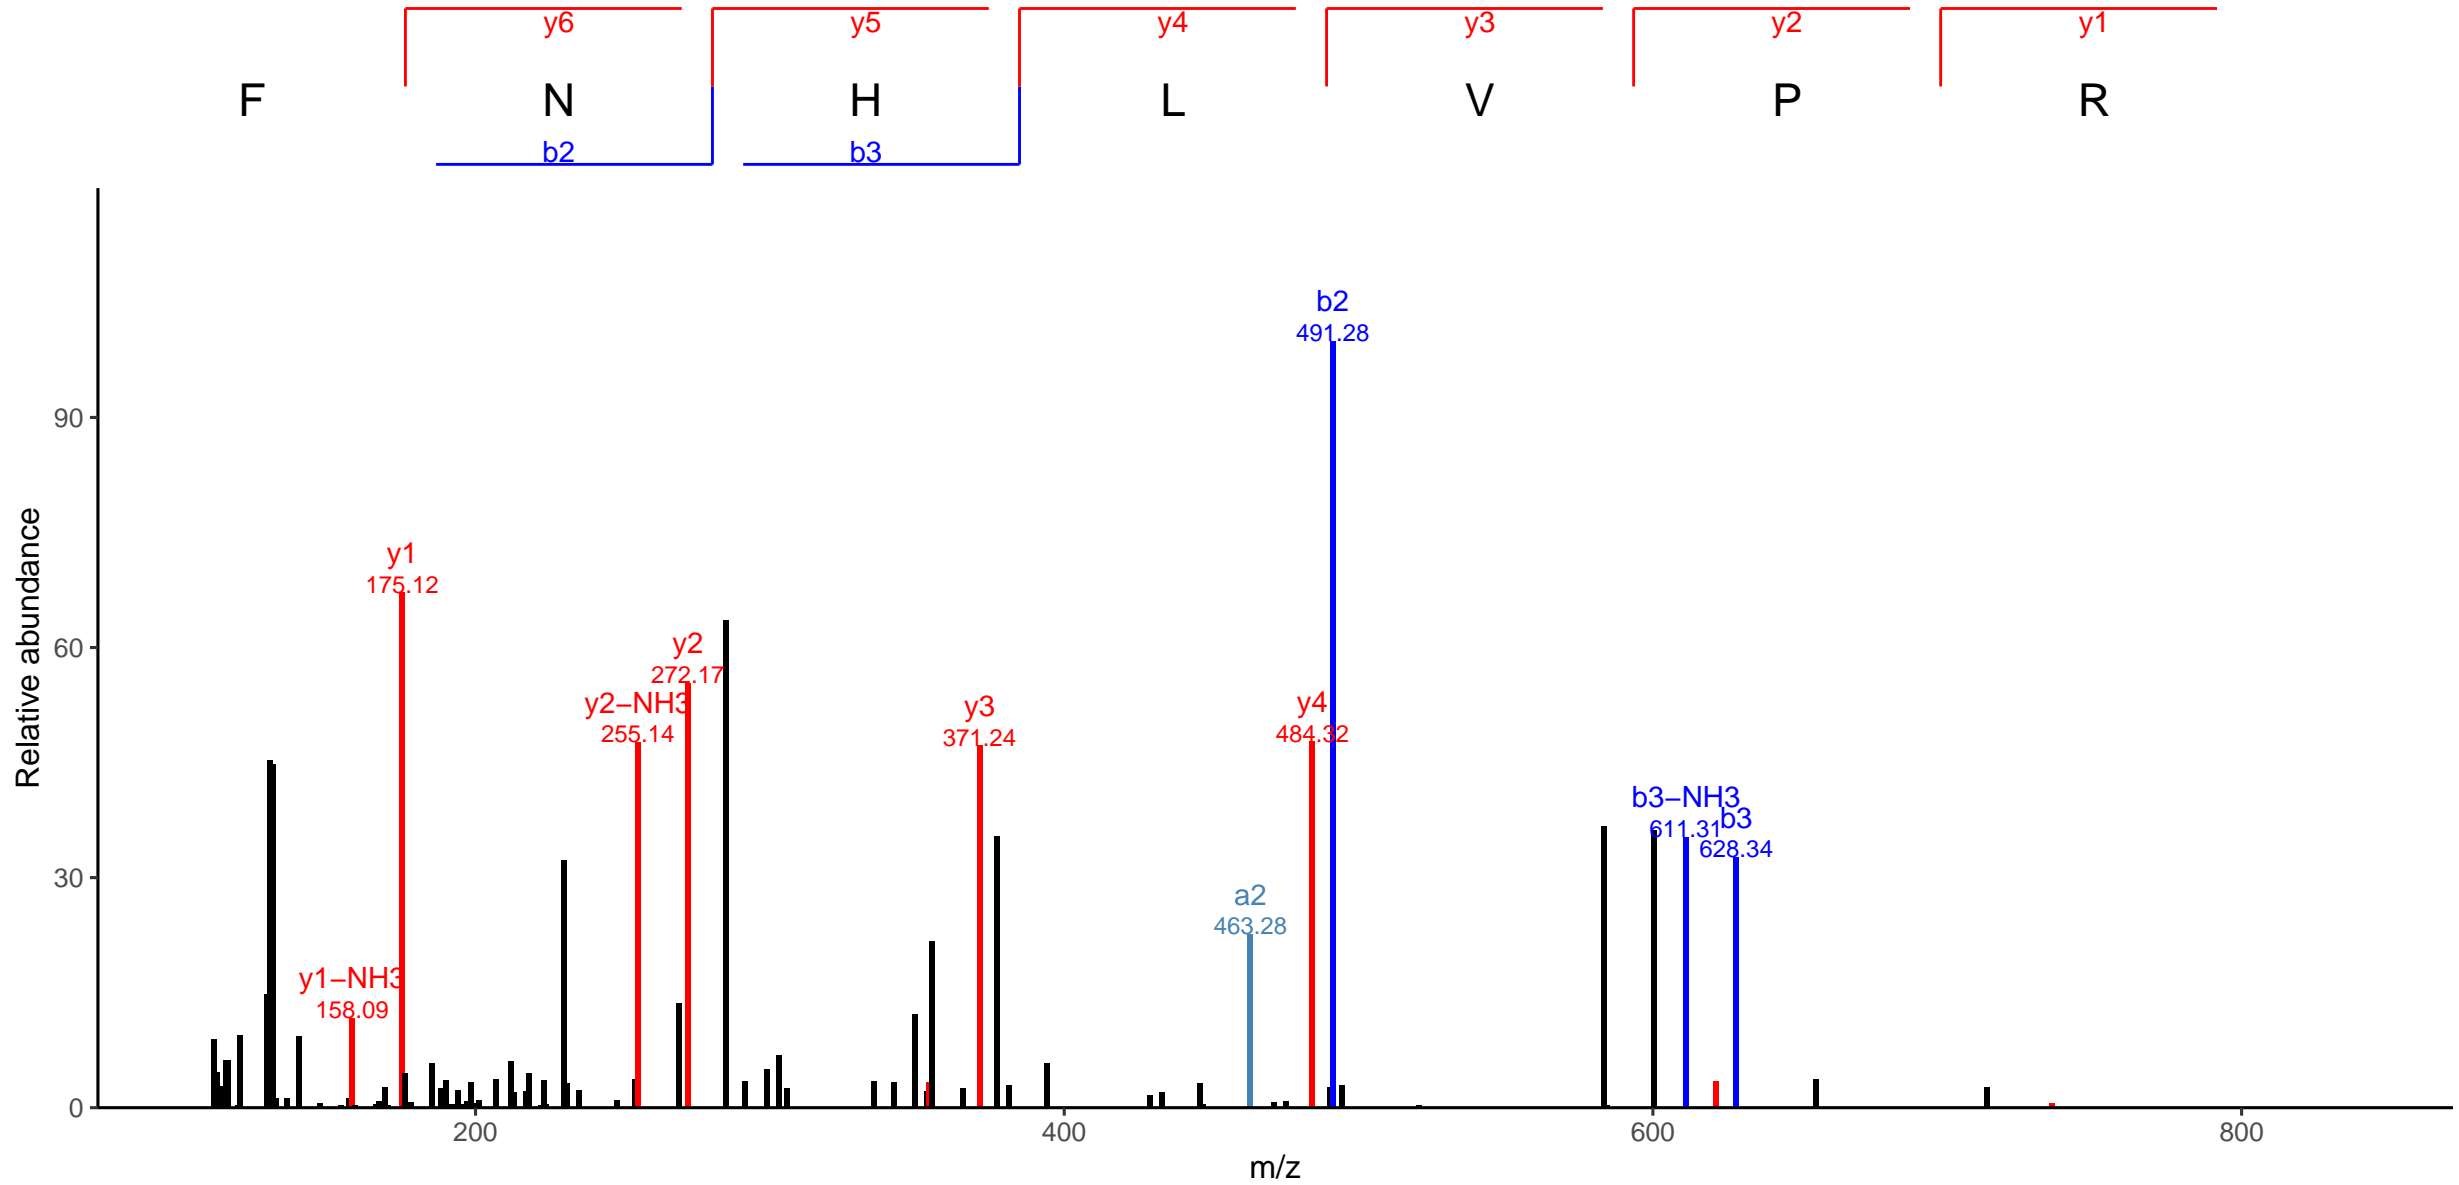

| Raw file | Scan number | Mass analyzer | Score  | m/z      | Proteins |
|----------|-------------|---------------|--------|----------|----------|
| 7610TQ_6 | 13884       | FTMS          | 155.09 | 729.3252 | P49903   |

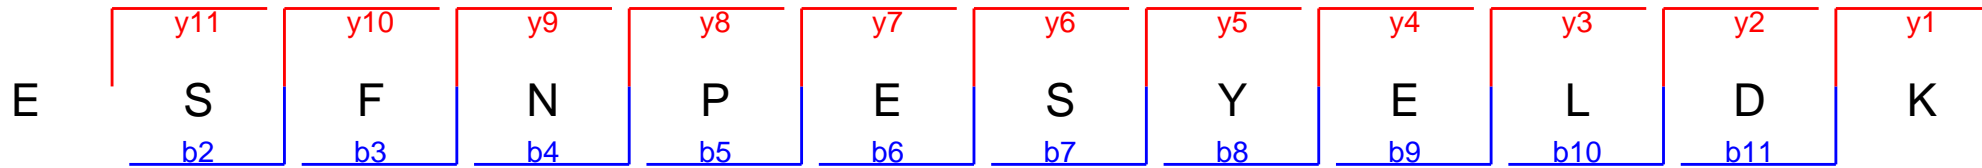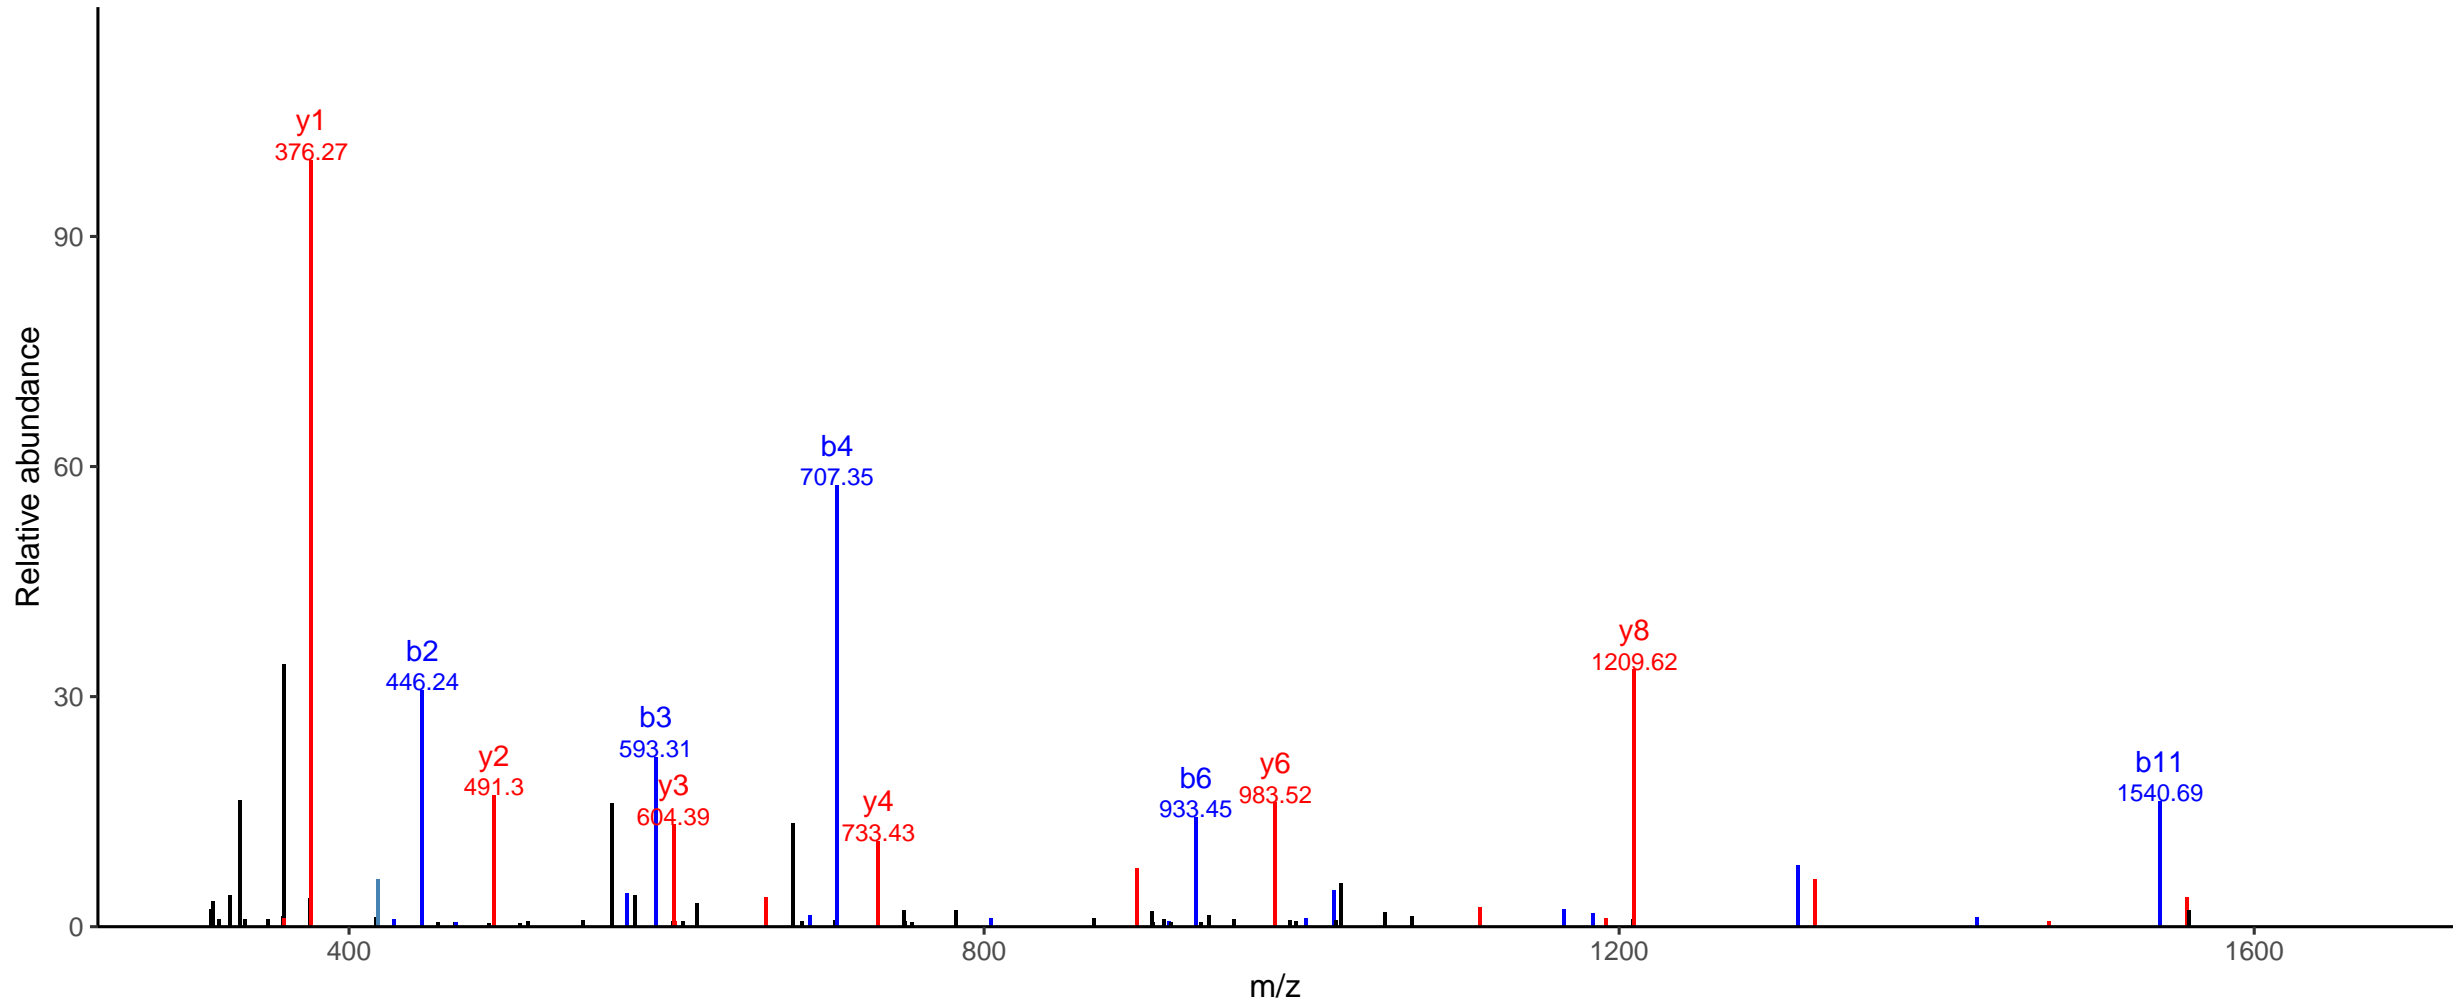



| Raw file | Scan number | Mass analyzer | Score  | m/z      | Proteins |
|----------|-------------|---------------|--------|----------|----------|
| 7610TQ_5 | 8578        | FTMS          | 117.86 | 447.2249 | P53985   |

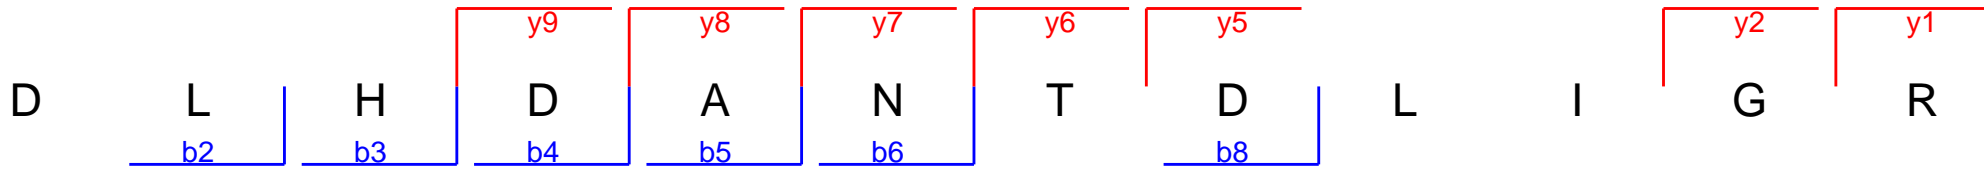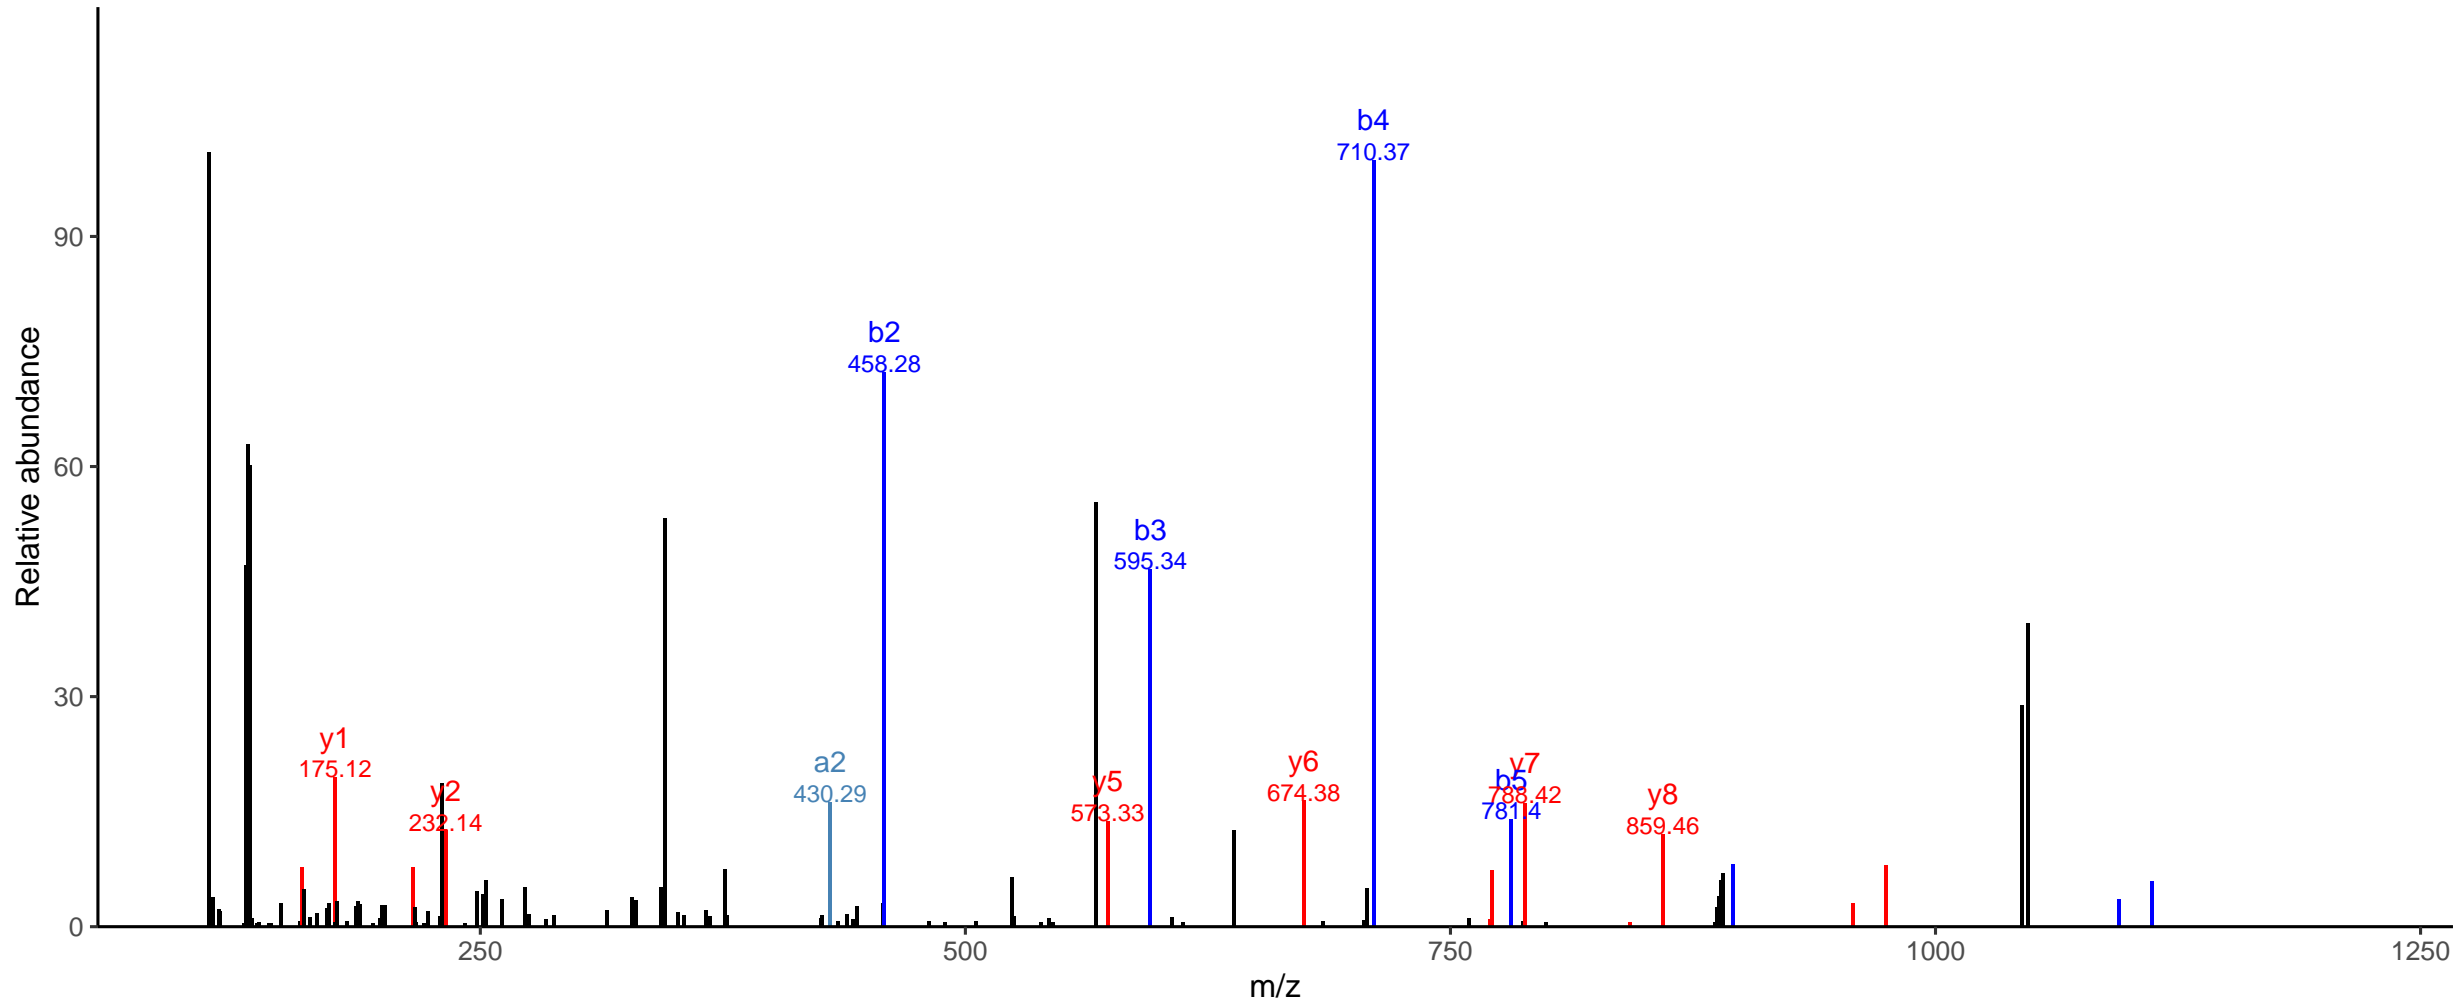

| Raw file  | Scan number | Mass analyzer | Score  | m/z      | Proteins |
|-----------|-------------|---------------|--------|----------|----------|
| 7610TQ_11 | 15614       | FTMS          | 143.93 | 845.8907 | P62714   |

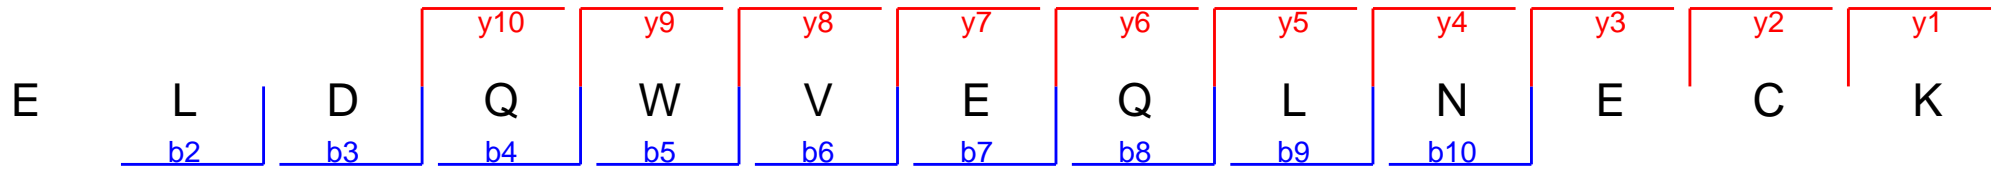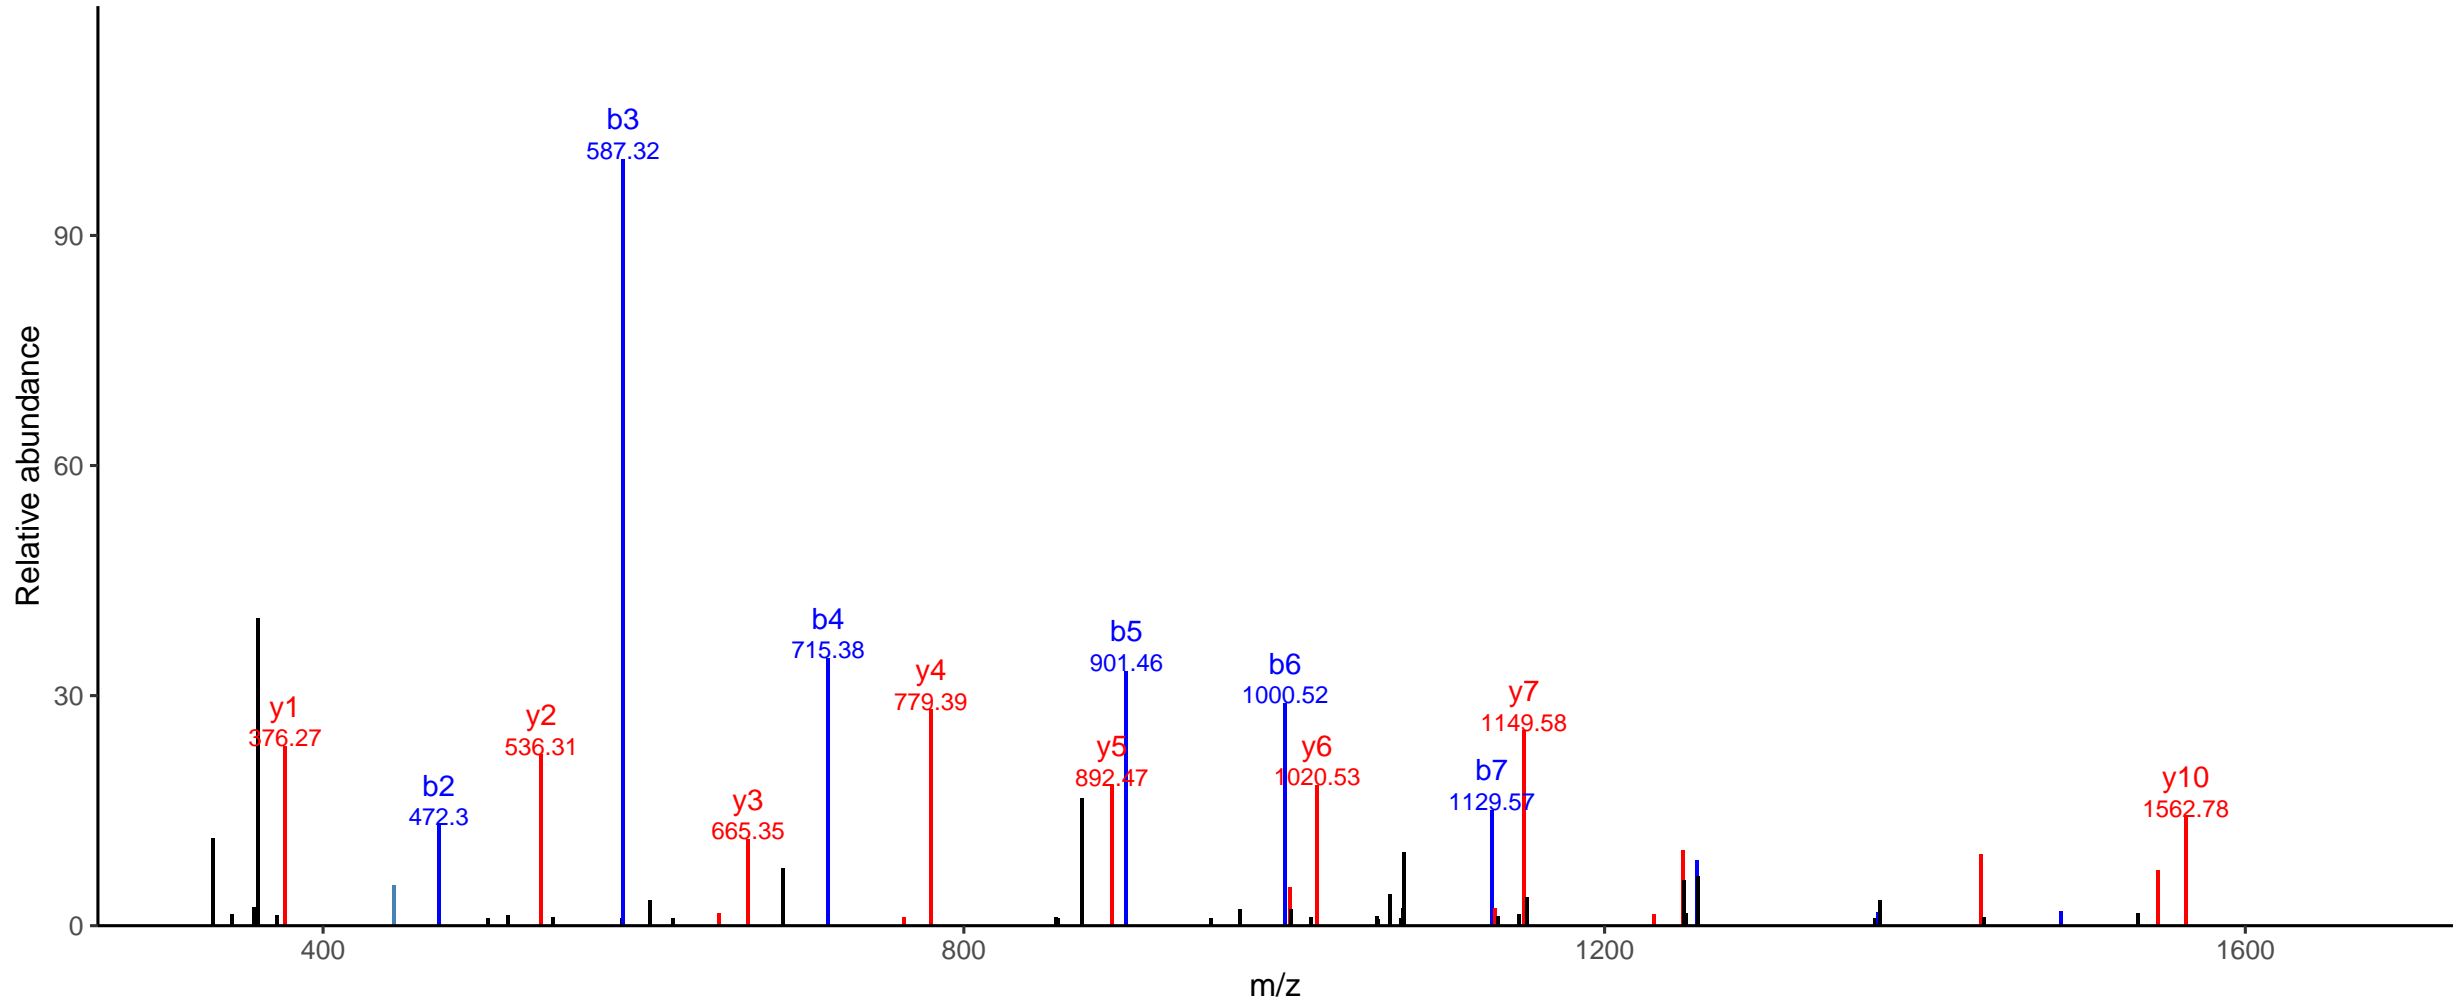

| Raw file  | Scan number | Mass analyzer | Score  | m/z      | Proteins |
|-----------|-------------|---------------|--------|----------|----------|
| 7610TQ_17 | 9705        | FTMS          | 83.204 | 677.3578 | P62841   |

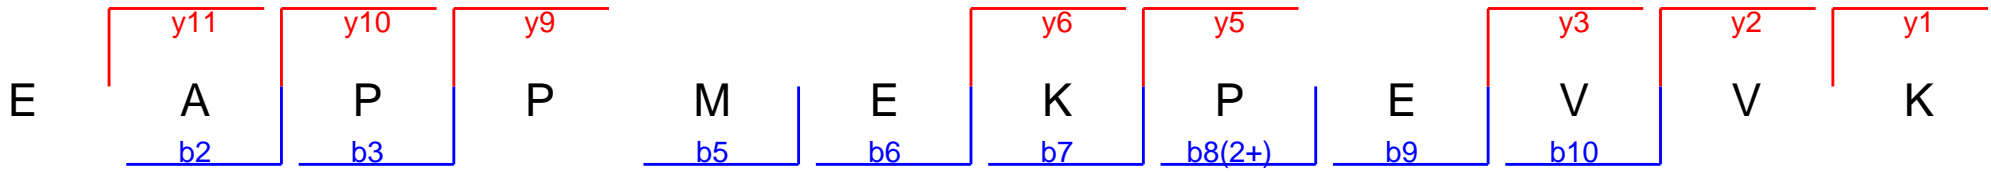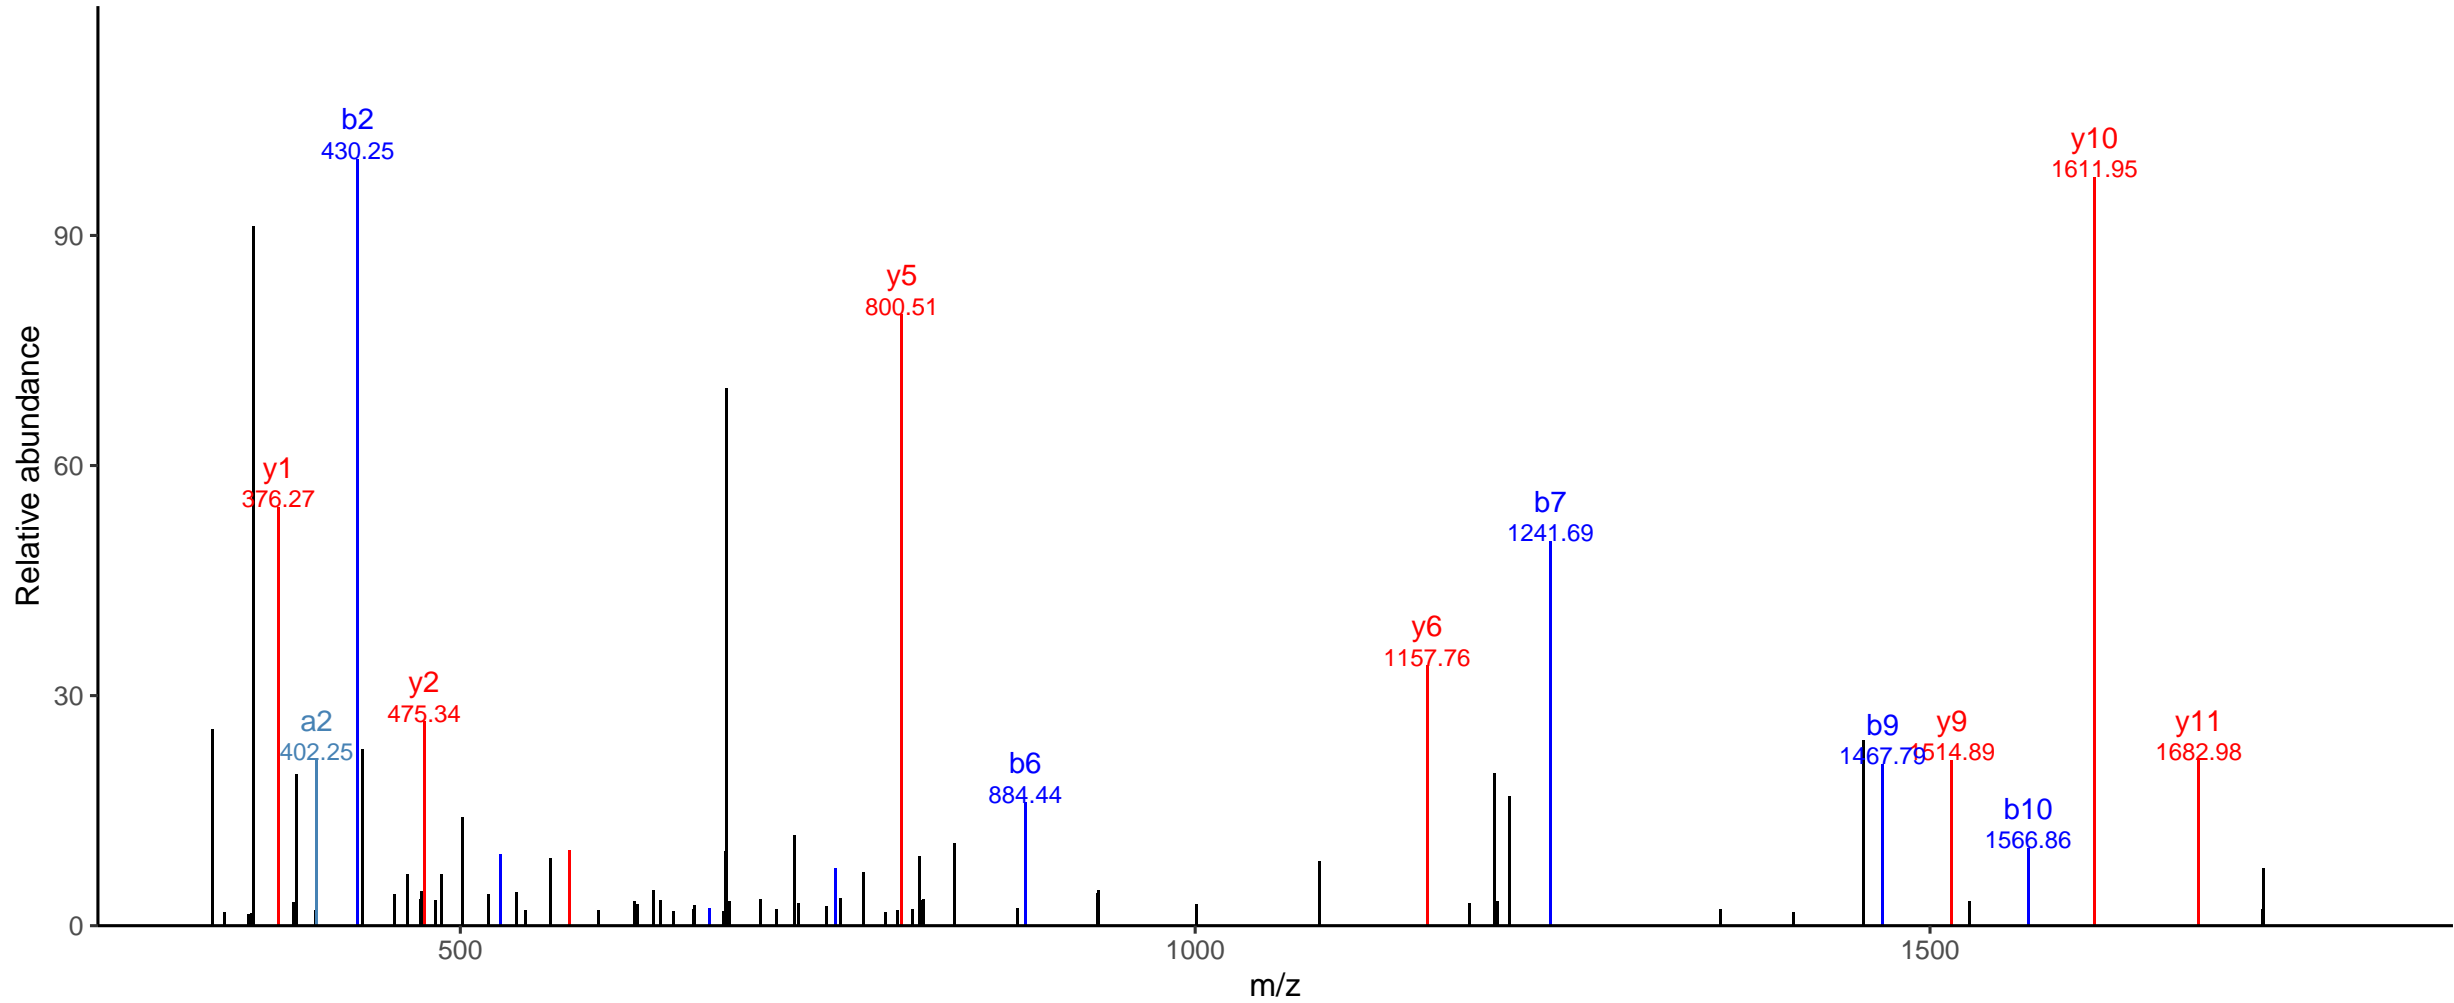

| Raw file | Scan number | Mass analyzer | Score  | m/z      | Proteins |
|----------|-------------|---------------|--------|----------|----------|
| 7610TQ_3 | 9362        | FTMS          | 126.19 | 902.4942 | P63218   |

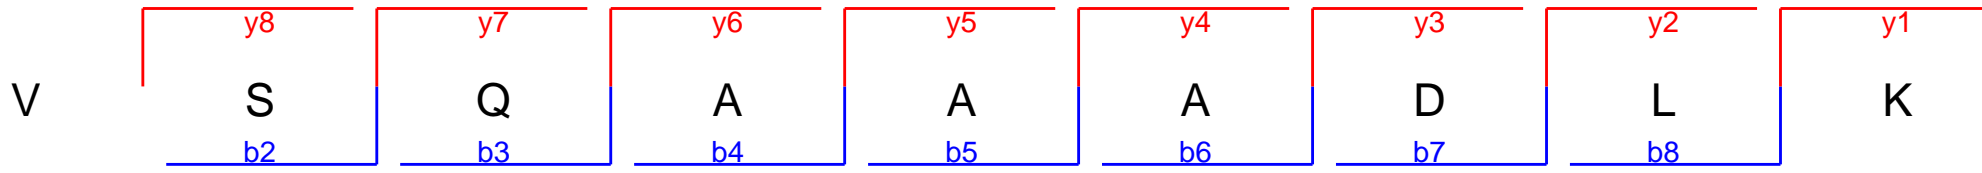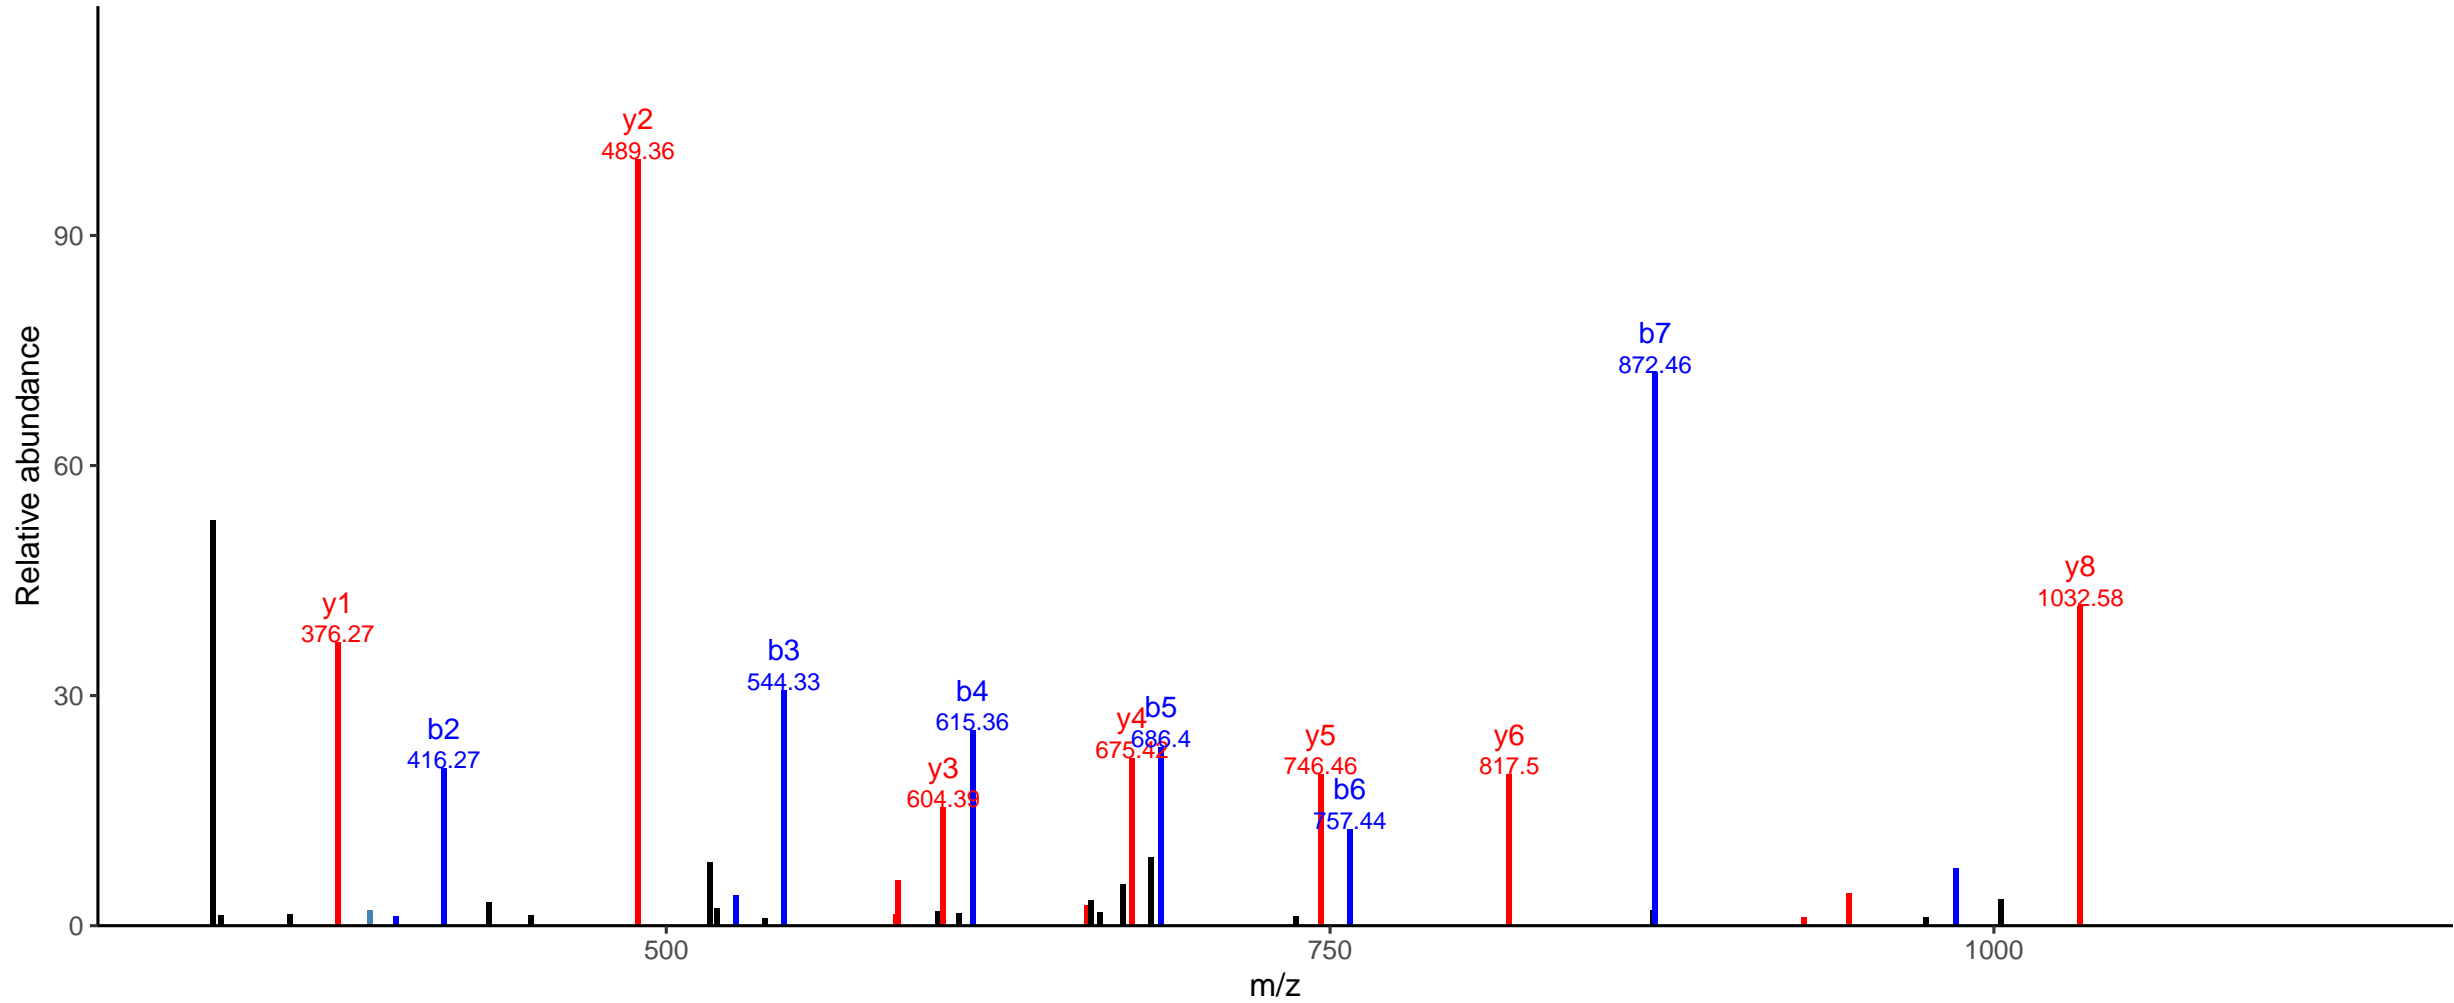

| Raw file  | Scan number | Mass analyzer | Score  | m/z      | Proteins |
|-----------|-------------|---------------|--------|----------|----------|
| 7610TQ_16 | 12761       | FTMS          | 69.721 | 1135.566 | Q5M9N0   |

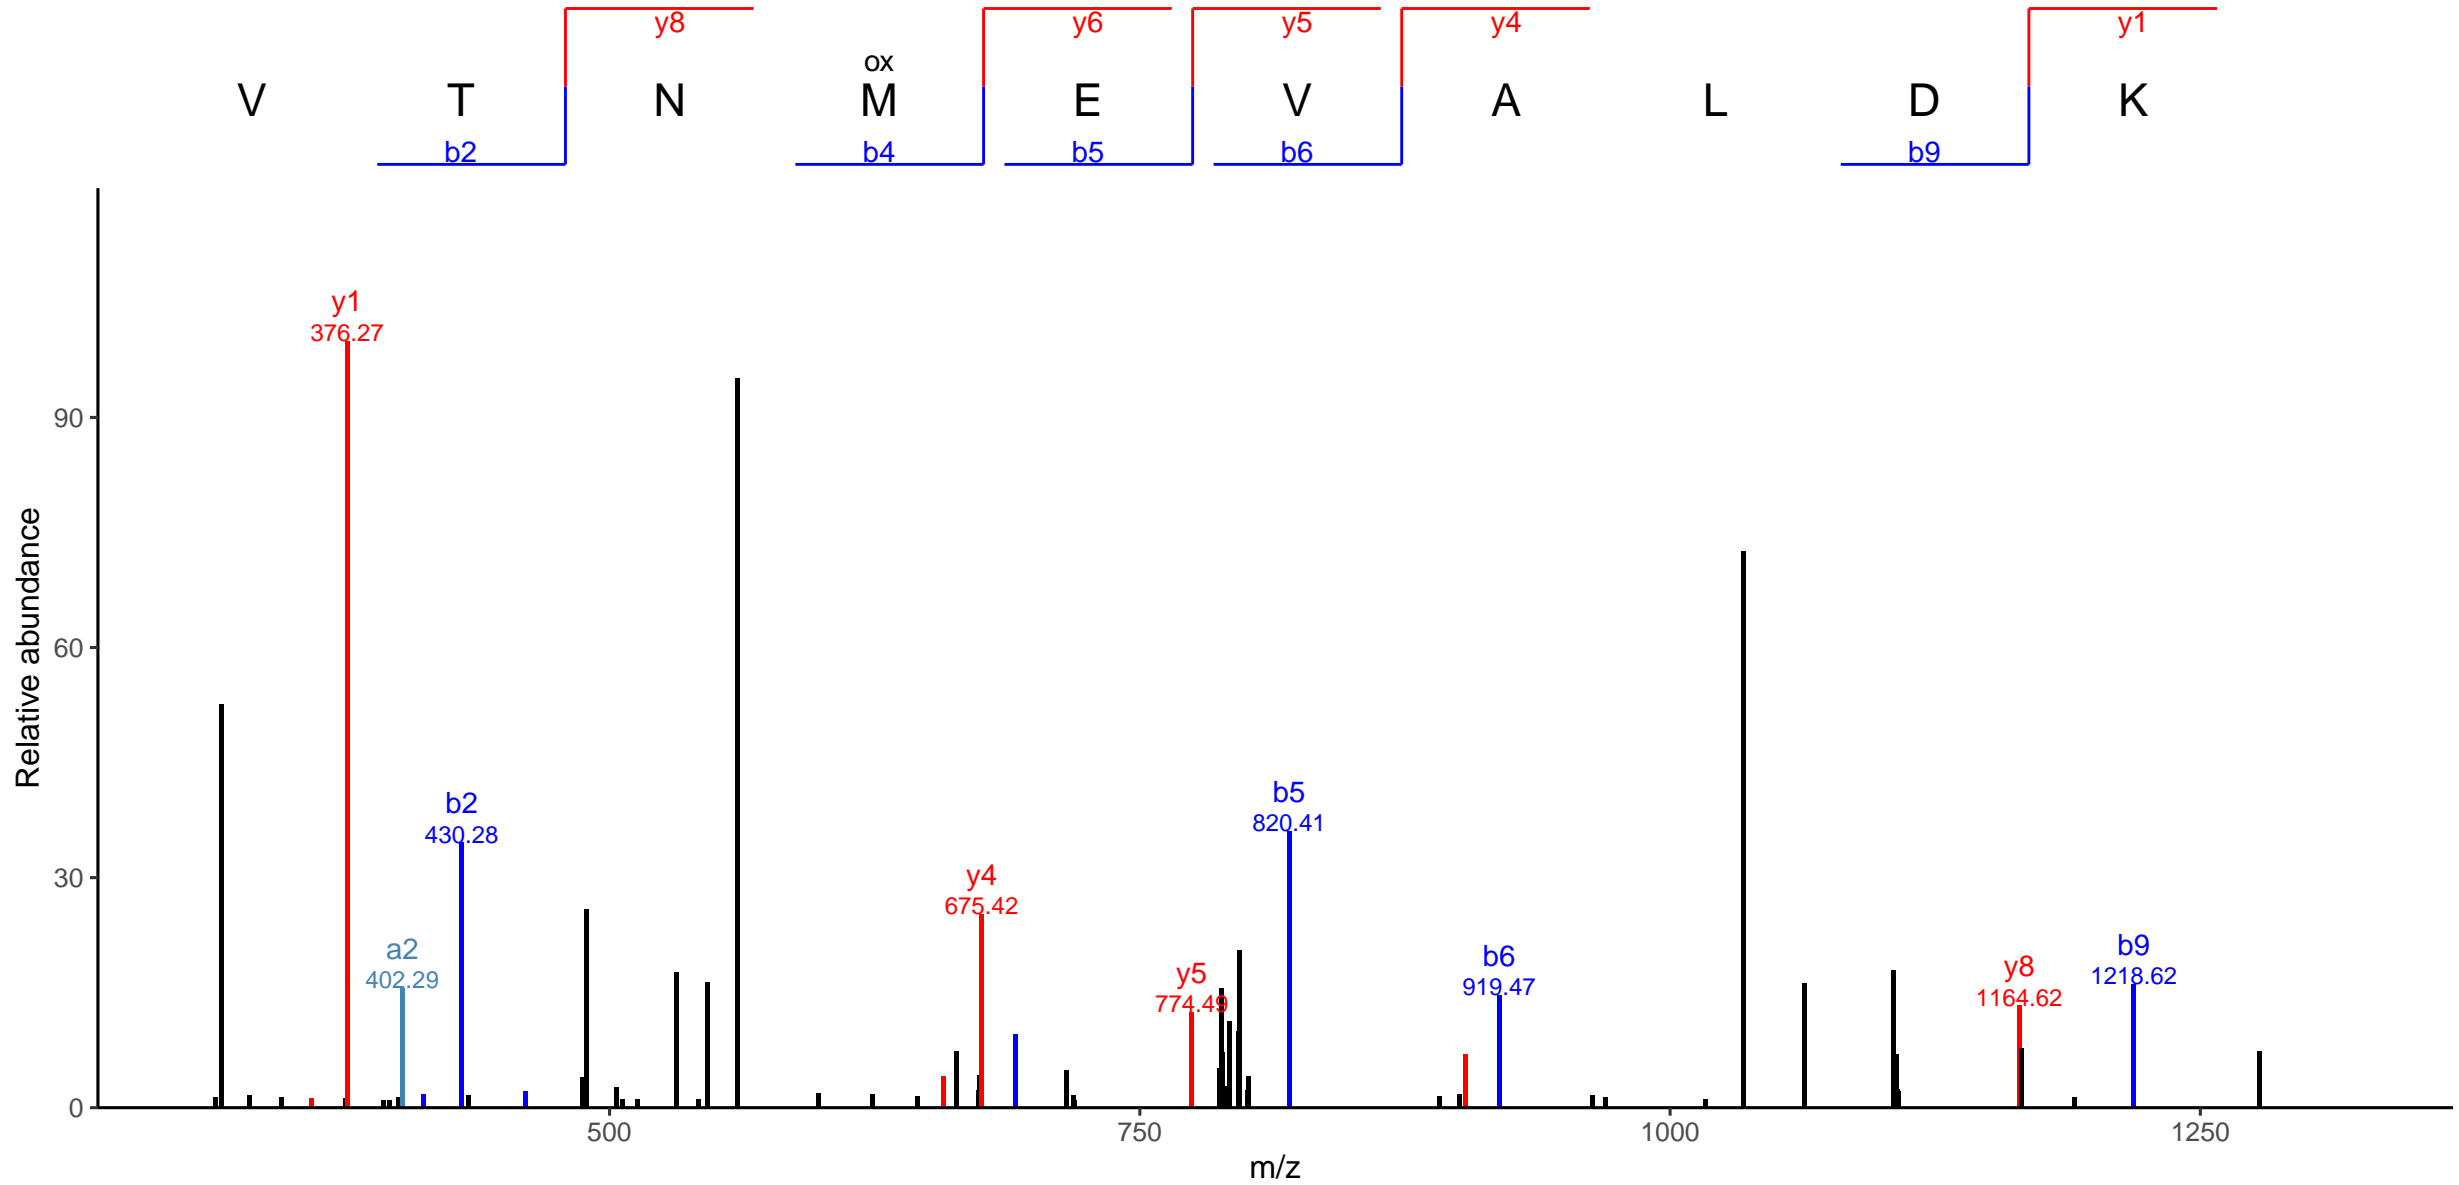

| Raw file  | Scan number | Mass analyzer | Score  | m/z      | Proteins |
|-----------|-------------|---------------|--------|----------|----------|
| 7610TQ_14 | 12607       | FTMS          | 91.853 | 944.5411 | Q5T5A4   |

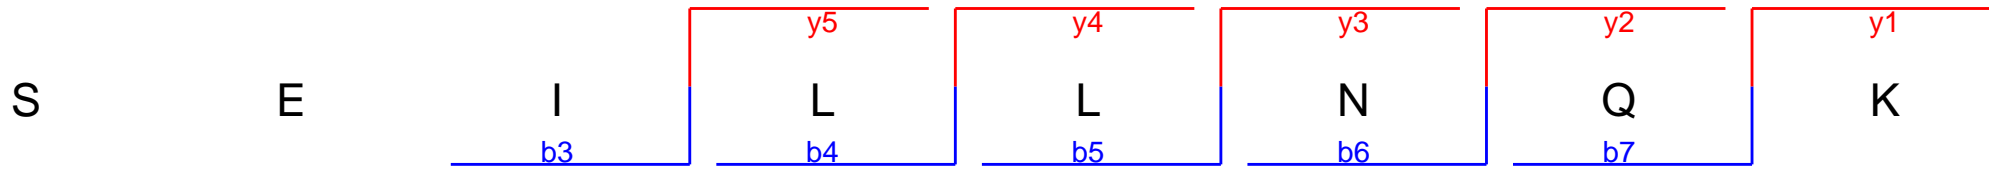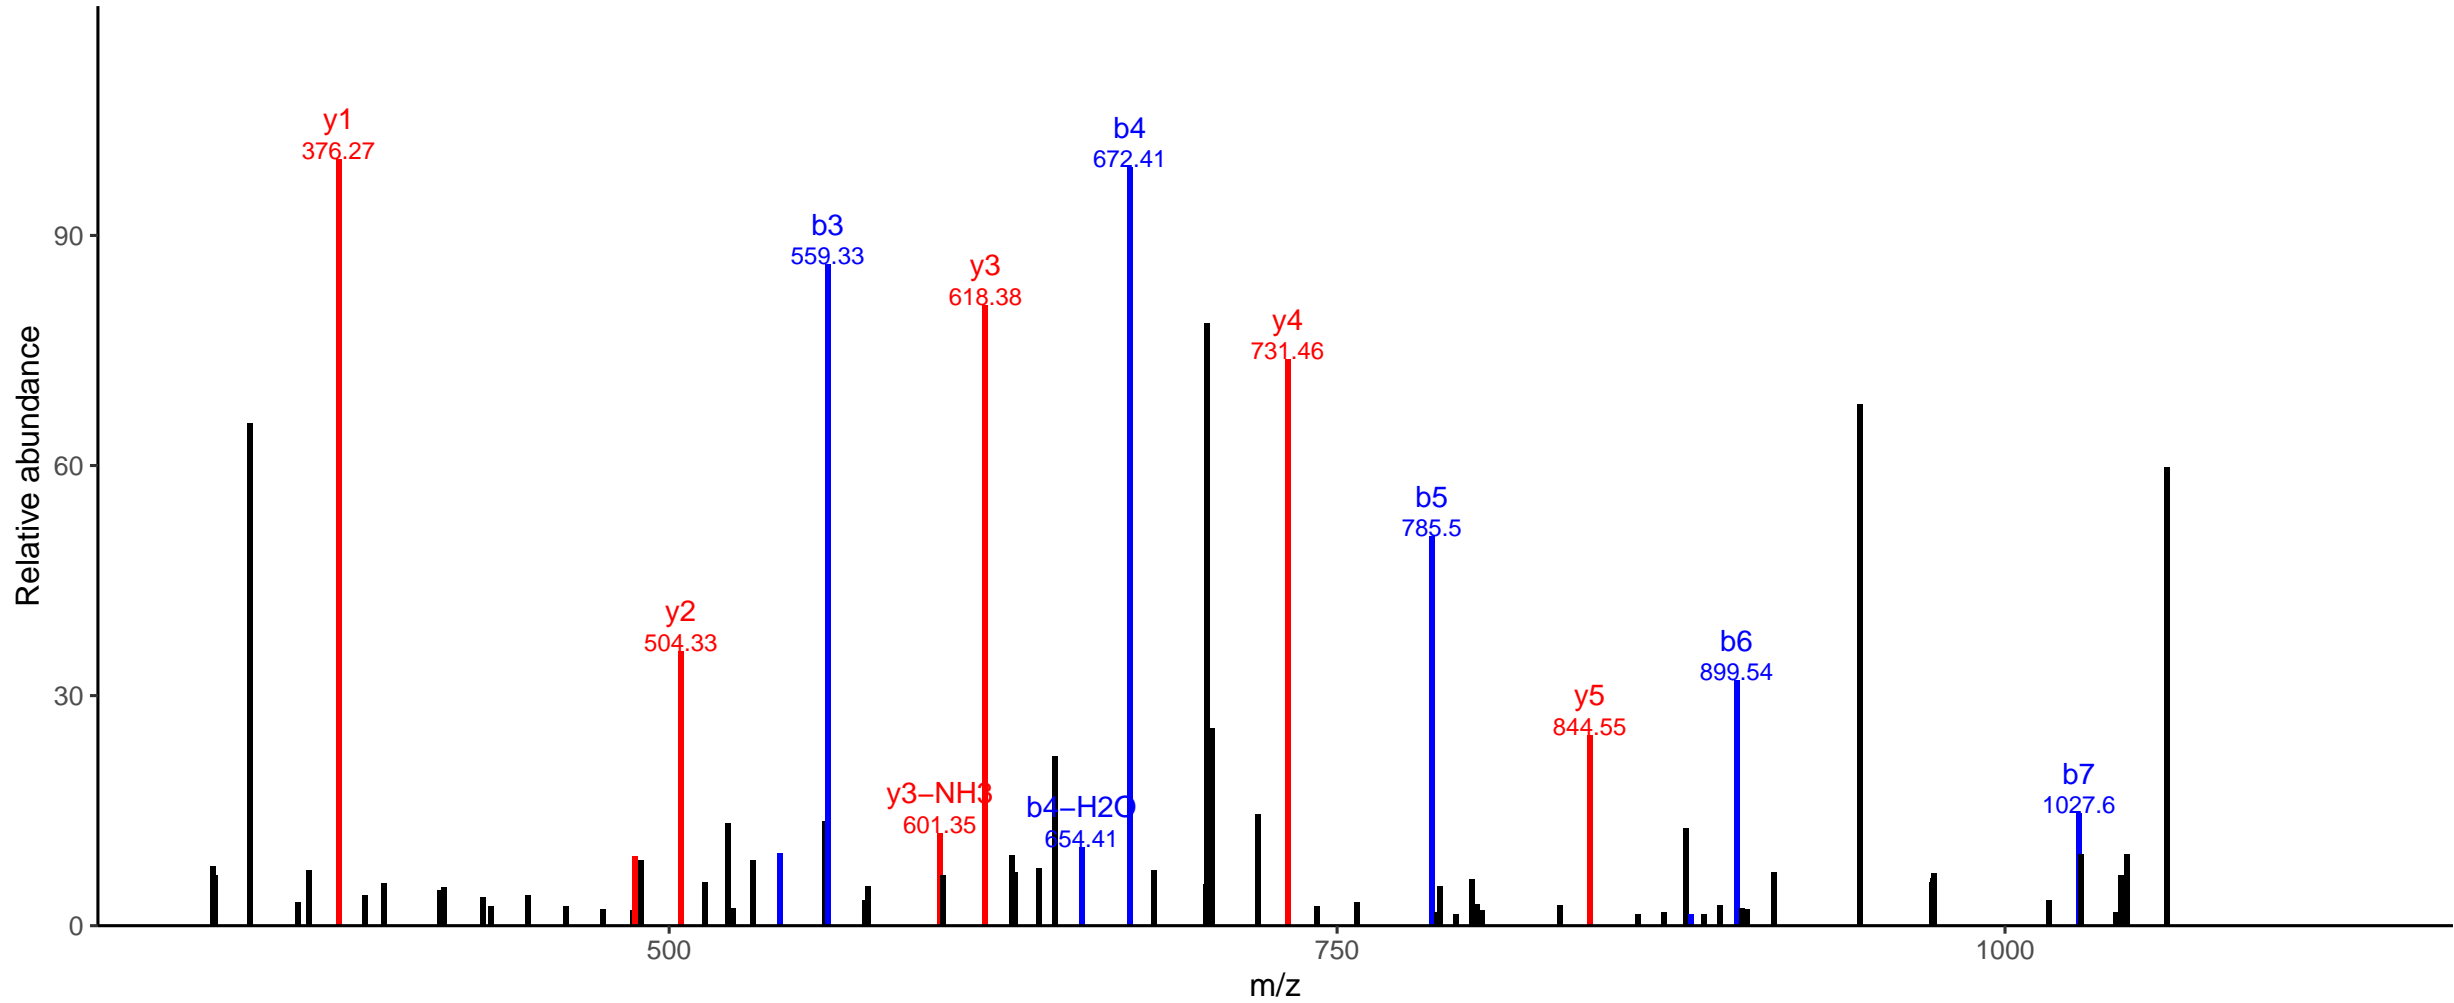

| Raw file  | Scan number | Mass analyzer | Score  | m/z      | Proteins |
|-----------|-------------|---------------|--------|----------|----------|
| 7610TQ_14 | 13888       | FTMS          | 83.377 | 399.7578 | Q6ZVF9   |

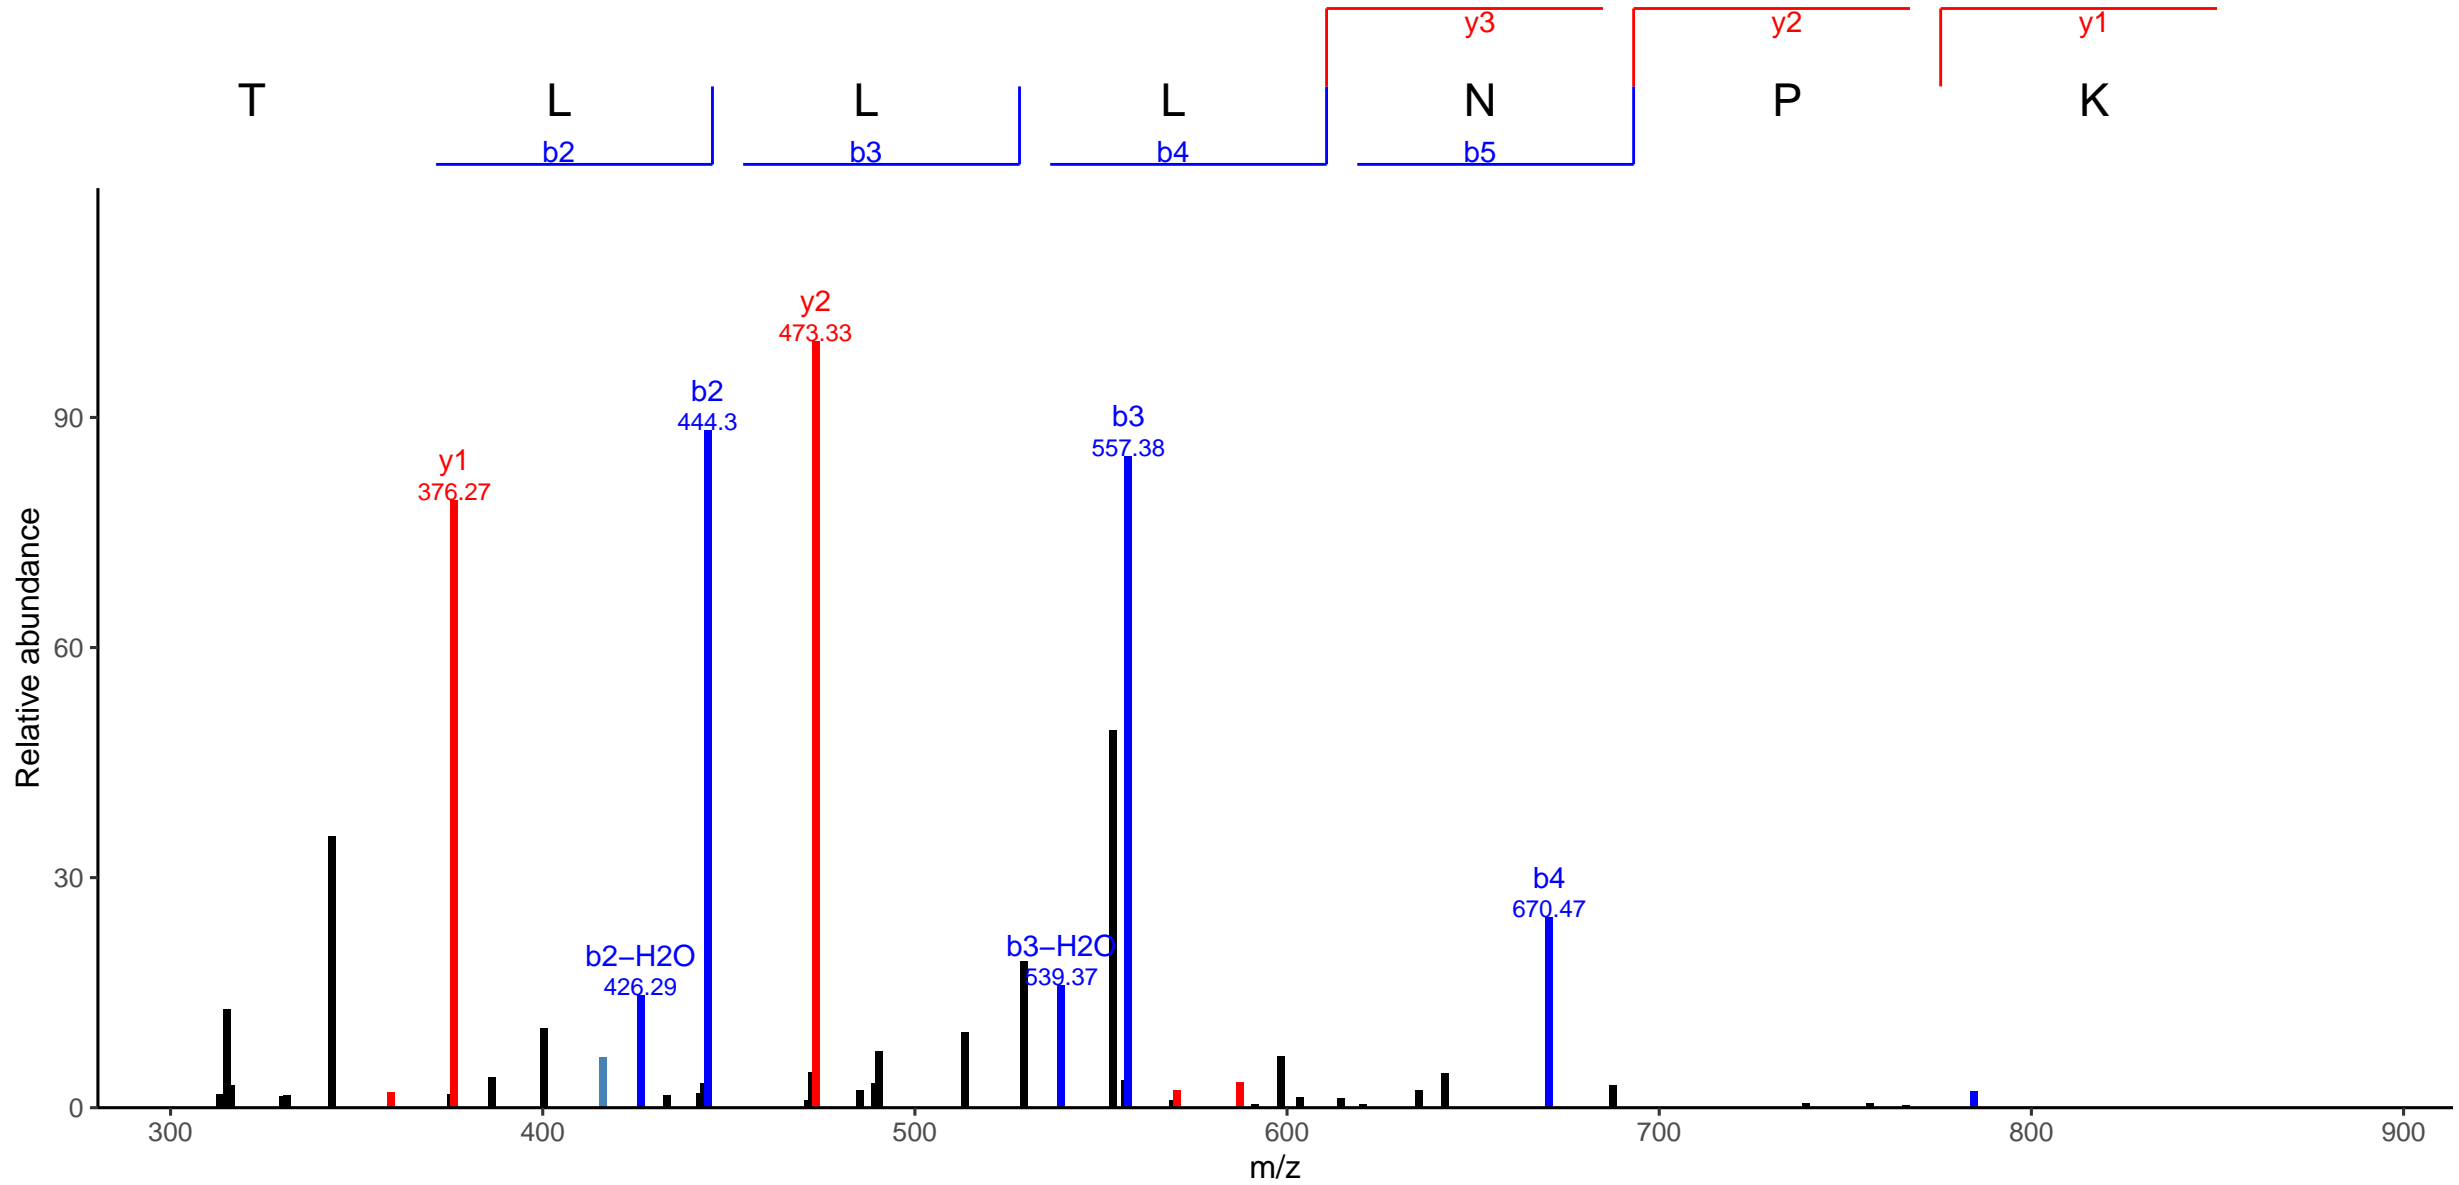

| Raw file  | Scan number | Mass analyzer | Score  | m/z      | Proteins |
|-----------|-------------|---------------|--------|----------|----------|
| 7610TQ_15 | 14592       | FTMS          | 124.98 | 957.4499 | Q8IW41   |

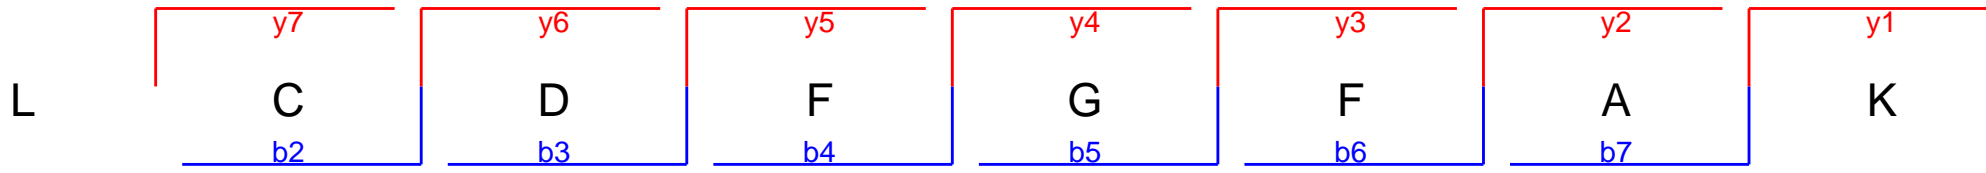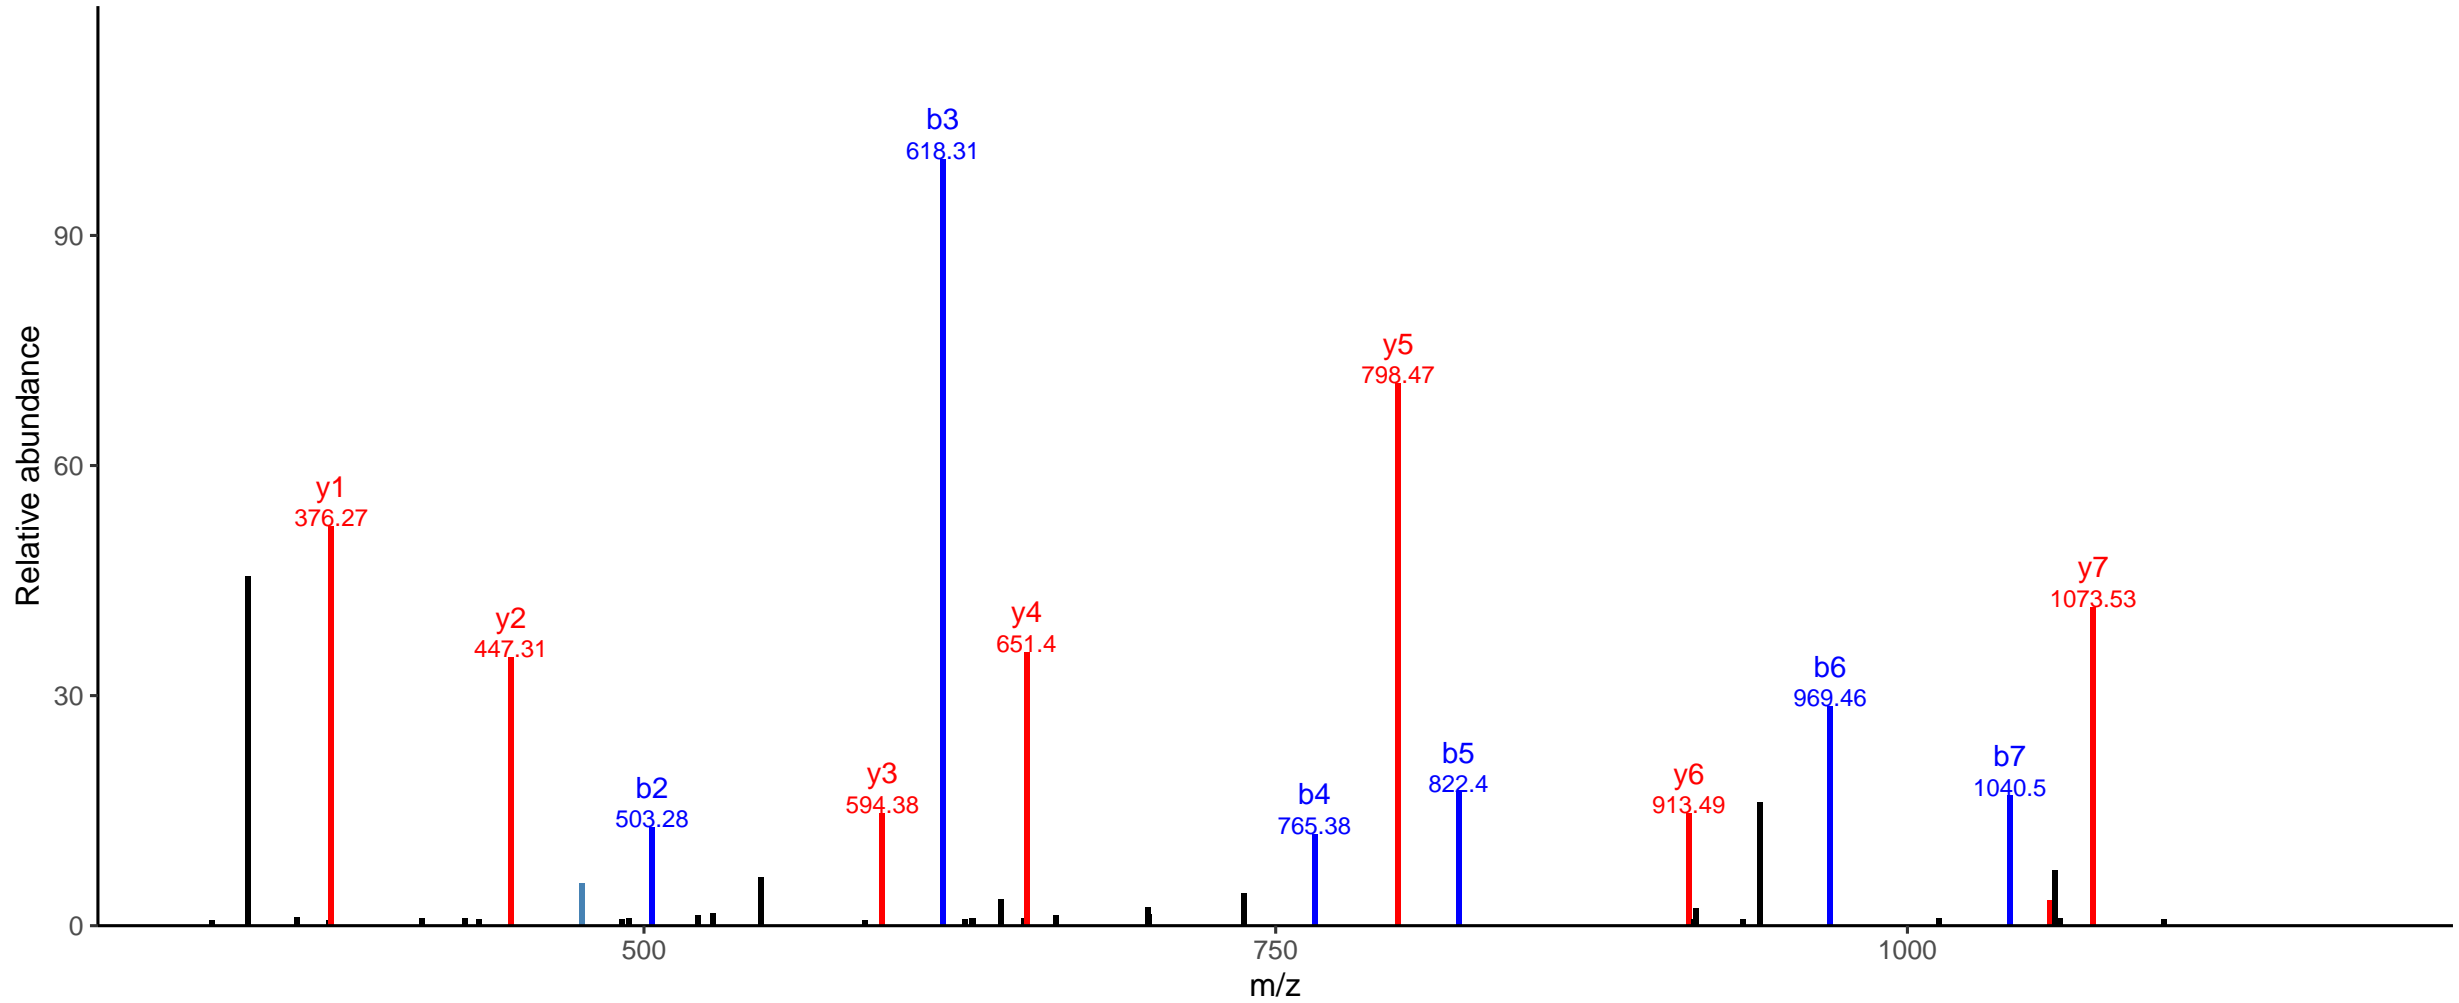



| Raw file | Scan number | Mass analyzer | Score  | m/z      | Proteins |
|----------|-------------|---------------|--------|----------|----------|
| 7610TQ_8 | 15827       | FTMS          | 73.885 | 614.8035 | Q8IWT0   |

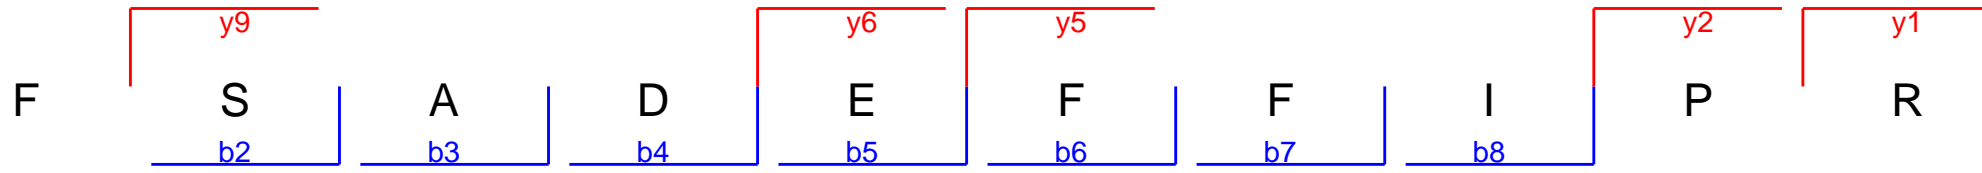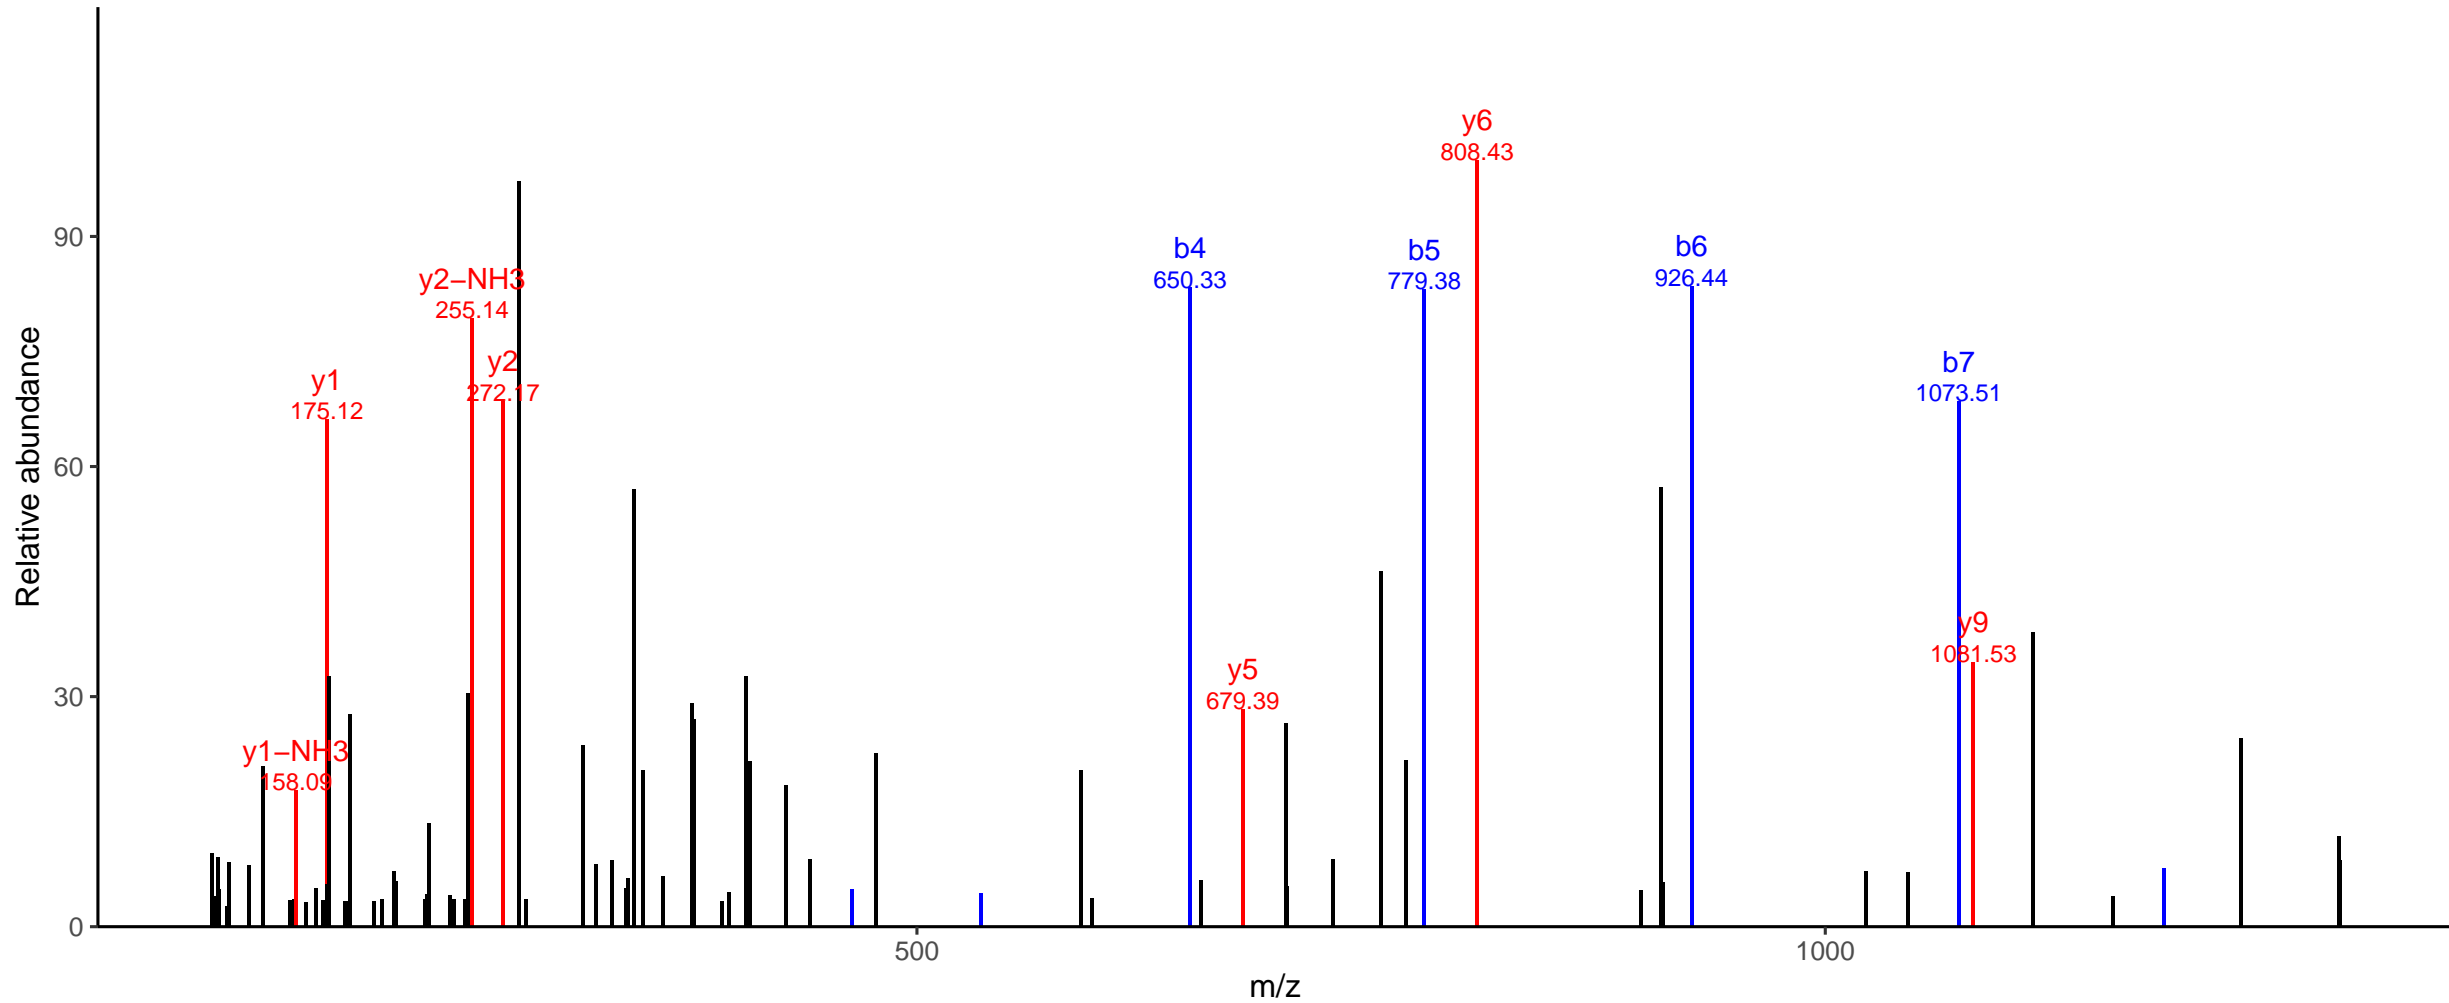

| Raw file | Scan number | Mass analyzer | Score | m/z     | Proteins |
|----------|-------------|---------------|-------|---------|----------|
| 7610TQ_3 | 13645       | FTMS          | 104.2 | 1043.61 | Q8IYE0   |

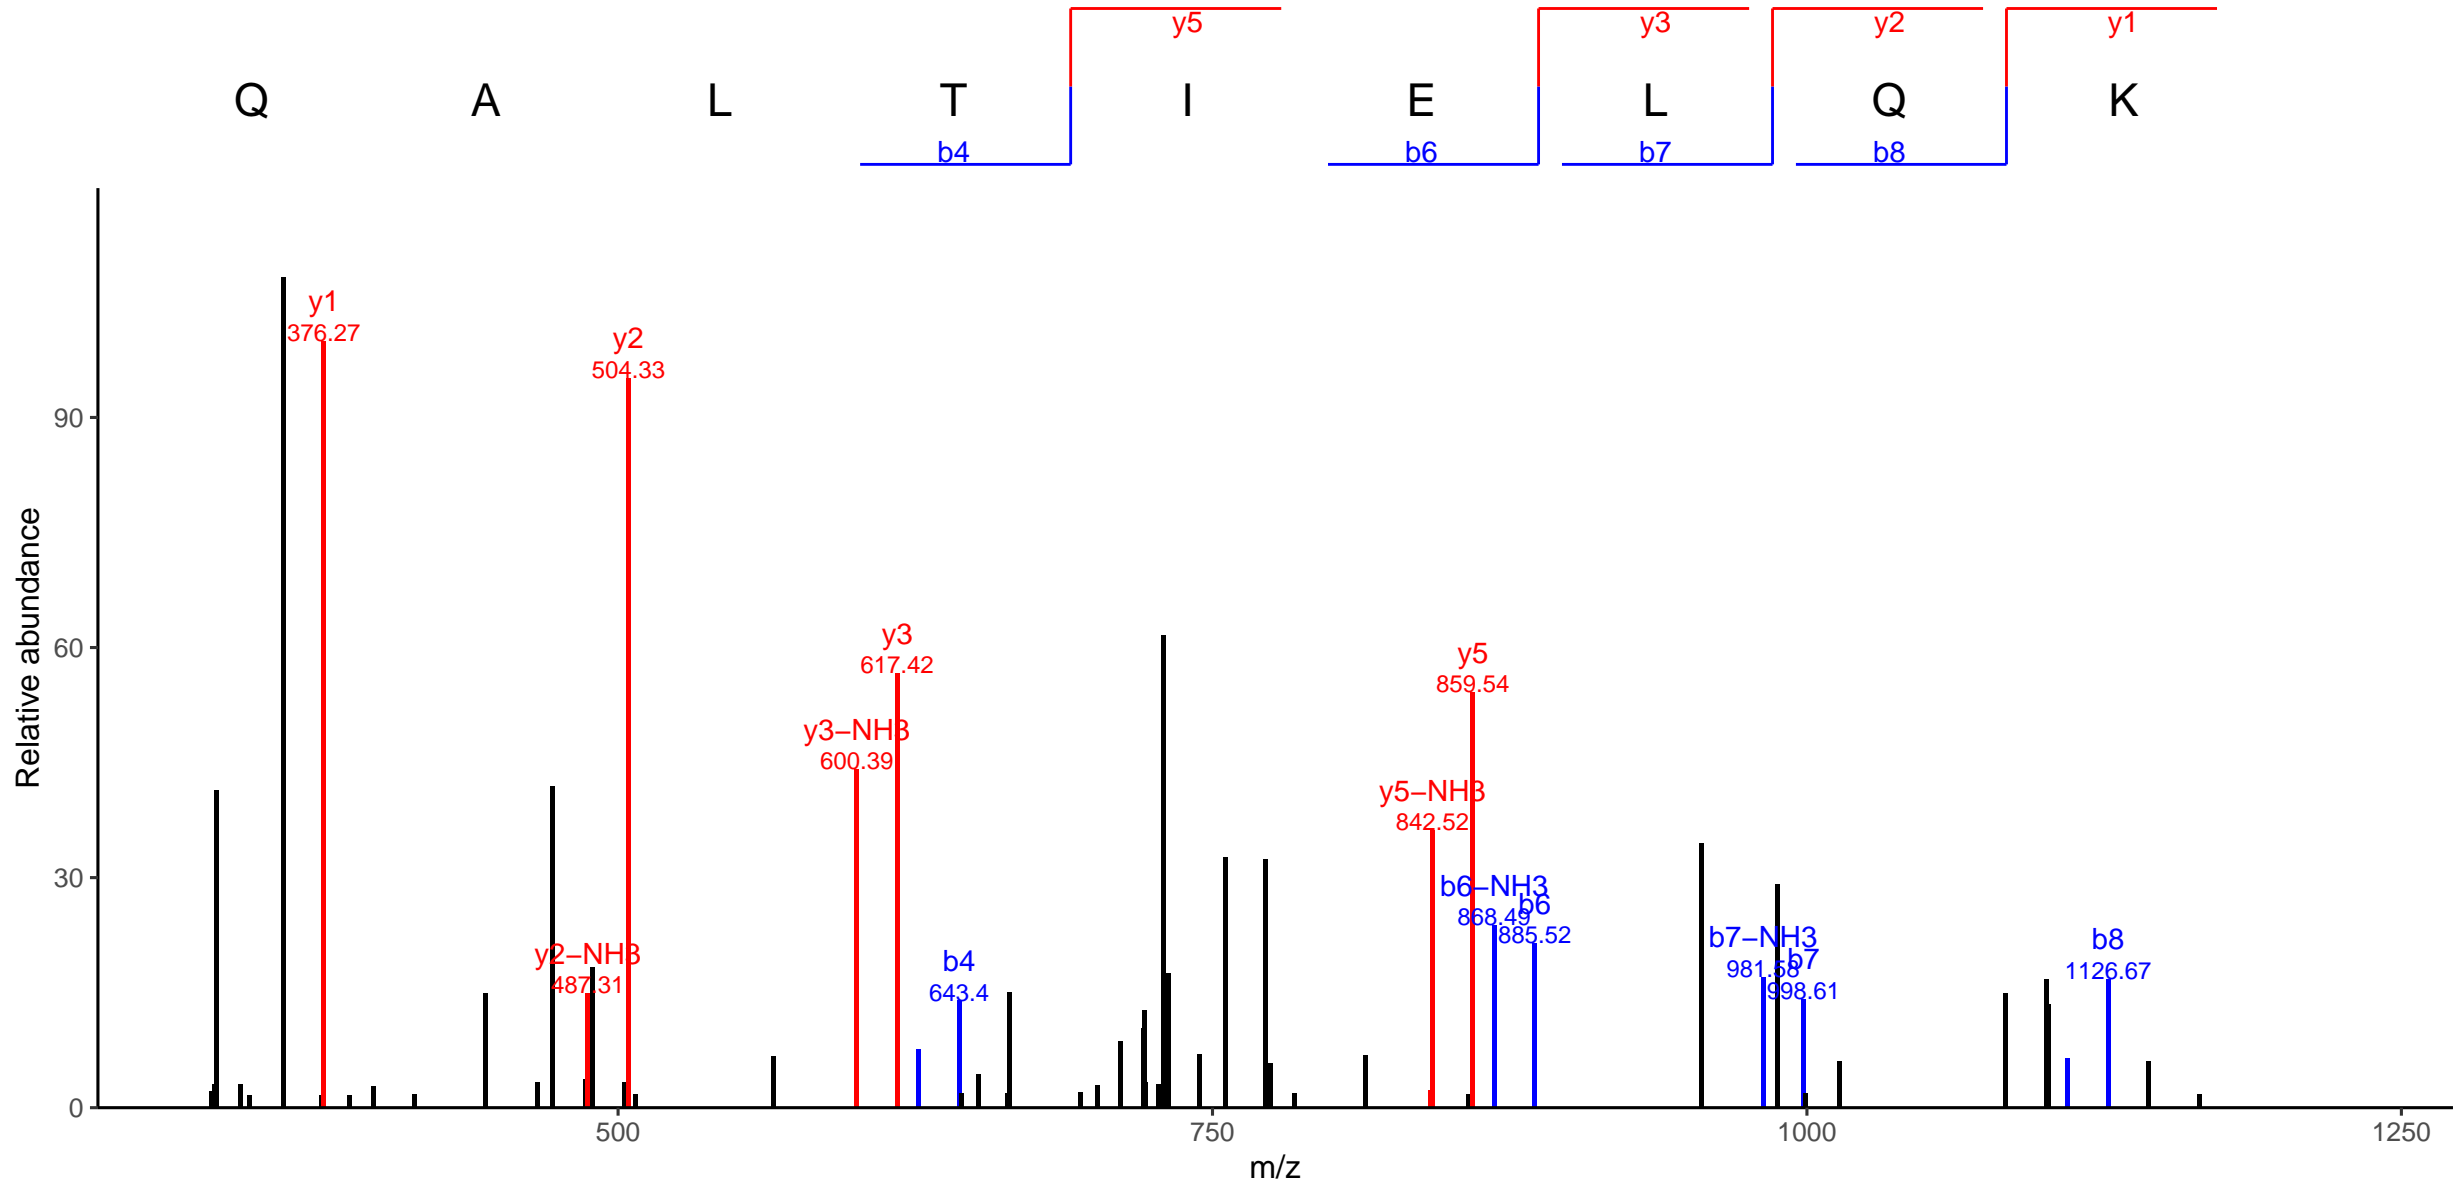

| Raw file  | Scan number | Mass analyzer | Score  | m/z      | Proteins |
|-----------|-------------|---------------|--------|----------|----------|
| 7610TQ_18 | 1619        | FTMS          | 85.937 | 468.9848 | Q8N726   |

R P G H D D G Q R P S G G A A A A P R

b4 b5 b6 b7 b8
y15 y14 y13
y10 y9 y8 y7
y5 y4 y3 y2 y1
b15(2+) b17 b18(2+)

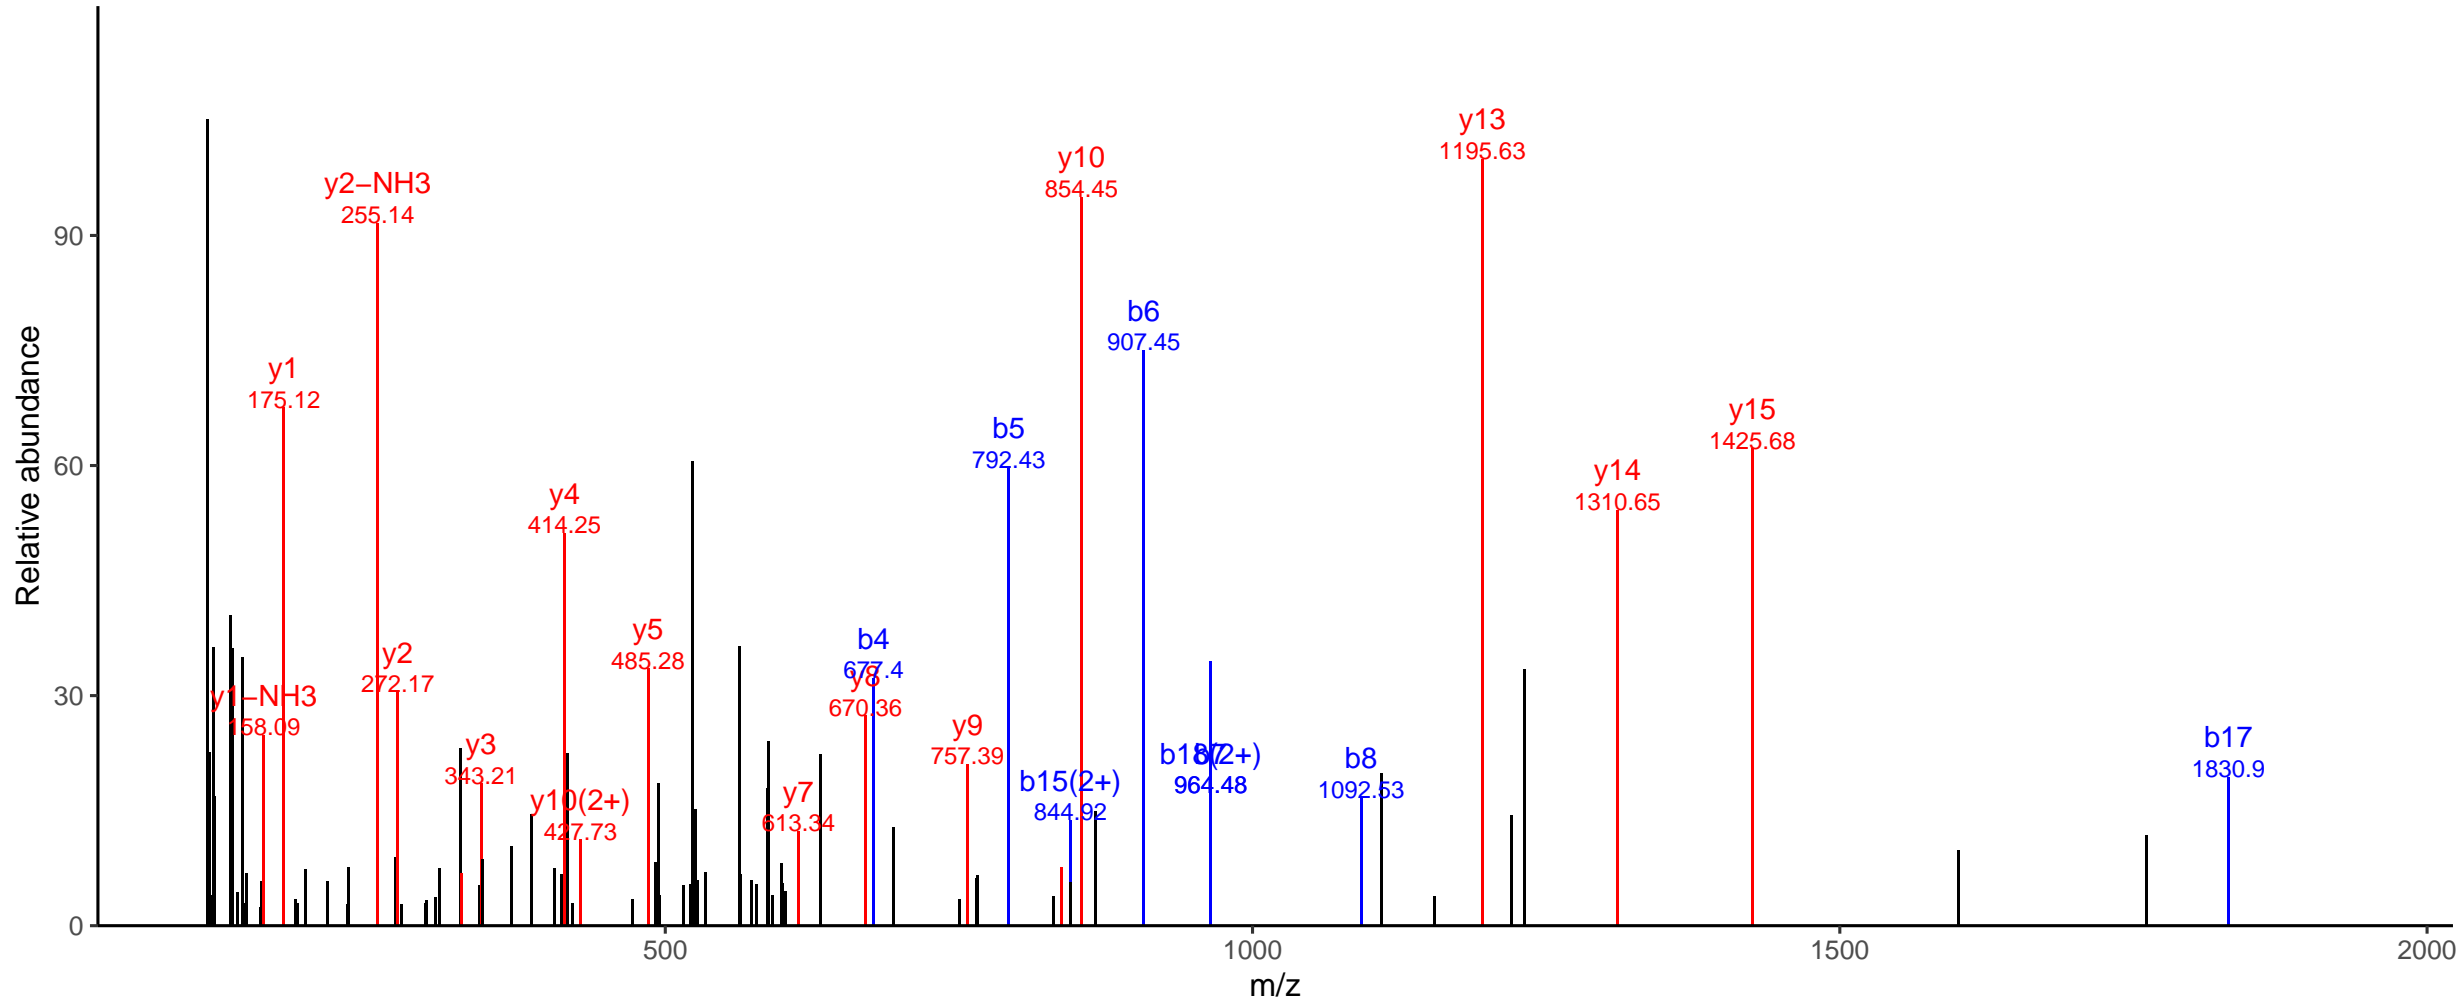

| Raw file  | Scan number | Mass analyzer | Score  | m/z      | Proteins                                         |
|-----------|-------------|---------------|--------|----------|--------------------------------------------------|
| 7610TQ_16 | 3725        | FTMS          | 150.27 | 512.2281 | P68363;P68366;Q71U36;Q13748;Q9BQE3;A6NHL2;Q9NY65 |

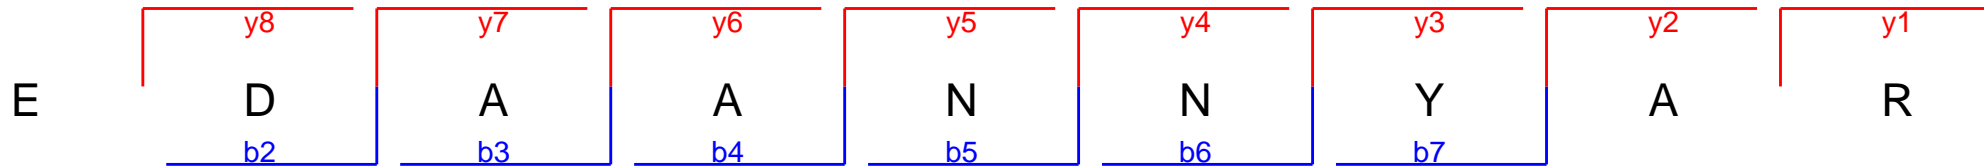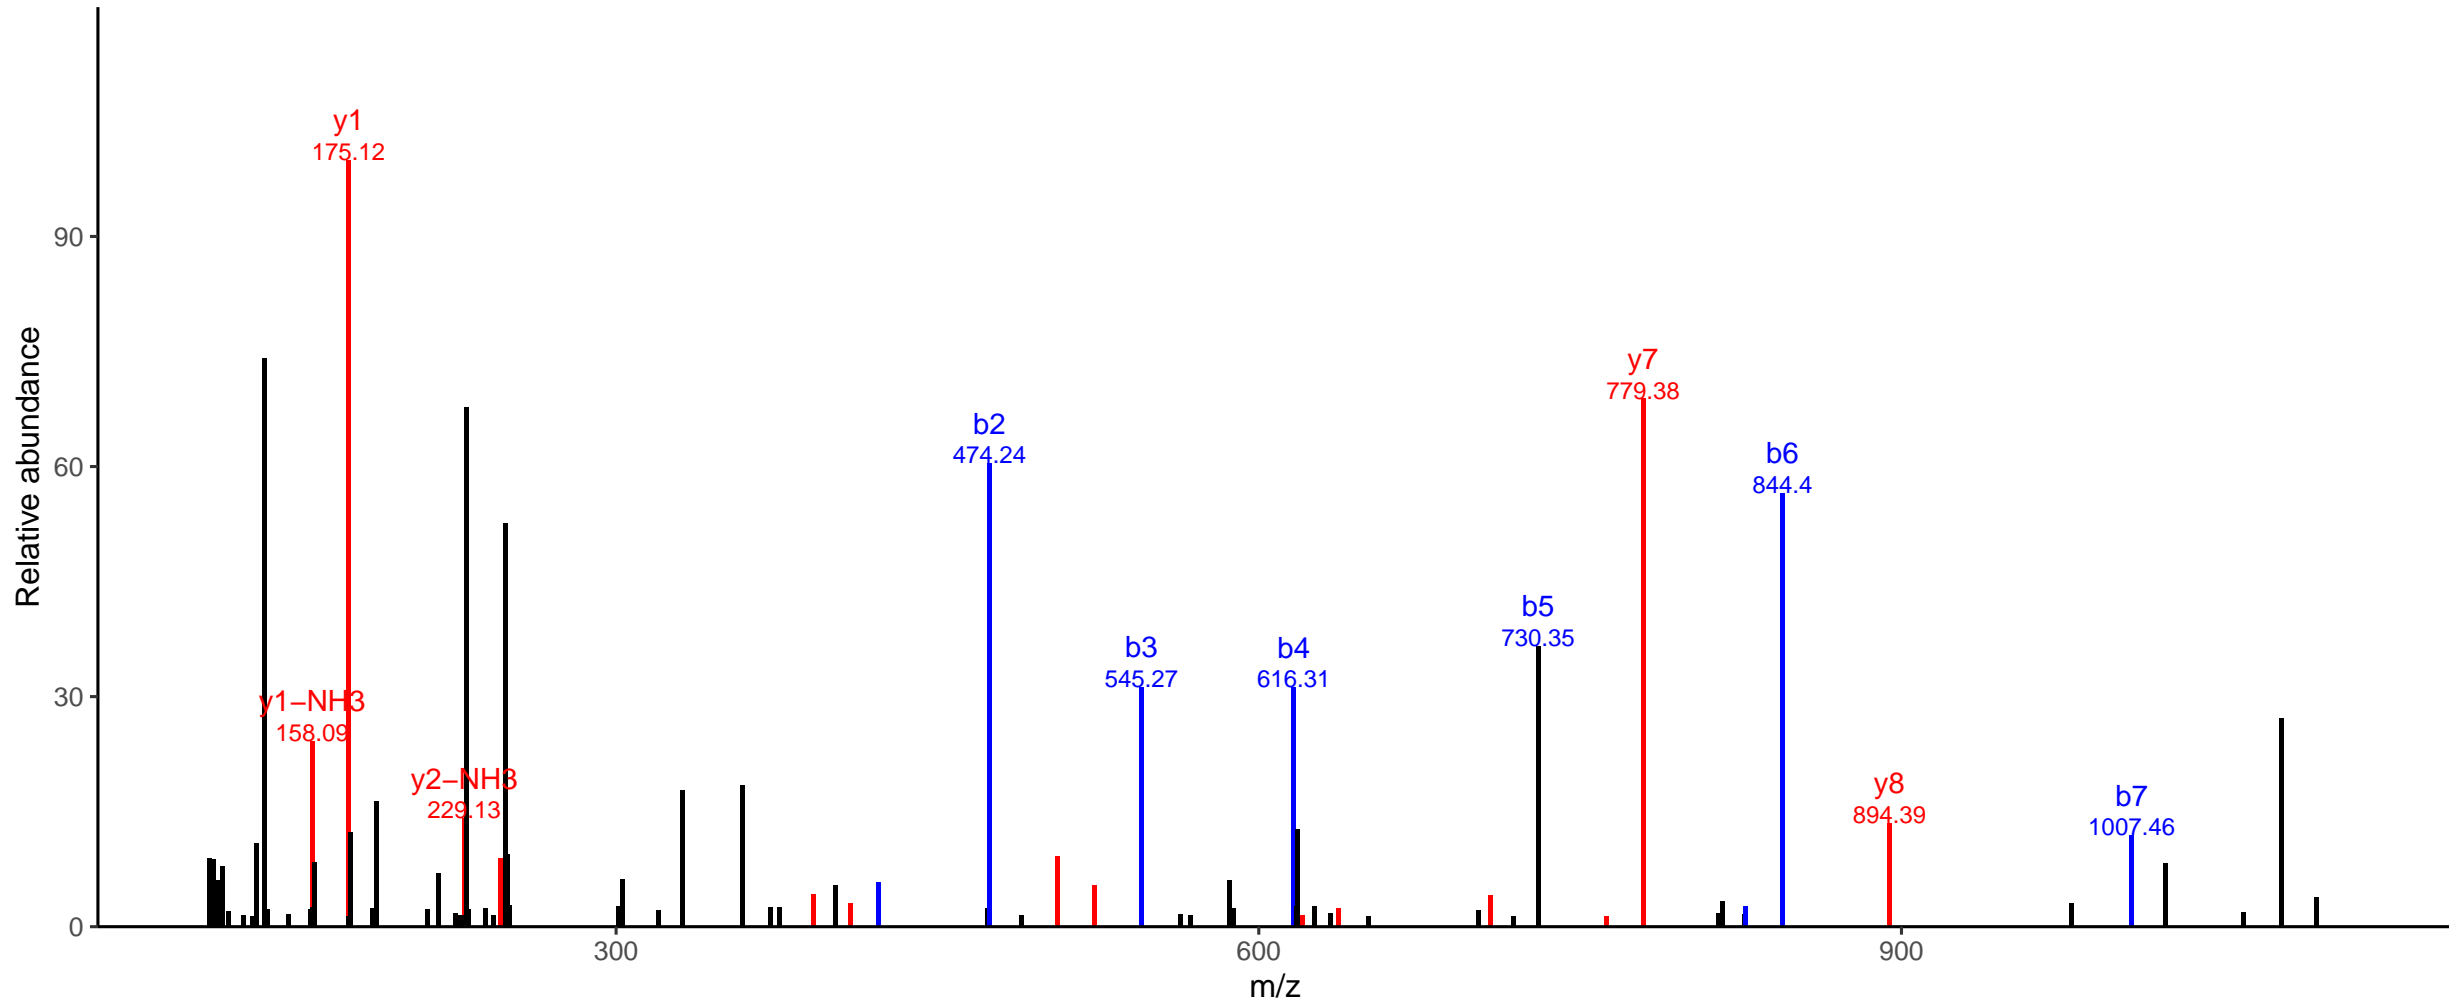

| Raw file  | Scan number | Mass analyzer | Score  | m/z      | Proteins |
|-----------|-------------|---------------|--------|----------|----------|
| 7610TQ_14 | 12810       | FTMS          | 105.14 | 476.2395 | Q8TD08   |

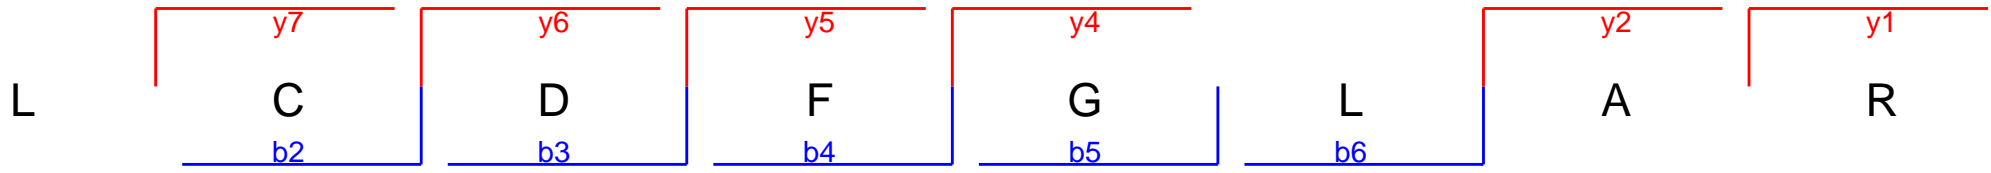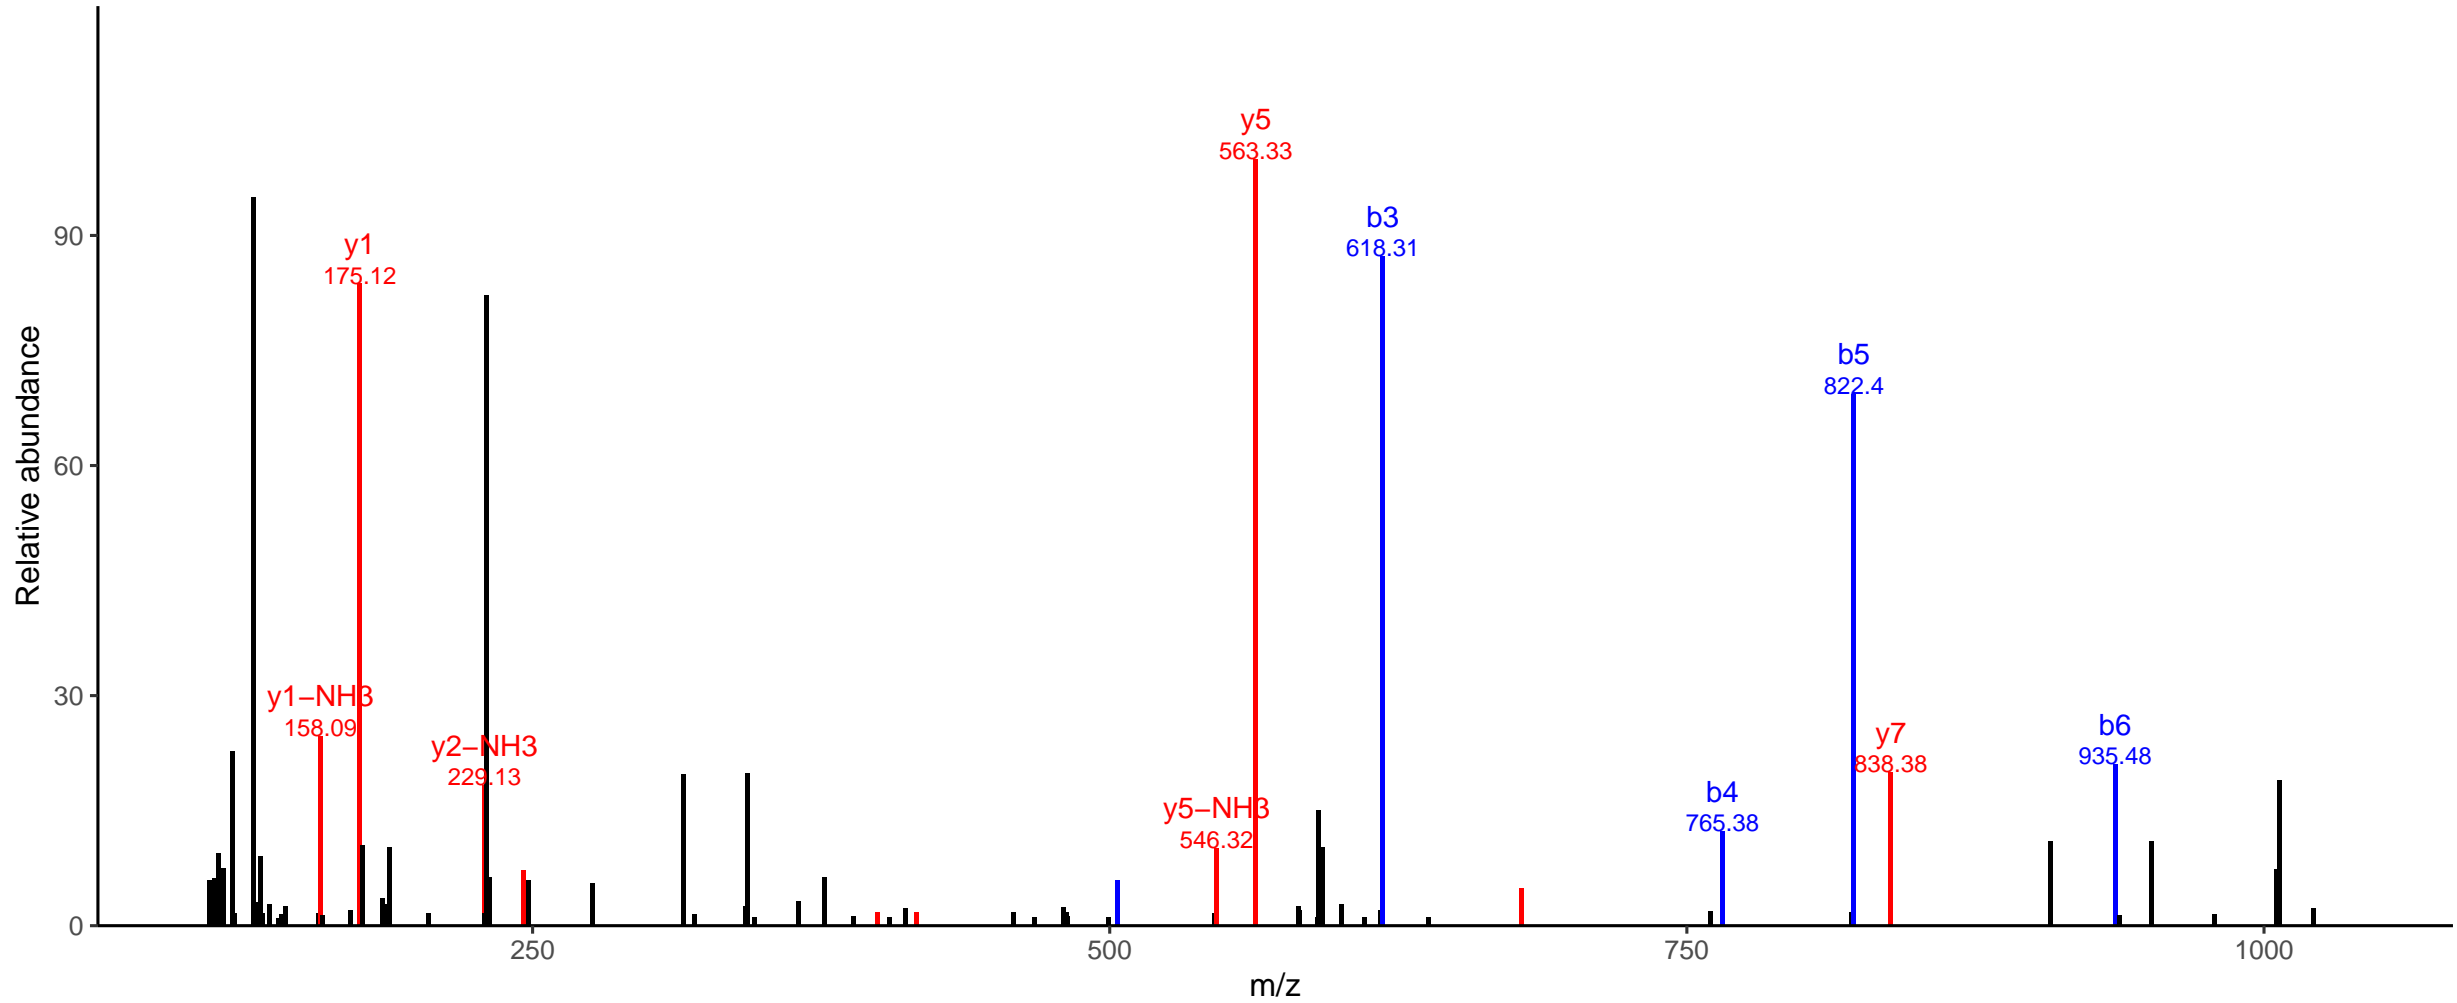

| Raw file  | Scan number | Mass analyzer | Score  | m/z      | Proteins |
|-----------|-------------|---------------|--------|----------|----------|
| 7610TQ_13 | 4231        | FTMS          | 91.202 | 465.2262 | Q8WUH6   |

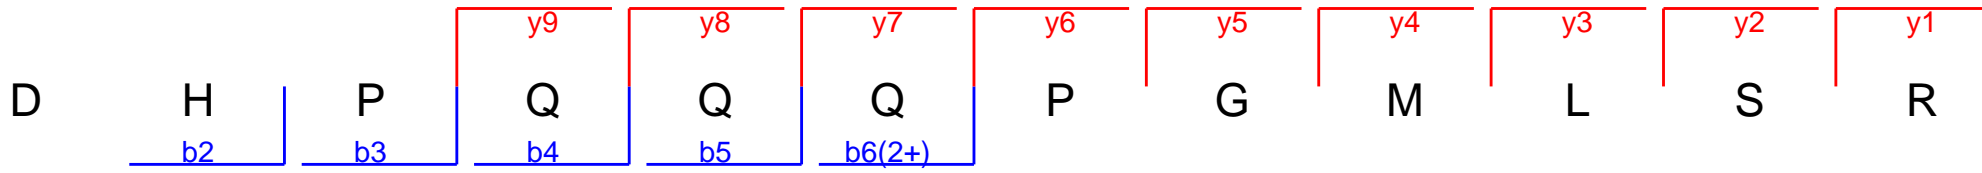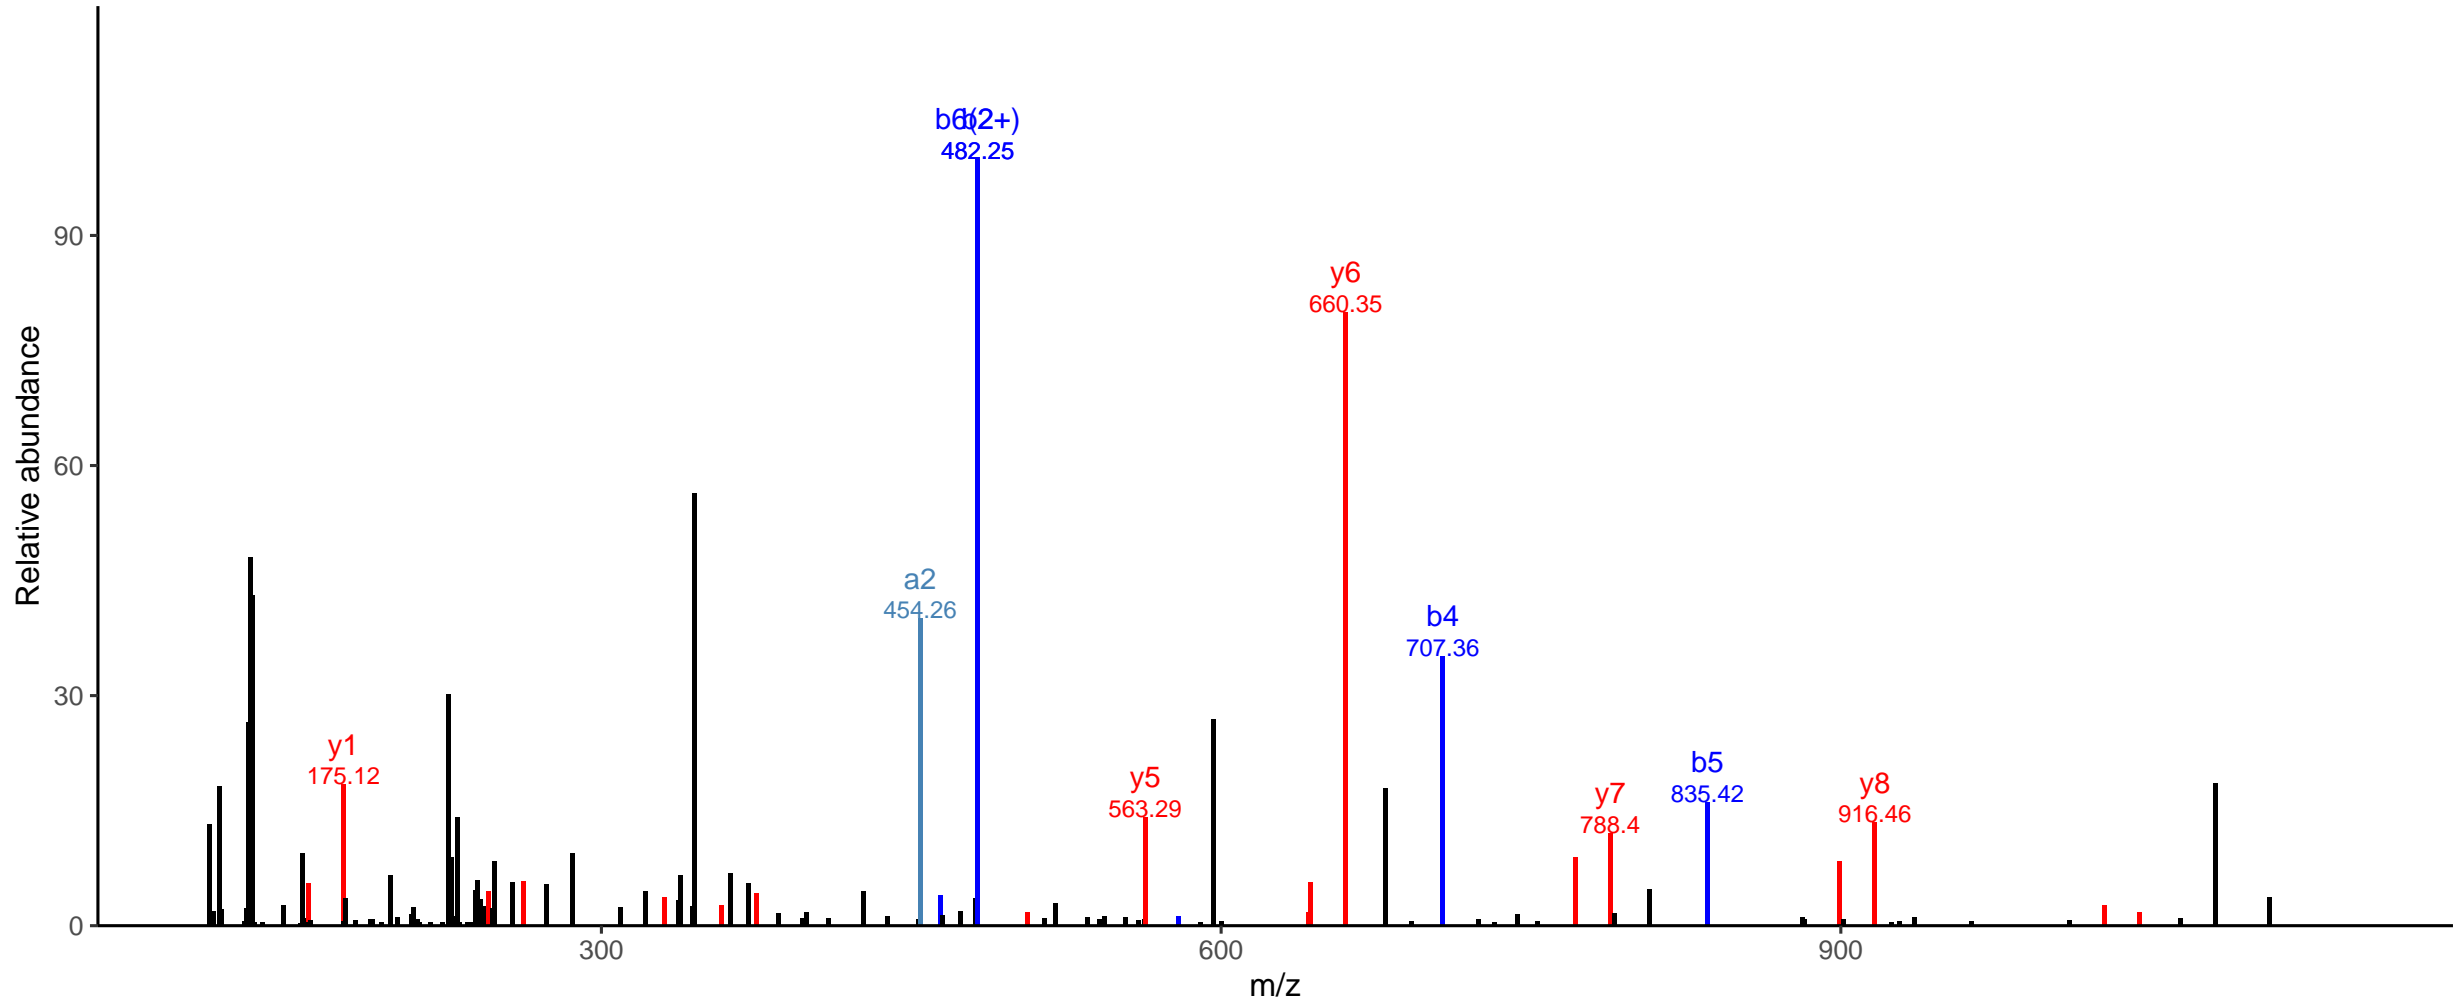

| Raw file | Scan number | Mass analyzer | Score  | m/z      | Proteins |
|----------|-------------|---------------|--------|----------|----------|
| 7610TQ_1 | 14397       | FTMS          | 115.78 | 615.3117 | Q8WVY7   |

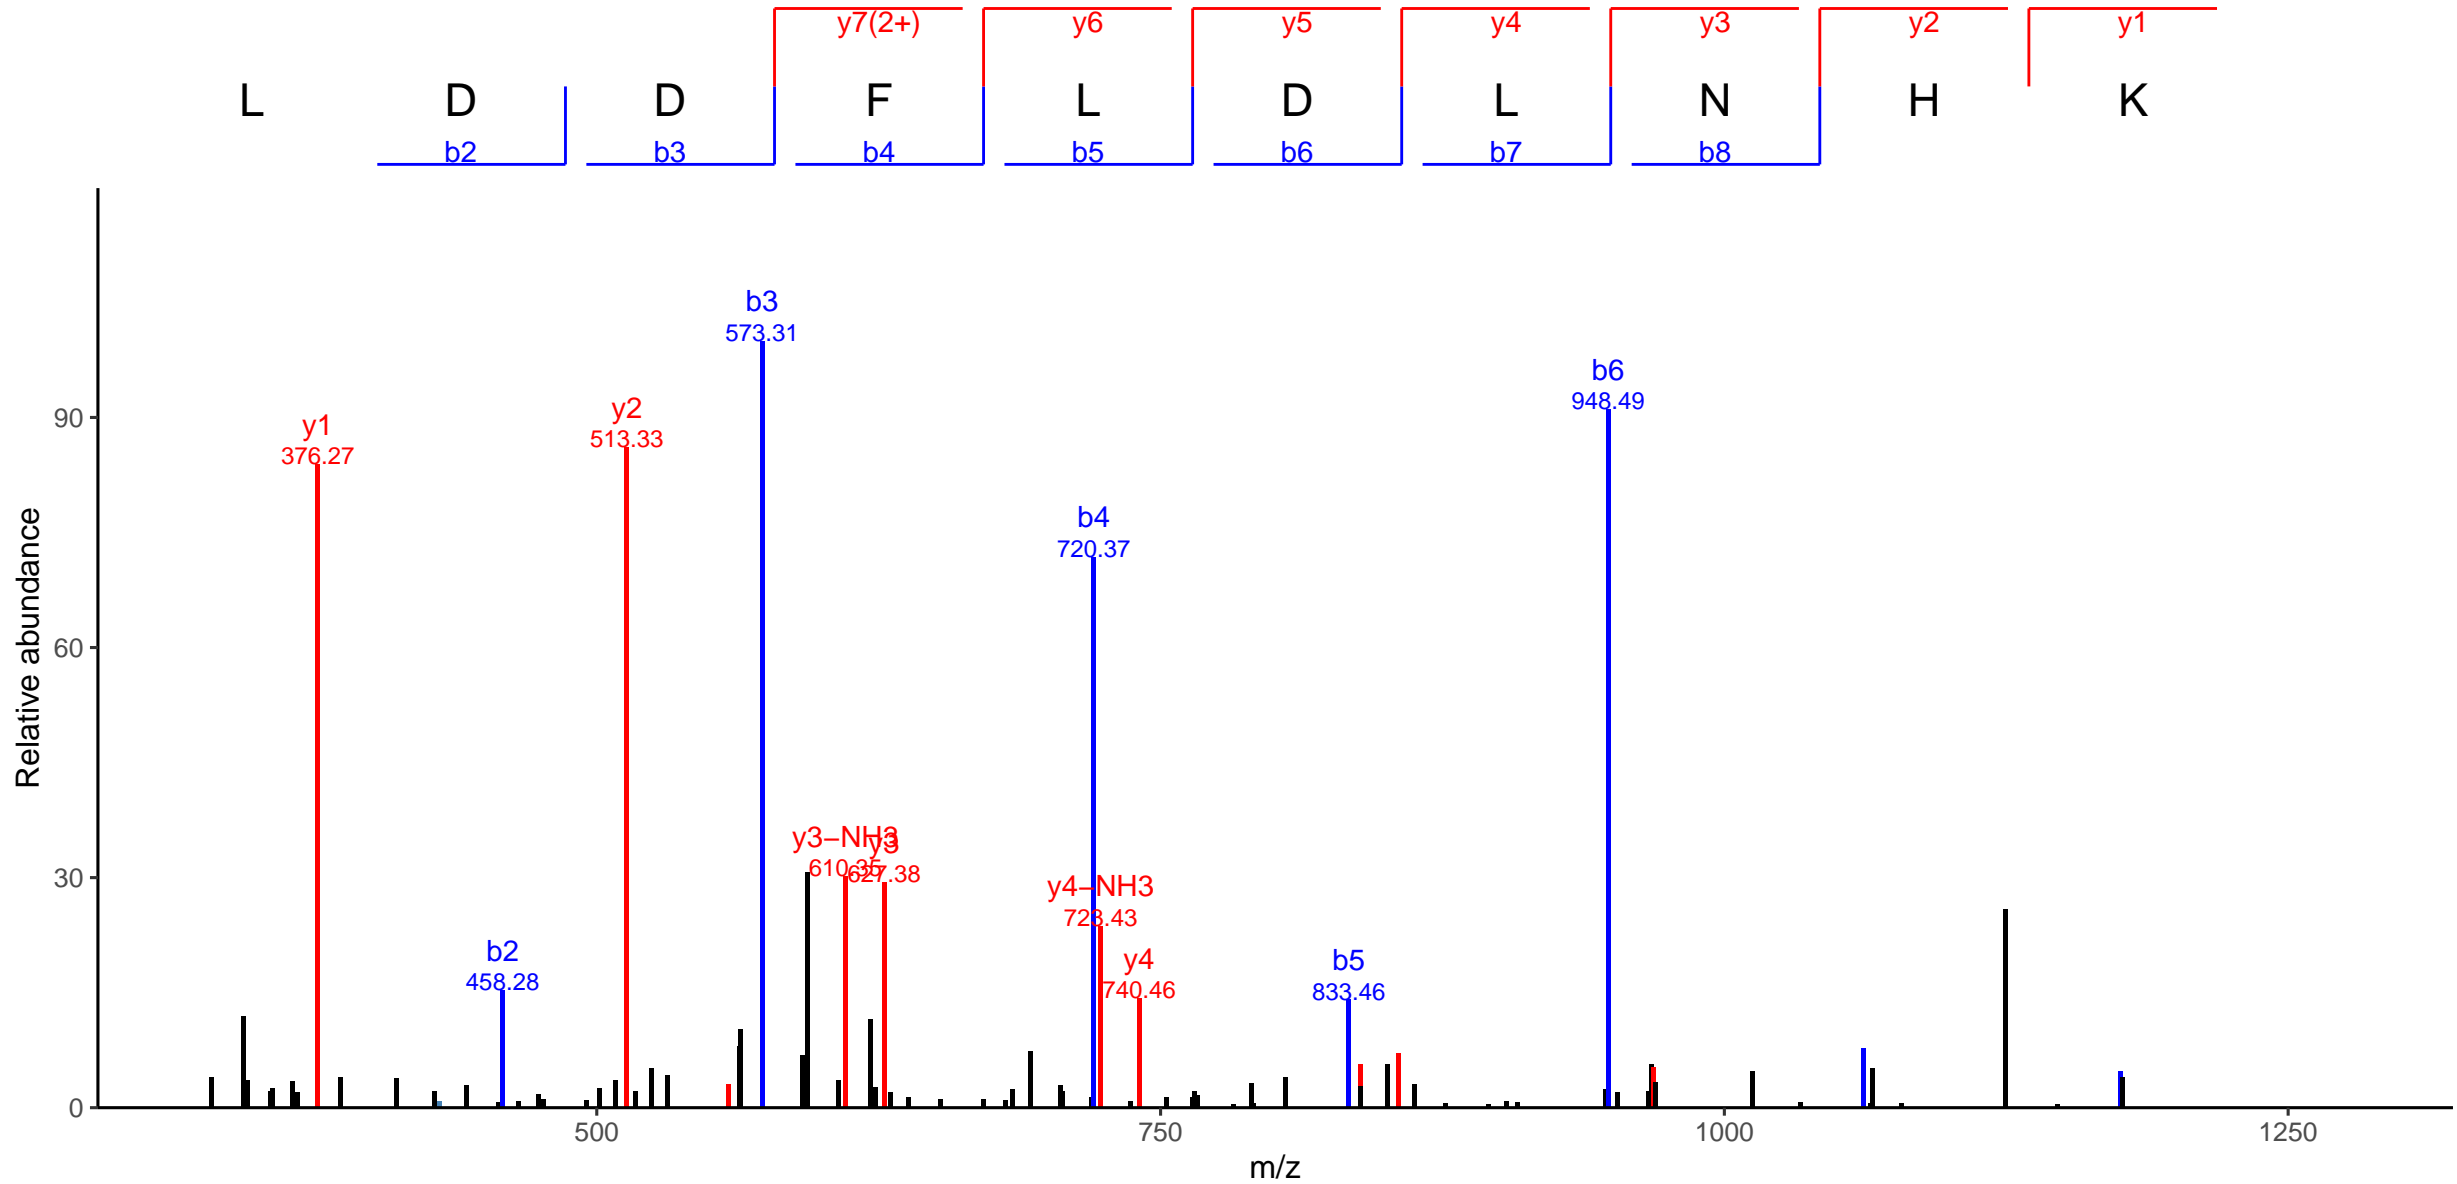

| Raw file  | Scan number | Mass analyzer | Score  | m/z      | Proteins |
|-----------|-------------|---------------|--------|----------|----------|
| 7610TQ_11 | 14337       | FTMS          | 117.79 | 699.3091 | Q9BV20   |

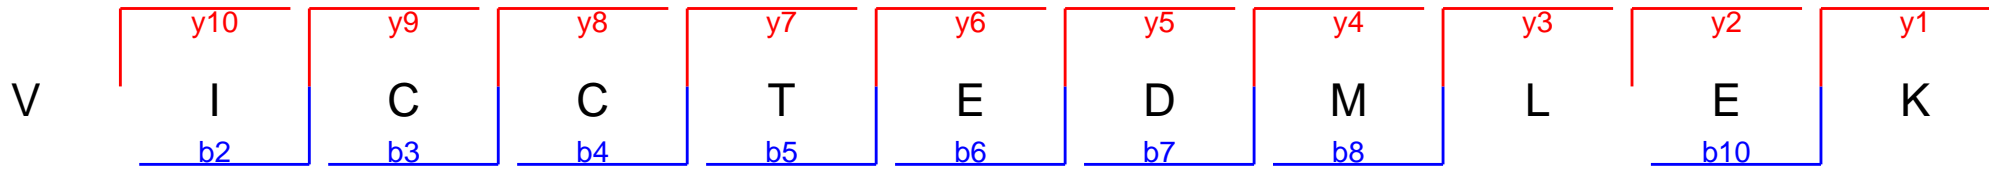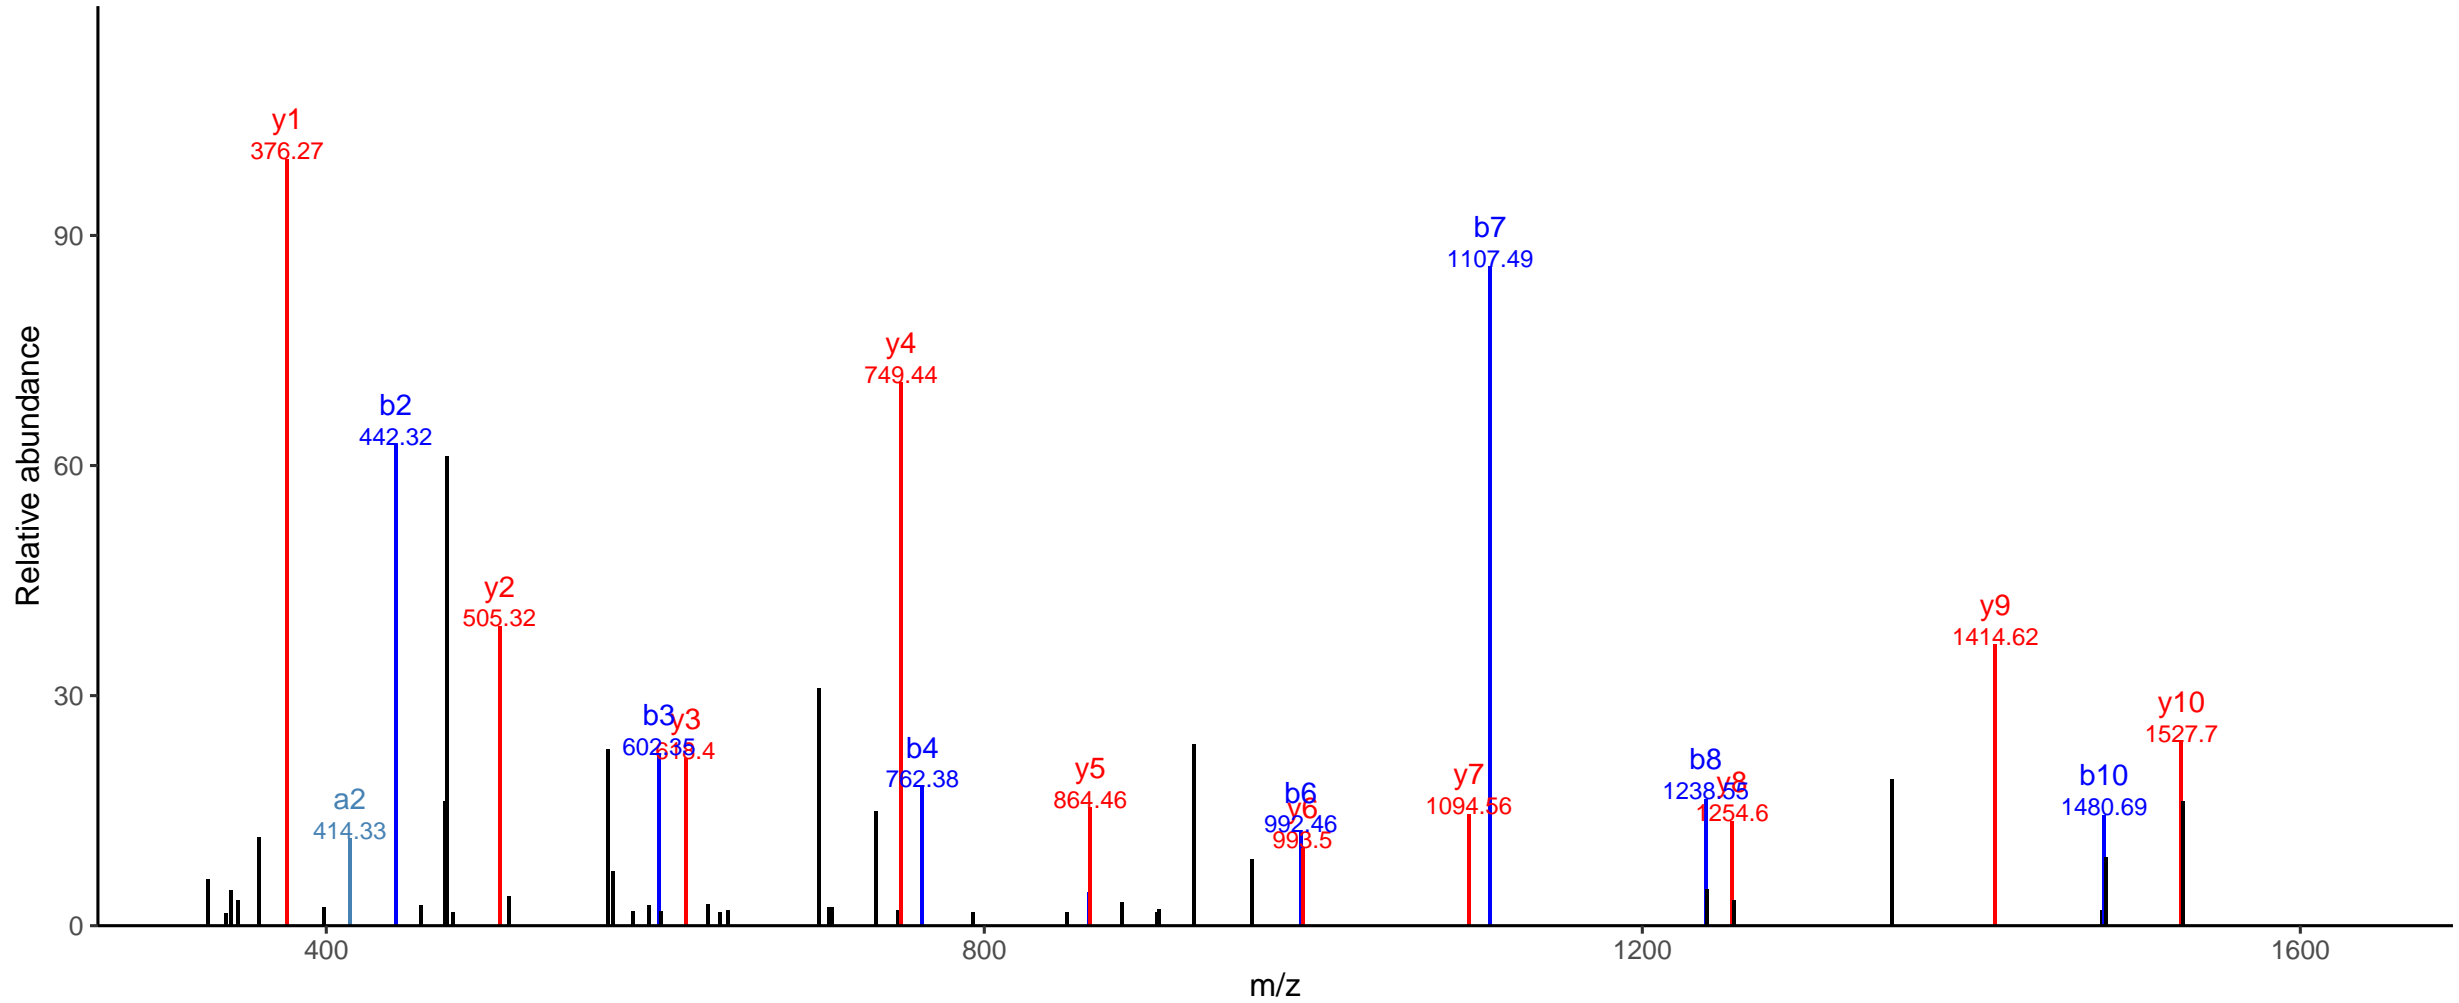



| Raw file | Scan number | Mass analyzer | Score  | m/z      | Proteins |
|----------|-------------|---------------|--------|----------|----------|
| 7610TQ_9 | 14482       | FTMS          | 161.86 | 987.4887 | Q9BY32   |

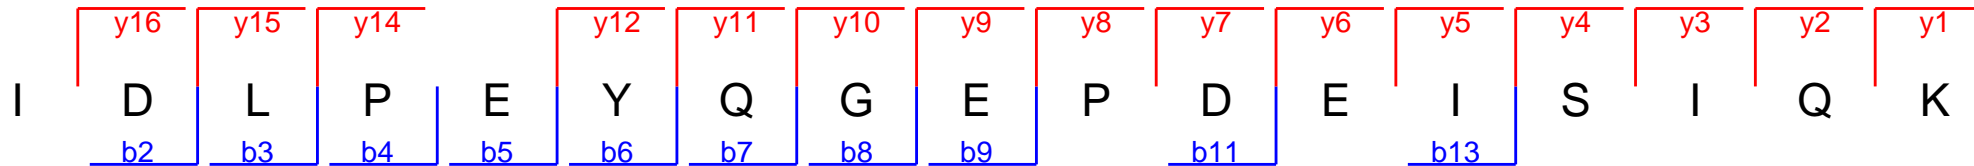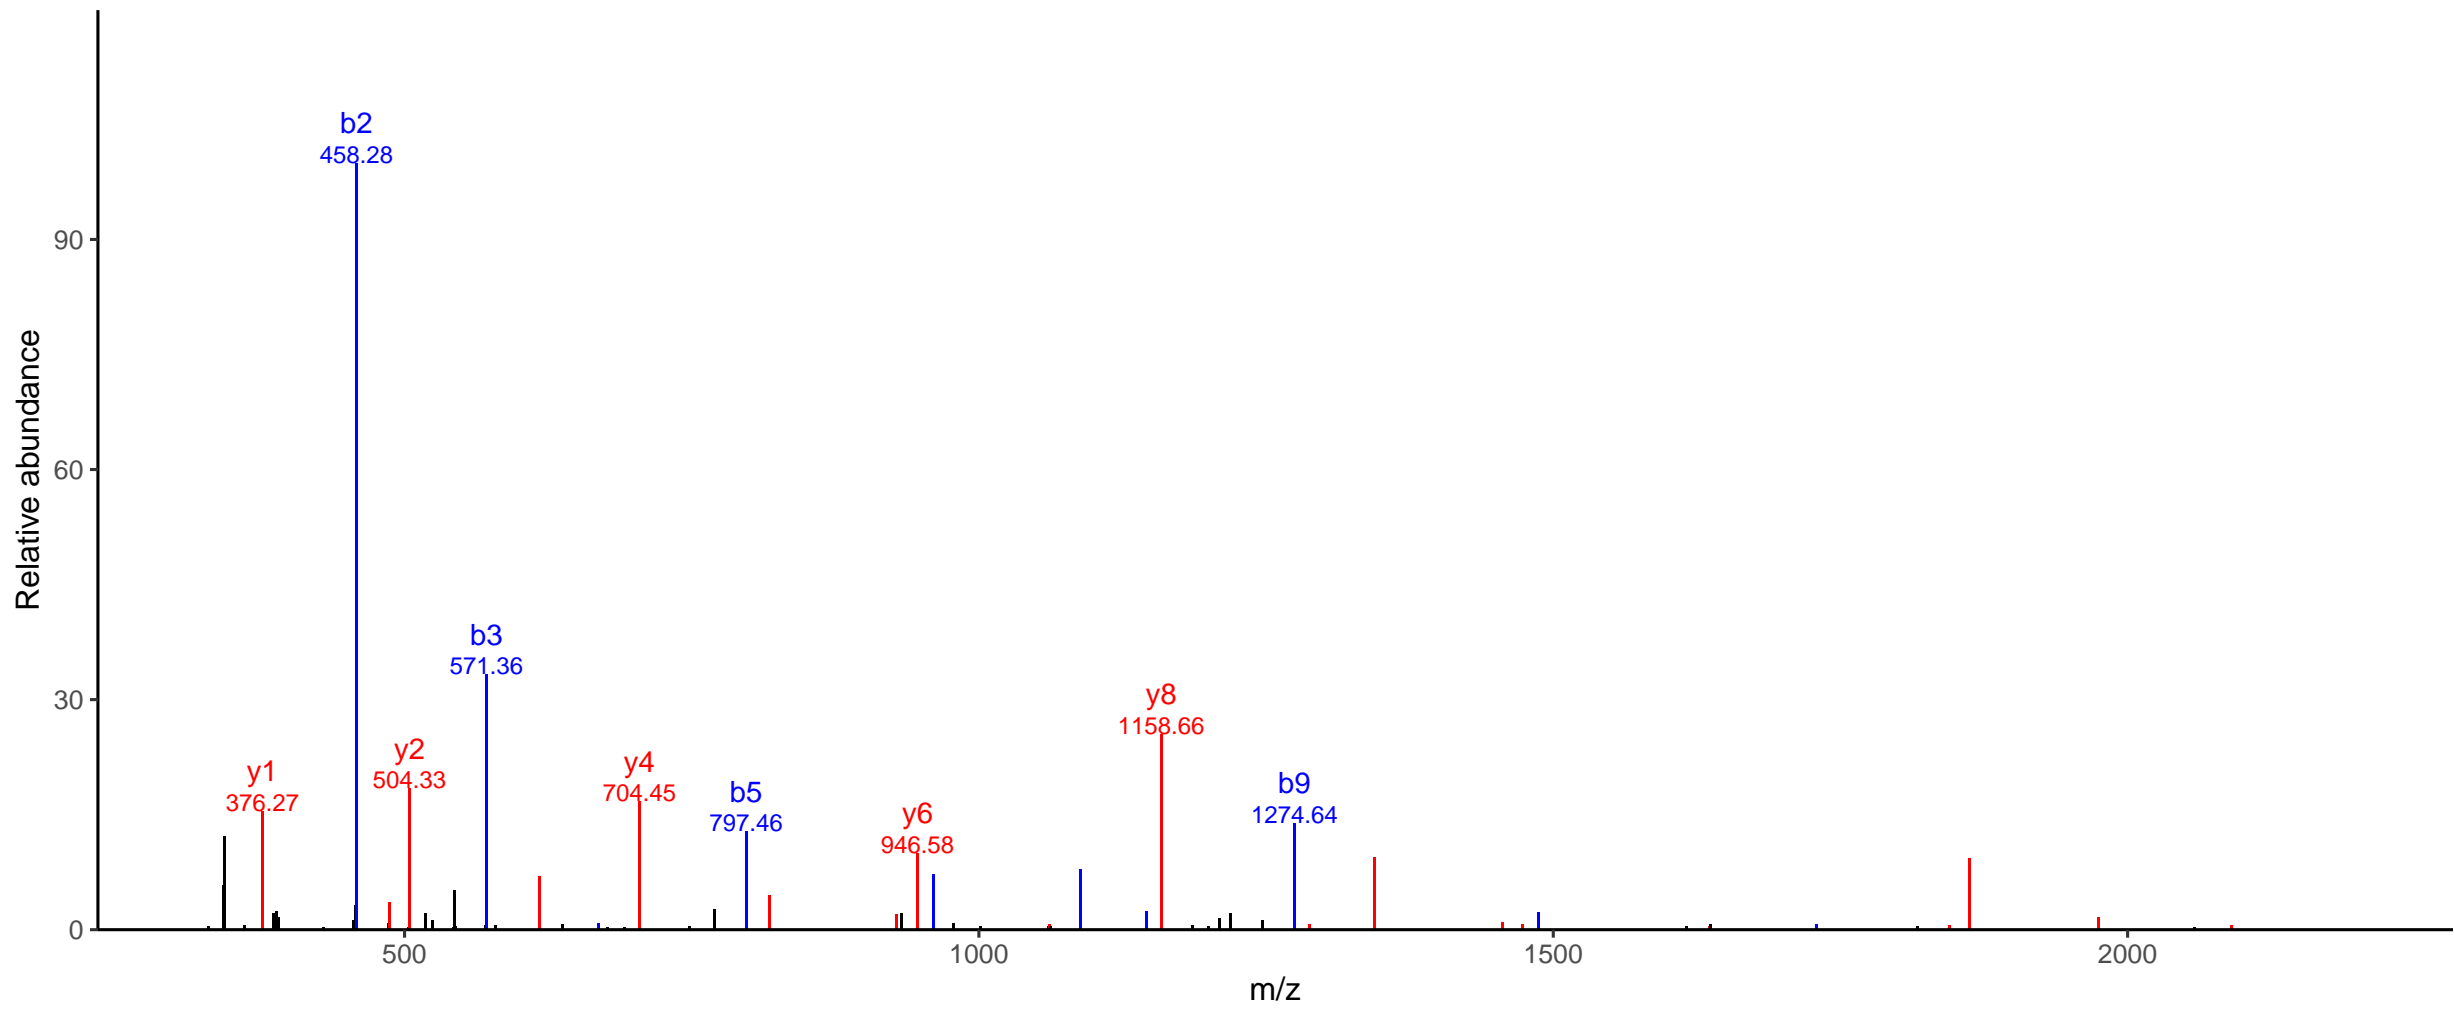

| Raw file | Scan number | Mass analyzer | Score  | m/z      | Proteins |
|----------|-------------|---------------|--------|----------|----------|
| 7610TQ_5 | 14949       | FTMS          | 136.02 | 1154.576 | Q9HBL7   |

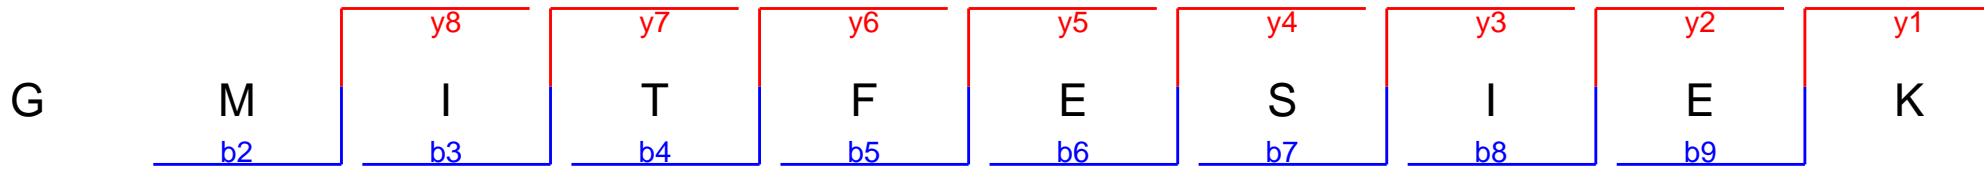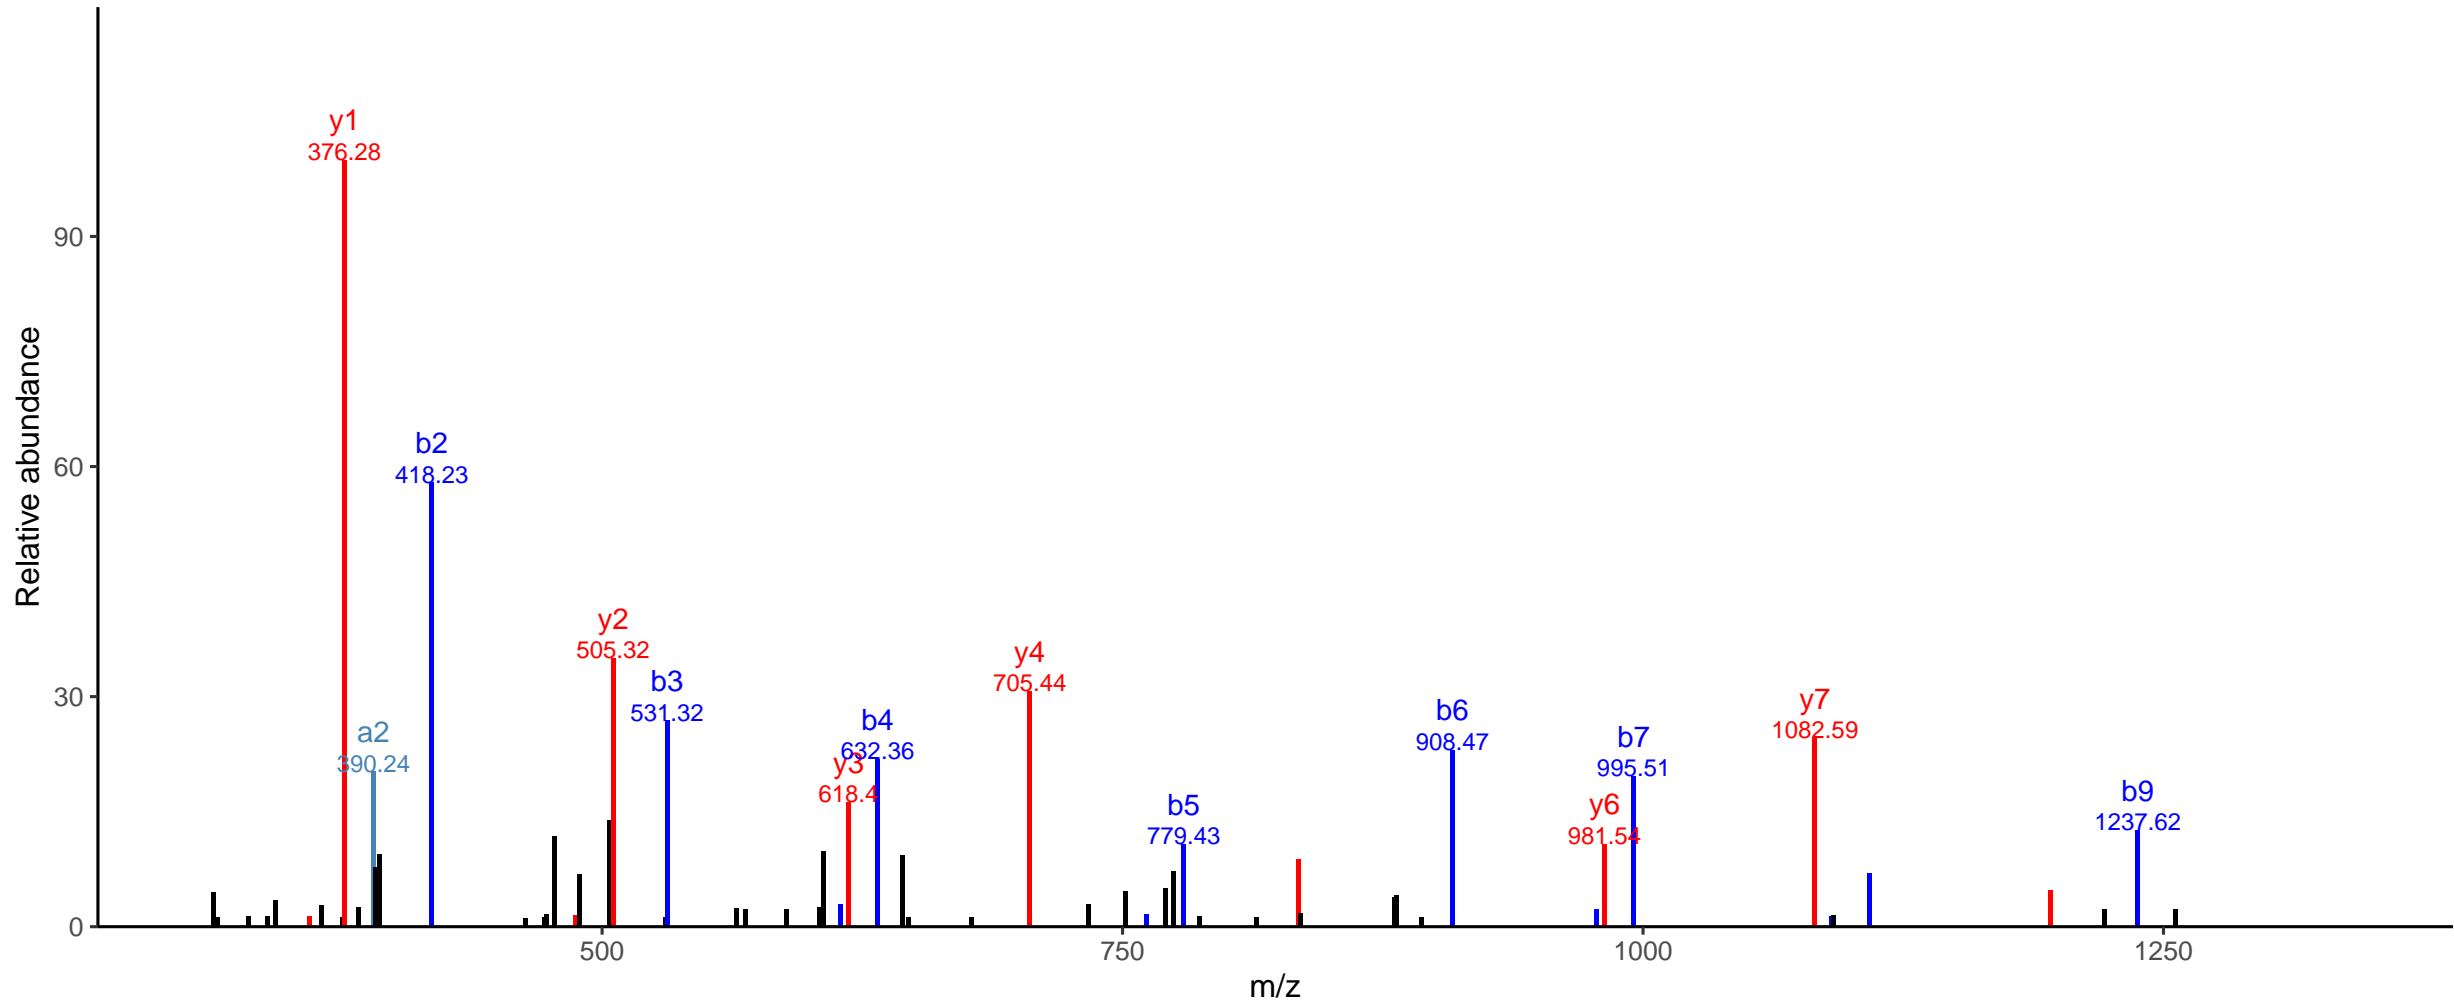

| Raw file | Scan number | Mass analyzer | Score  | m/z      | Proteins |
|----------|-------------|---------------|--------|----------|----------|
| 7610TQ_6 | 16895       | FTMS          | 113.38 | 714.8996 | Q9NRP0   |

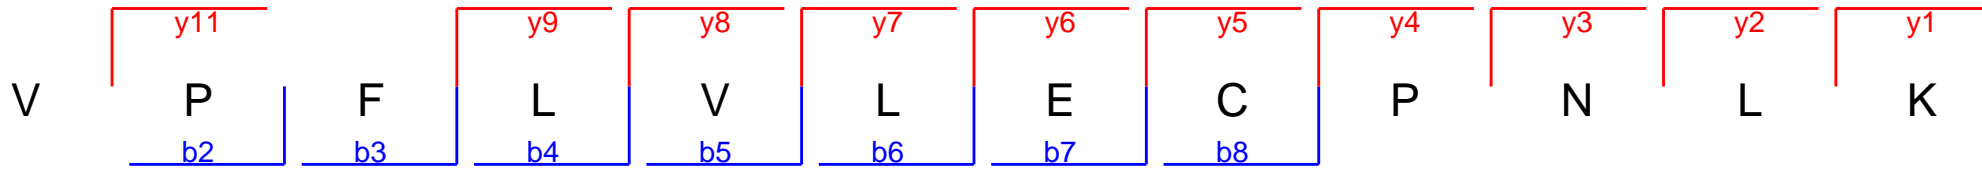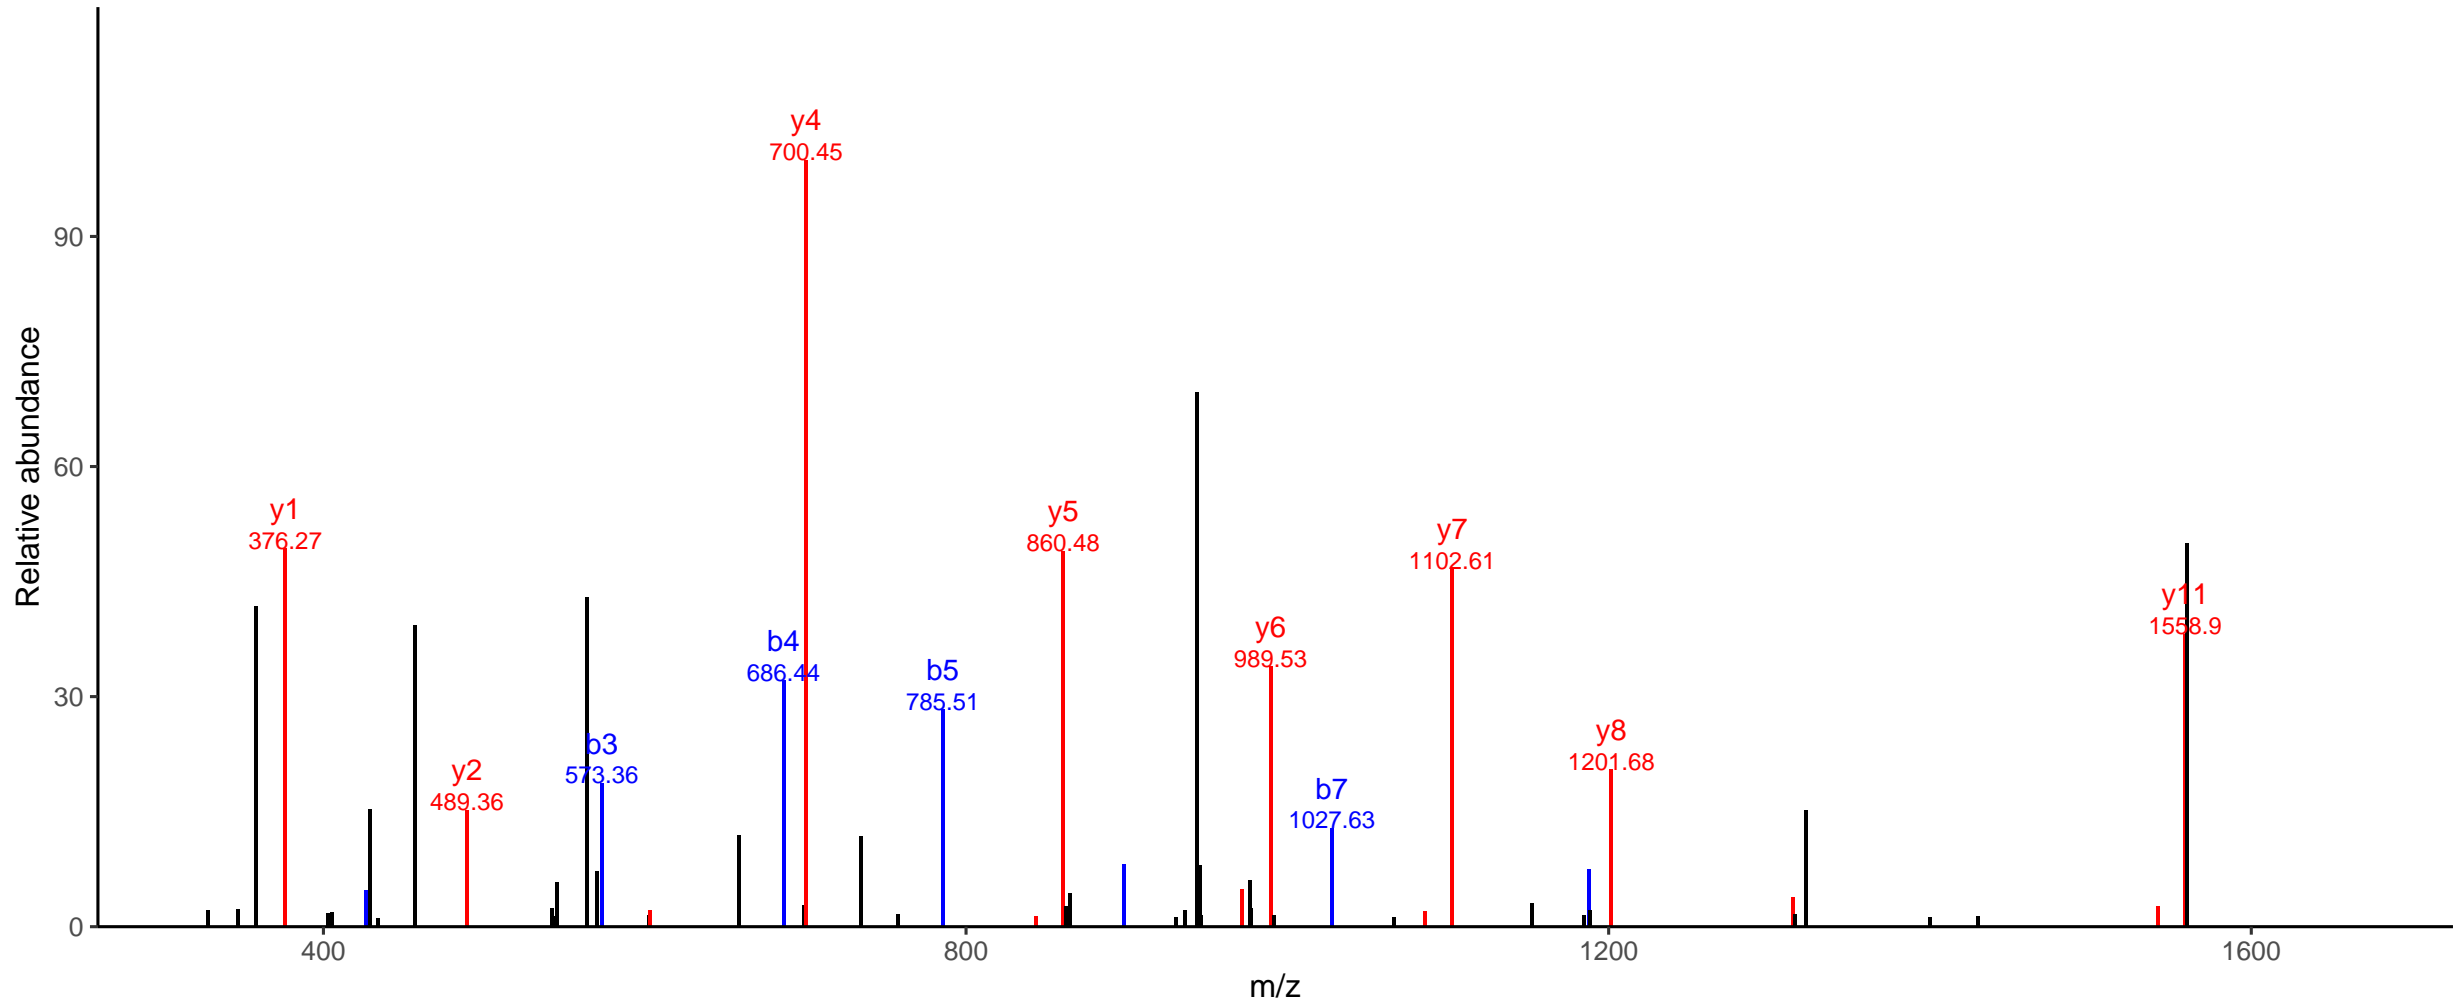

| Raw file  | Scan number | Mass analyzer | Score  | m/z     | Proteins      |
|-----------|-------------|---------------|--------|---------|---------------|
| 7610TQ_14 | 12804       | FTMS          | 125.54 | 1224.56 | O95747;Q9UEW8 |

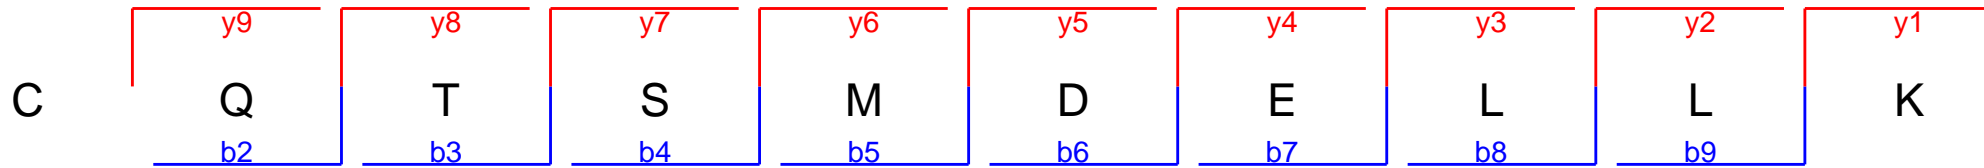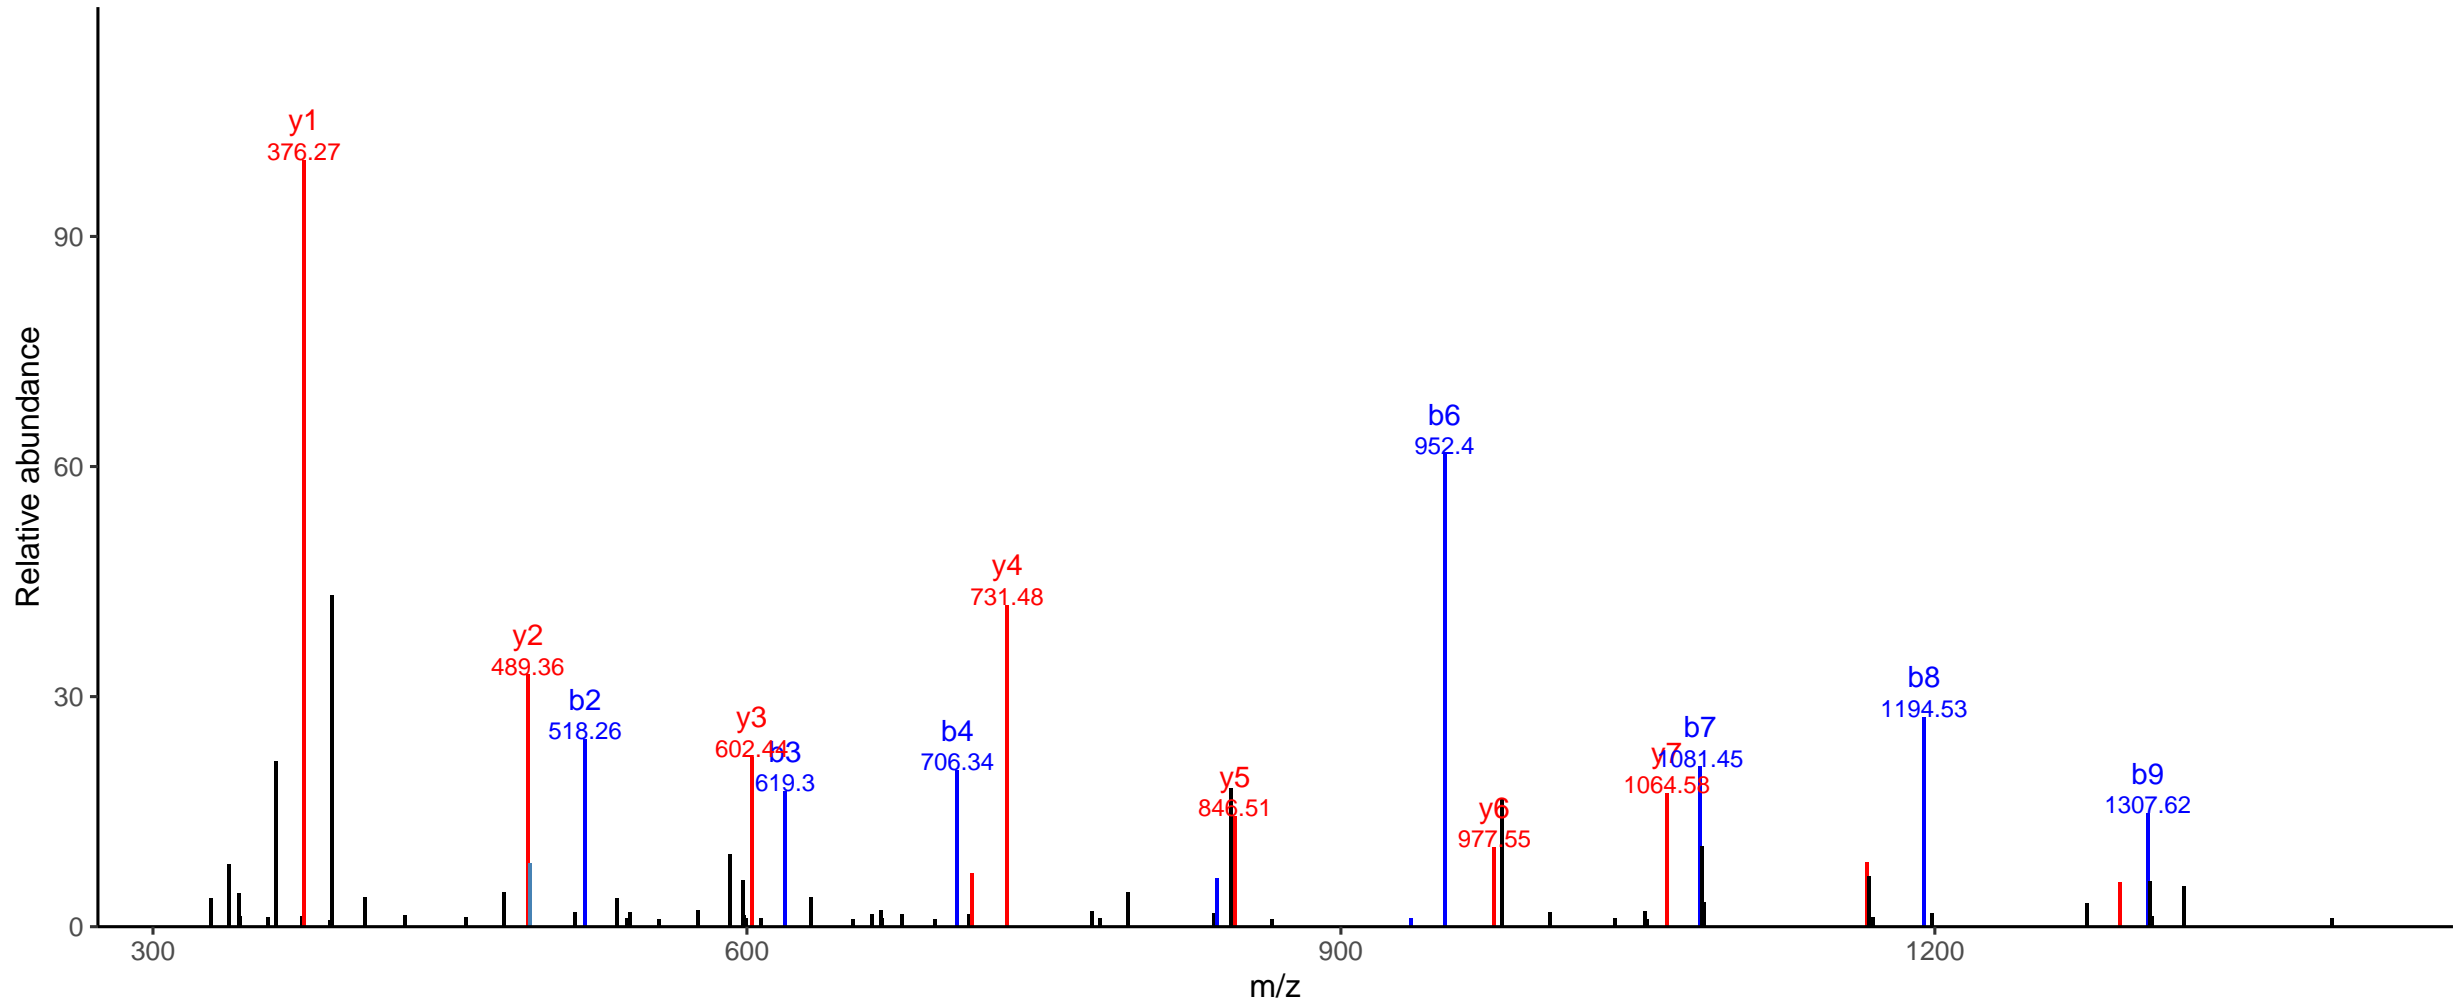

| Raw file  | Scan number | Mass analyzer | Score  | m/z      | Proteins |
|-----------|-------------|---------------|--------|----------|----------|
| 7610TQ_13 | 16494       | FTMS          | 158.04 | 1260.705 | Q9UHY1   |

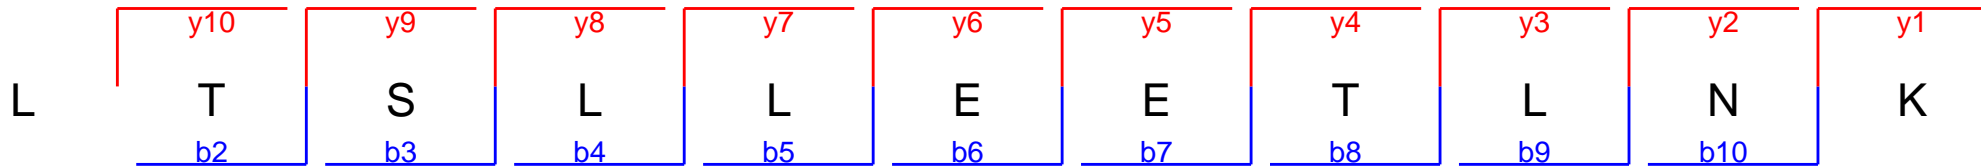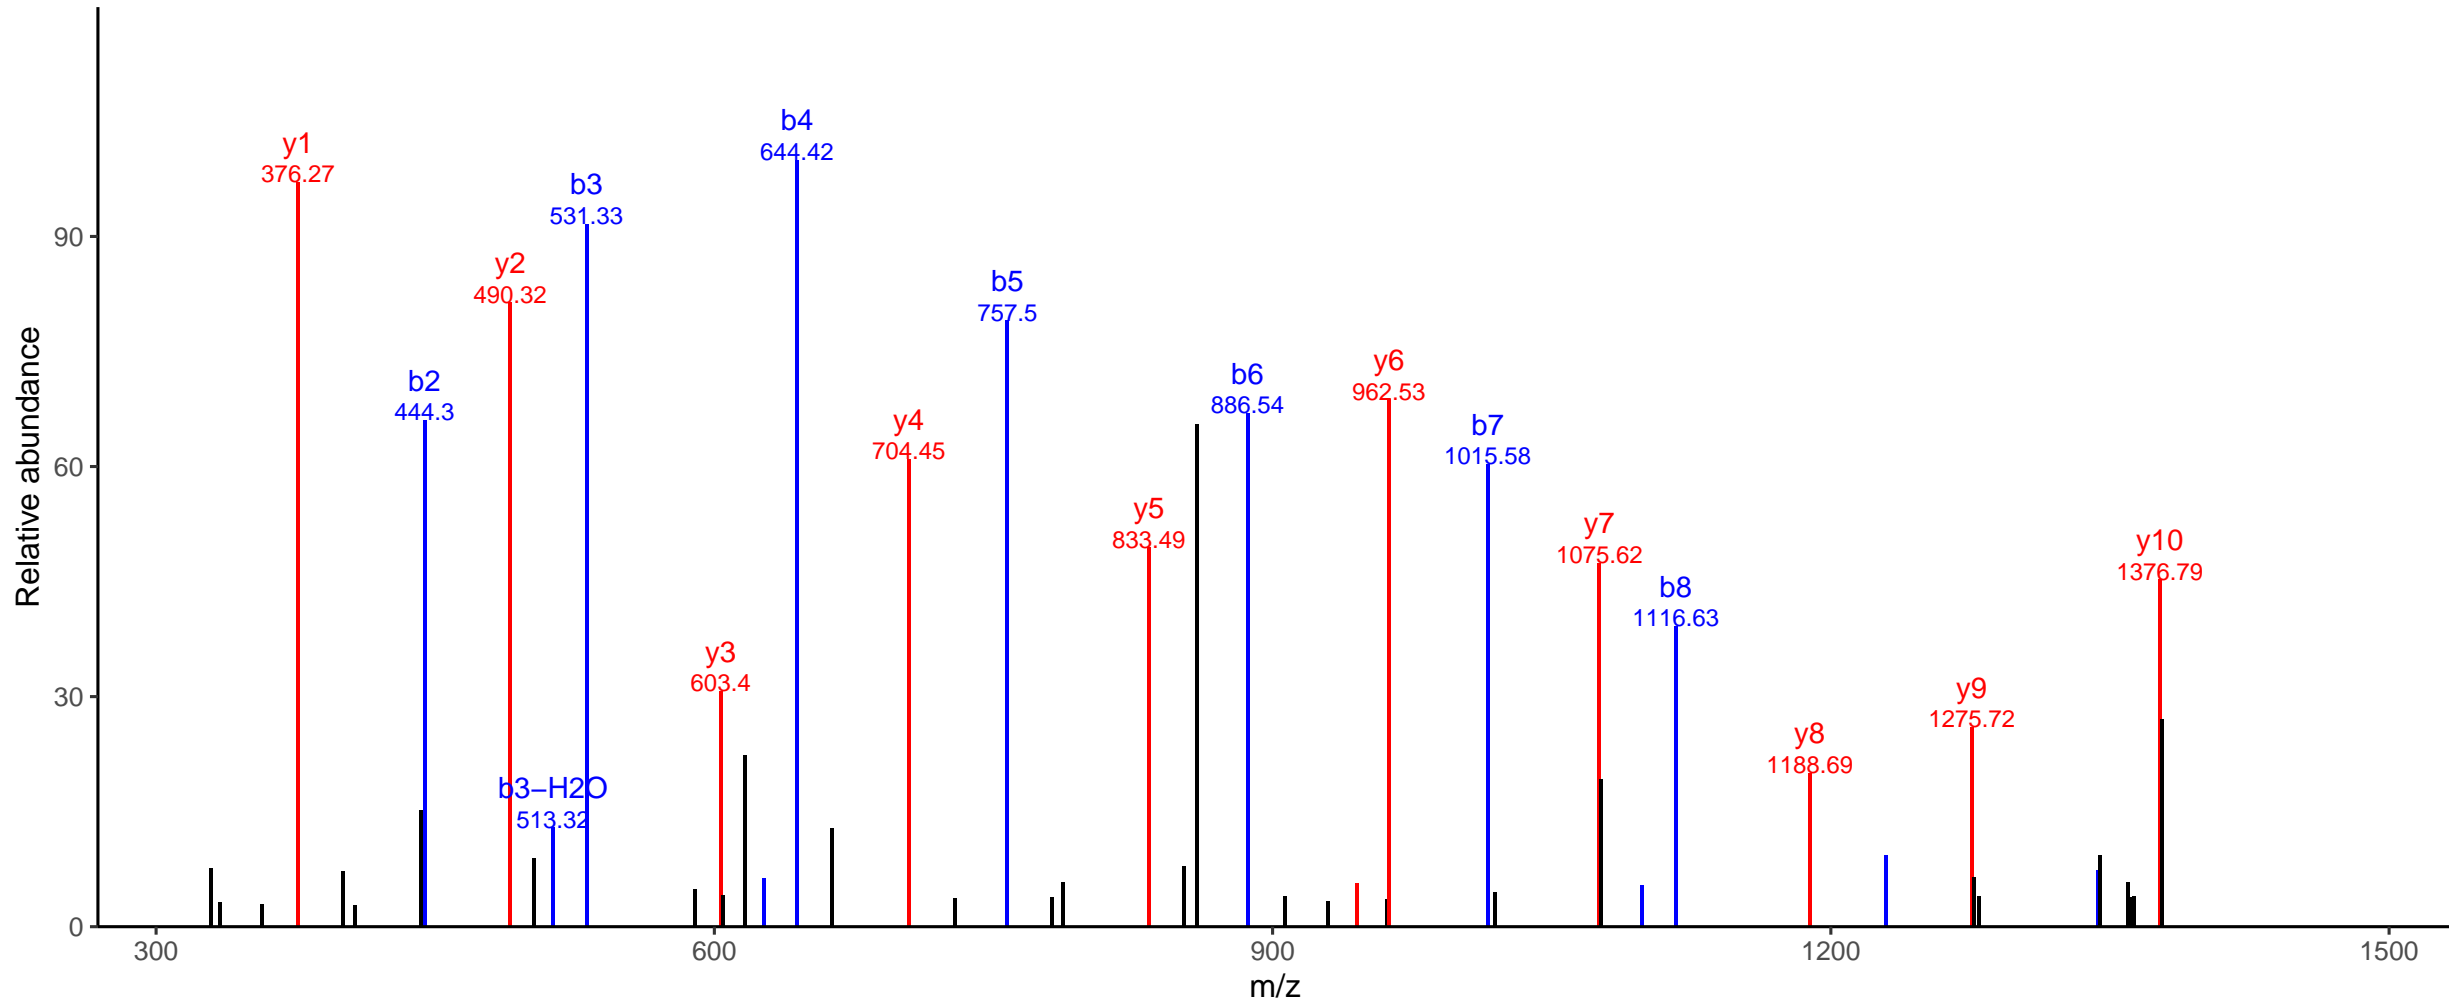

| Raw file  | Scan number | Mass analyzer | Score | m/z      | Proteins      |
|-----------|-------------|---------------|-------|----------|---------------|
| 7610TQ_16 | 8386        | FTMS          | 131.4 | 692.3108 | P37802;Q9UI15 |

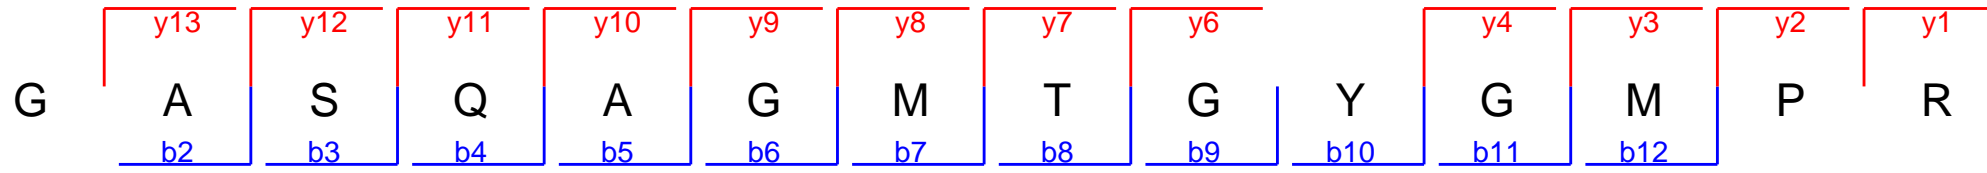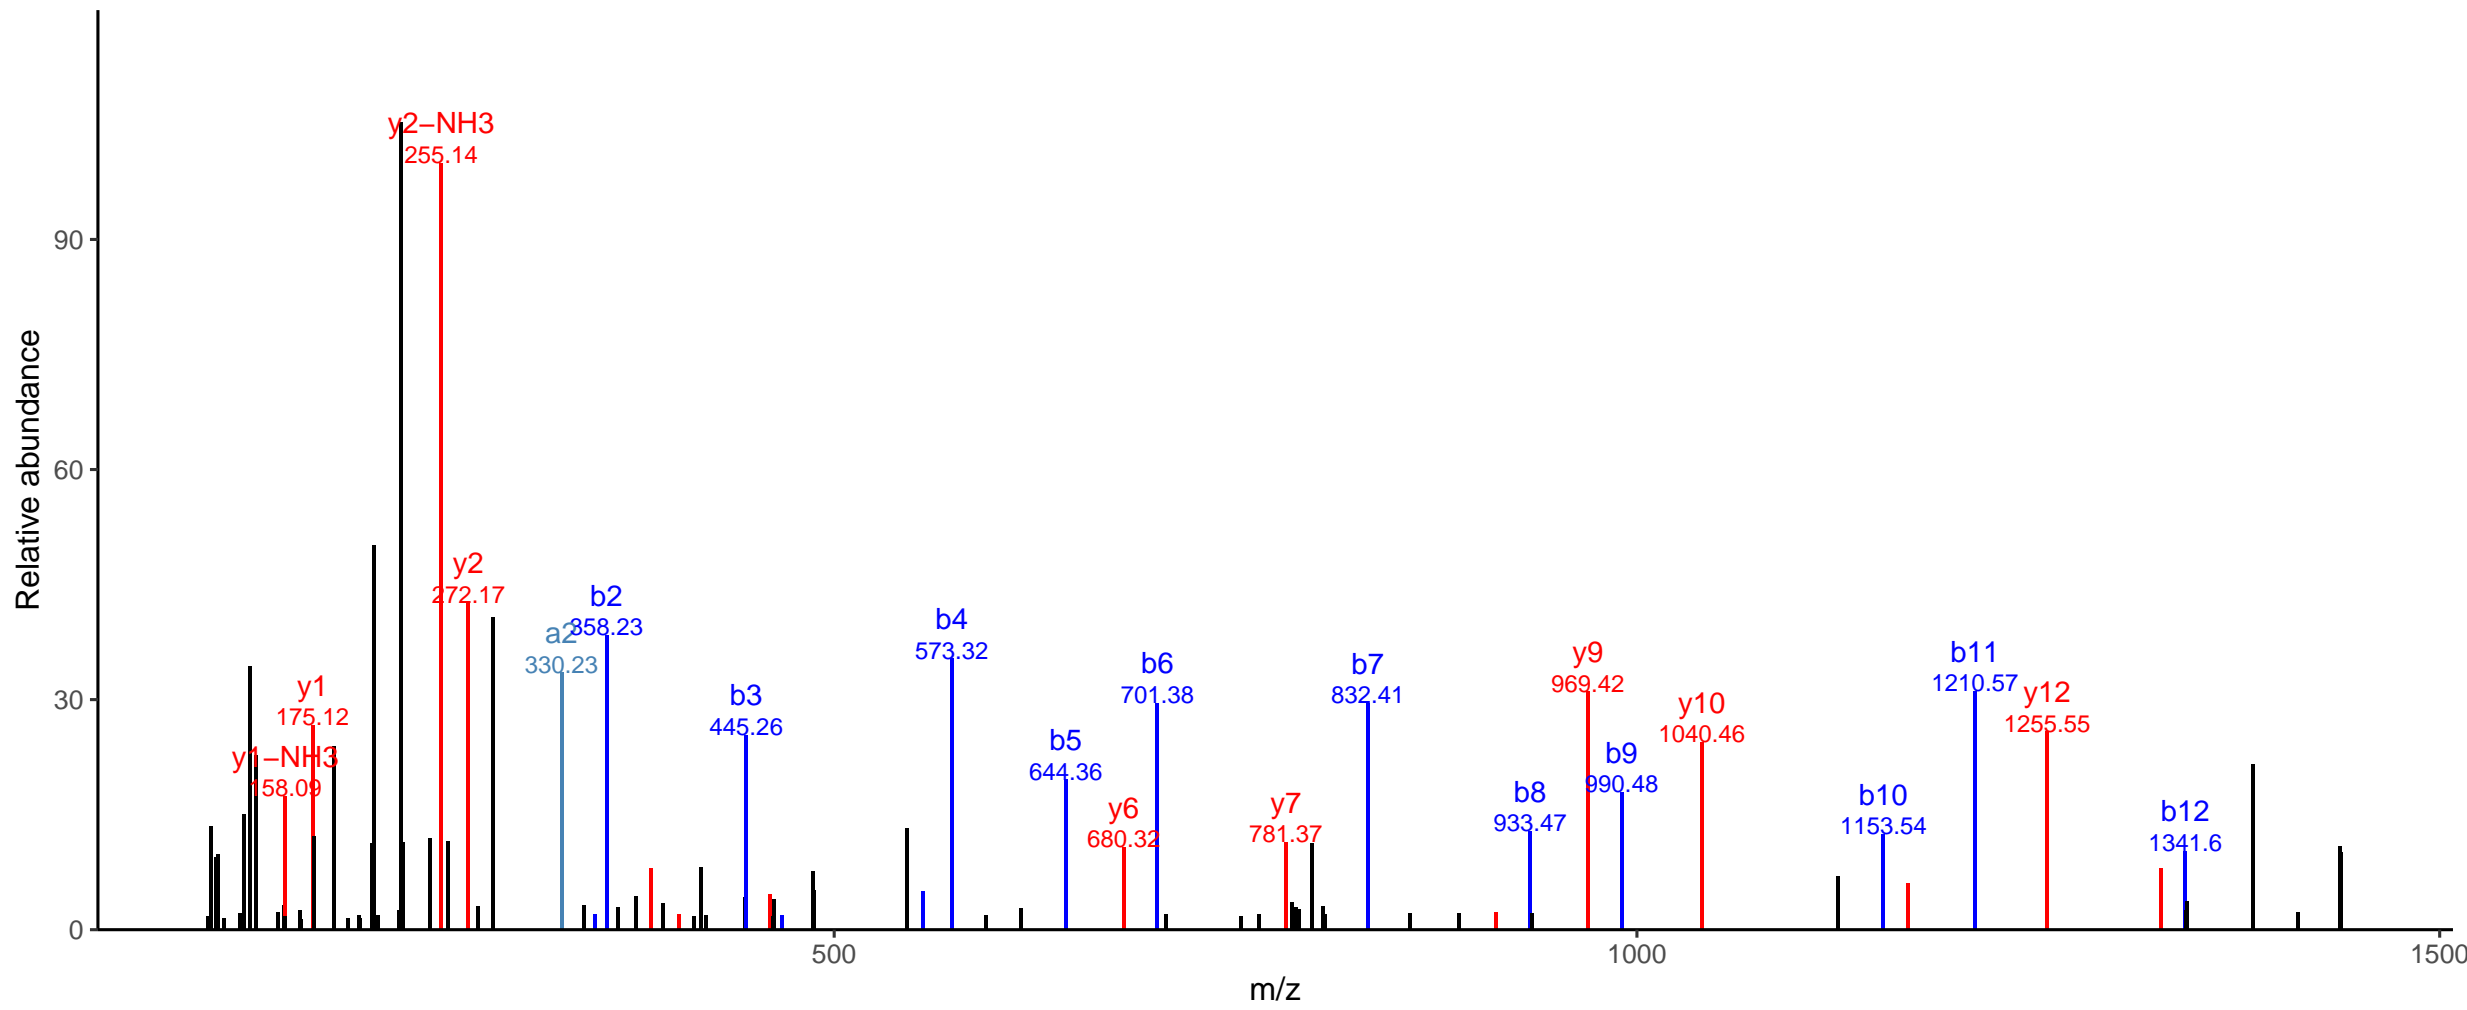

| Raw file | Scan number | Mass analyzer | Score  | m/z      | Proteins |
|----------|-------------|---------------|--------|----------|----------|
| 7610TQ_4 | 2286        | FTMS          | 110.63 | 415.7276 | Q9UI32   |

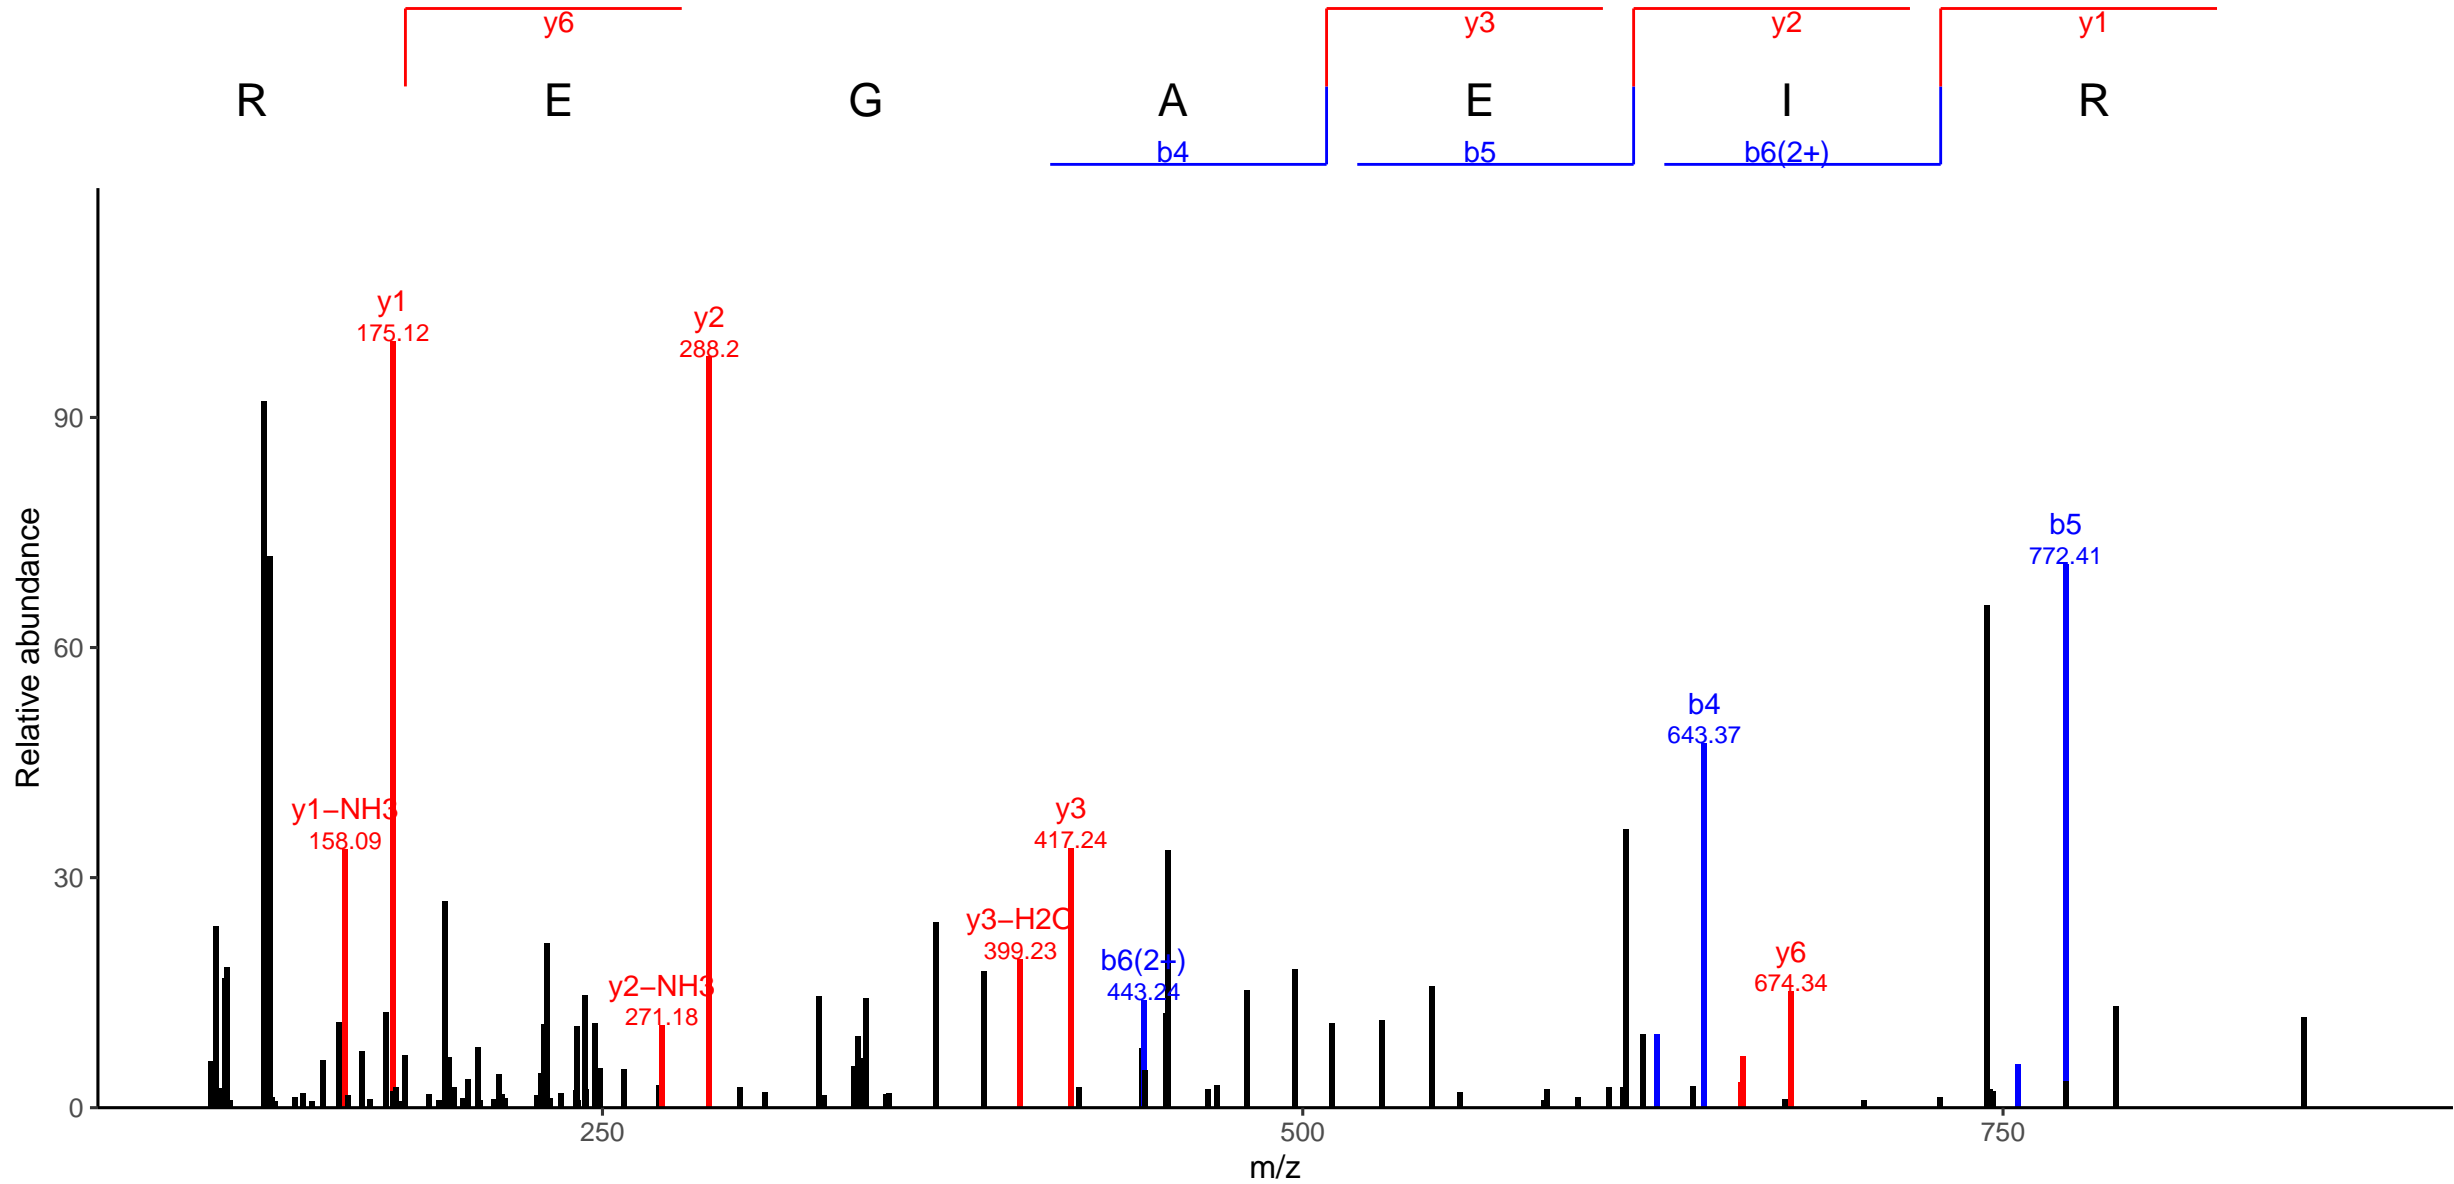

| Raw file | Scan number | Mass analyzer | Score  | m/z      | Proteins |
|----------|-------------|---------------|--------|----------|----------|
| 7610TQ_2 | 2600        | FTMS          | 60.305 | 407.1828 | Q9UUKK3  |

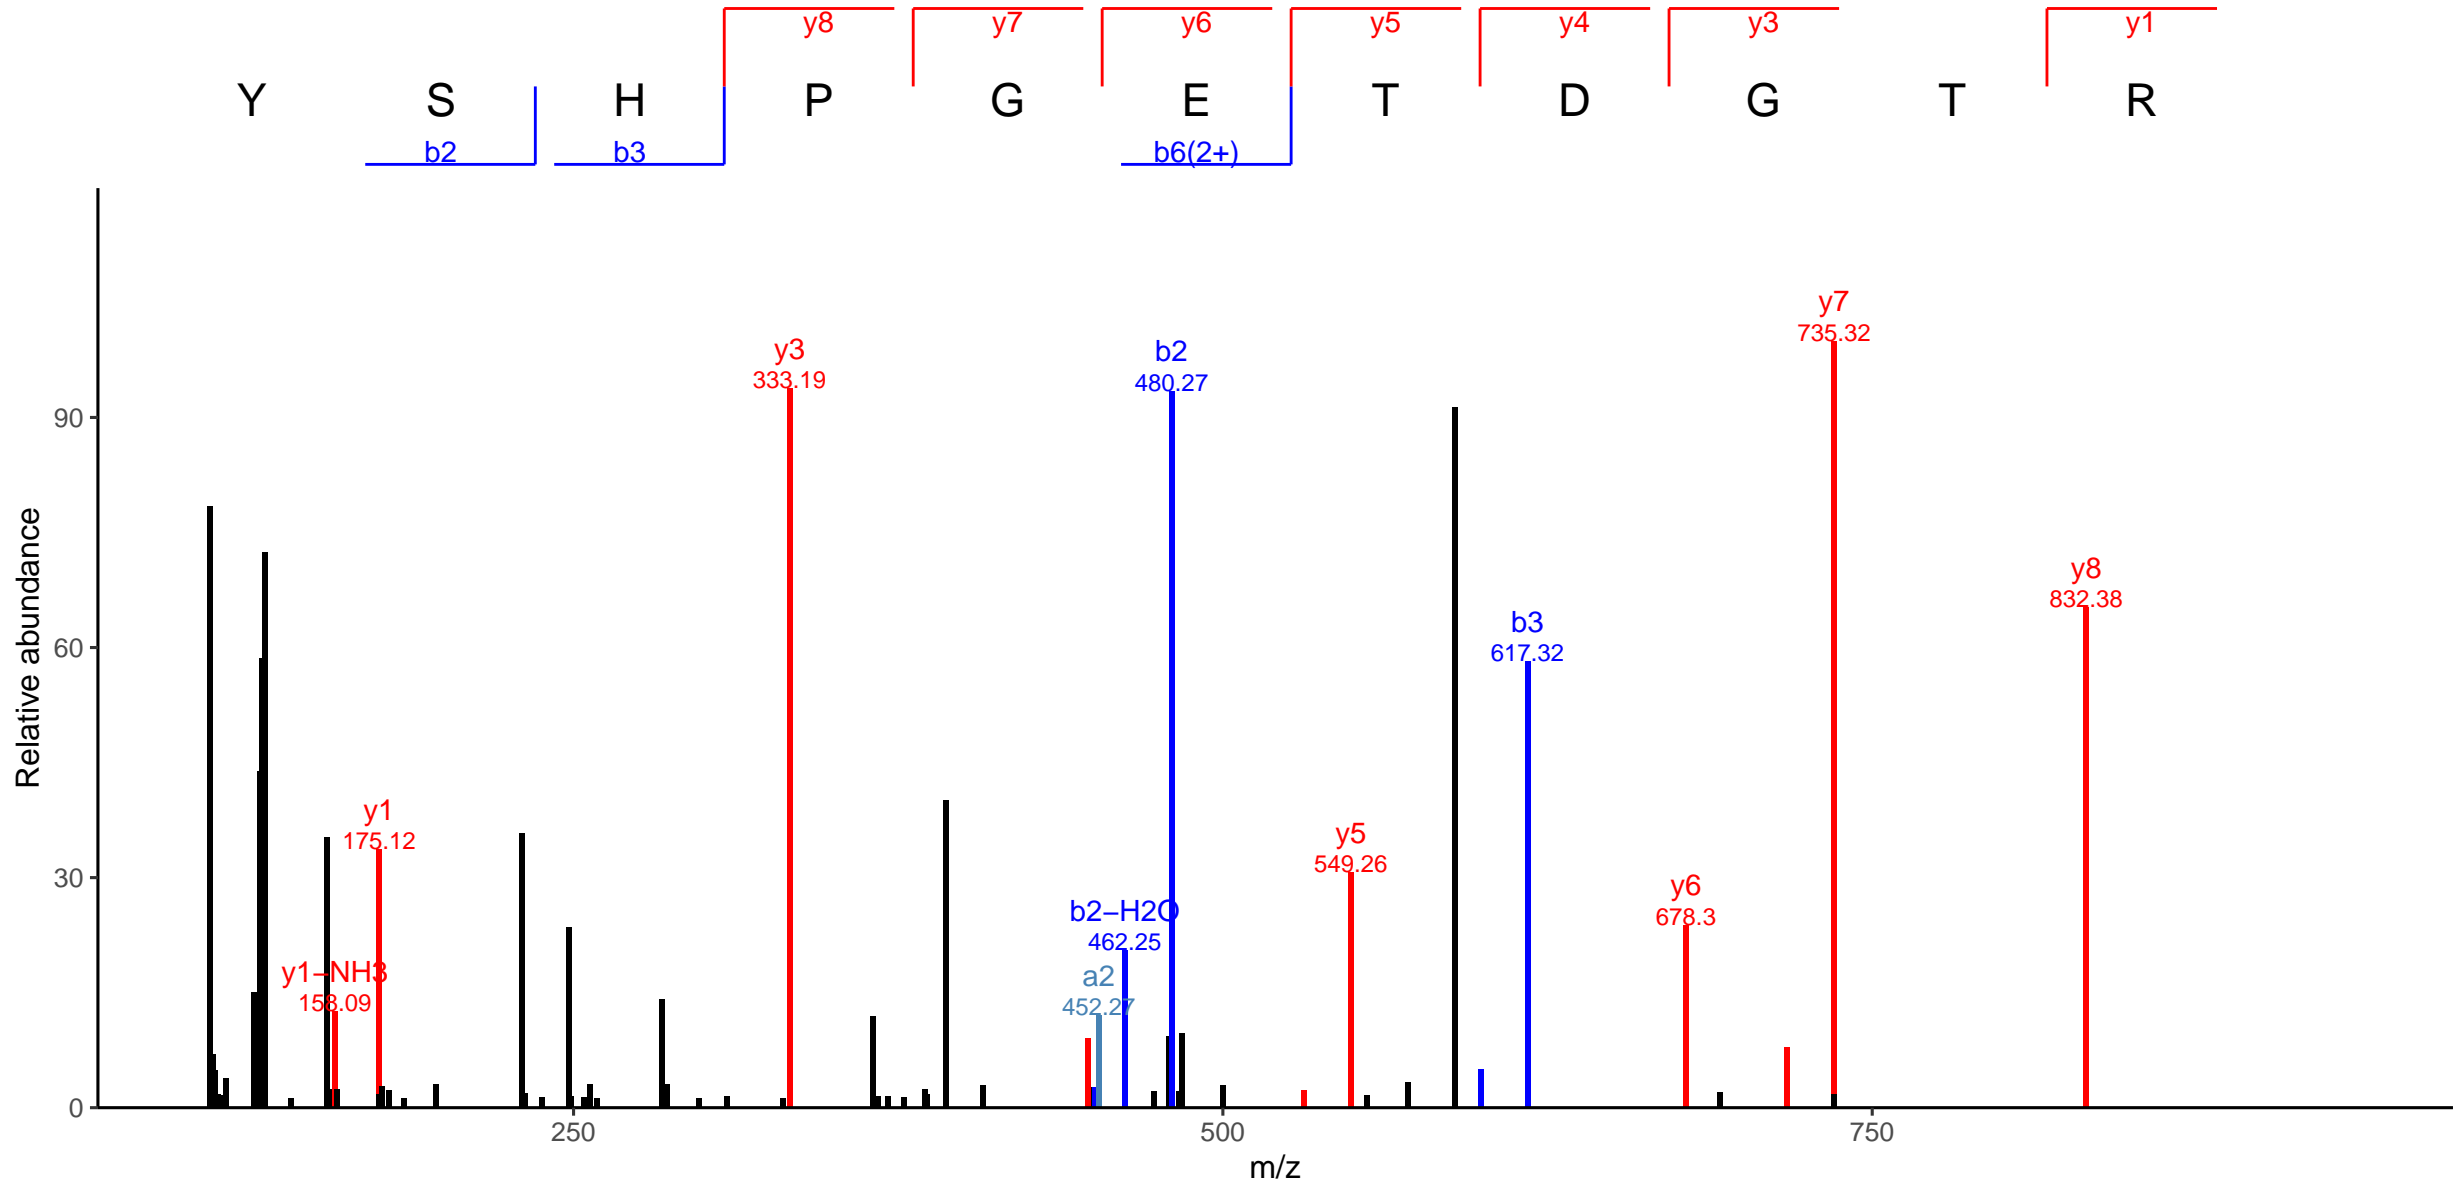



| Raw file | Scan number | Mass analyzer | Score  | m/z     | Proteins |
|----------|-------------|---------------|--------|---------|----------|
| 7610TQ_4 | 2168        | FTMS          | 126.71 | 533.244 | Q9UPN7   |

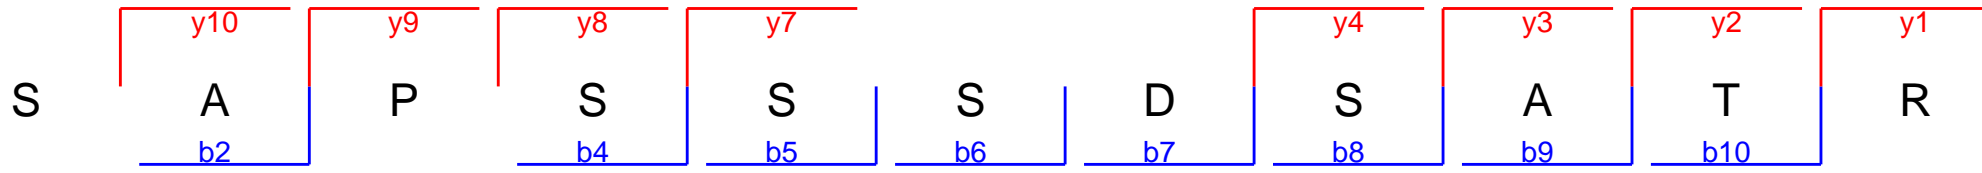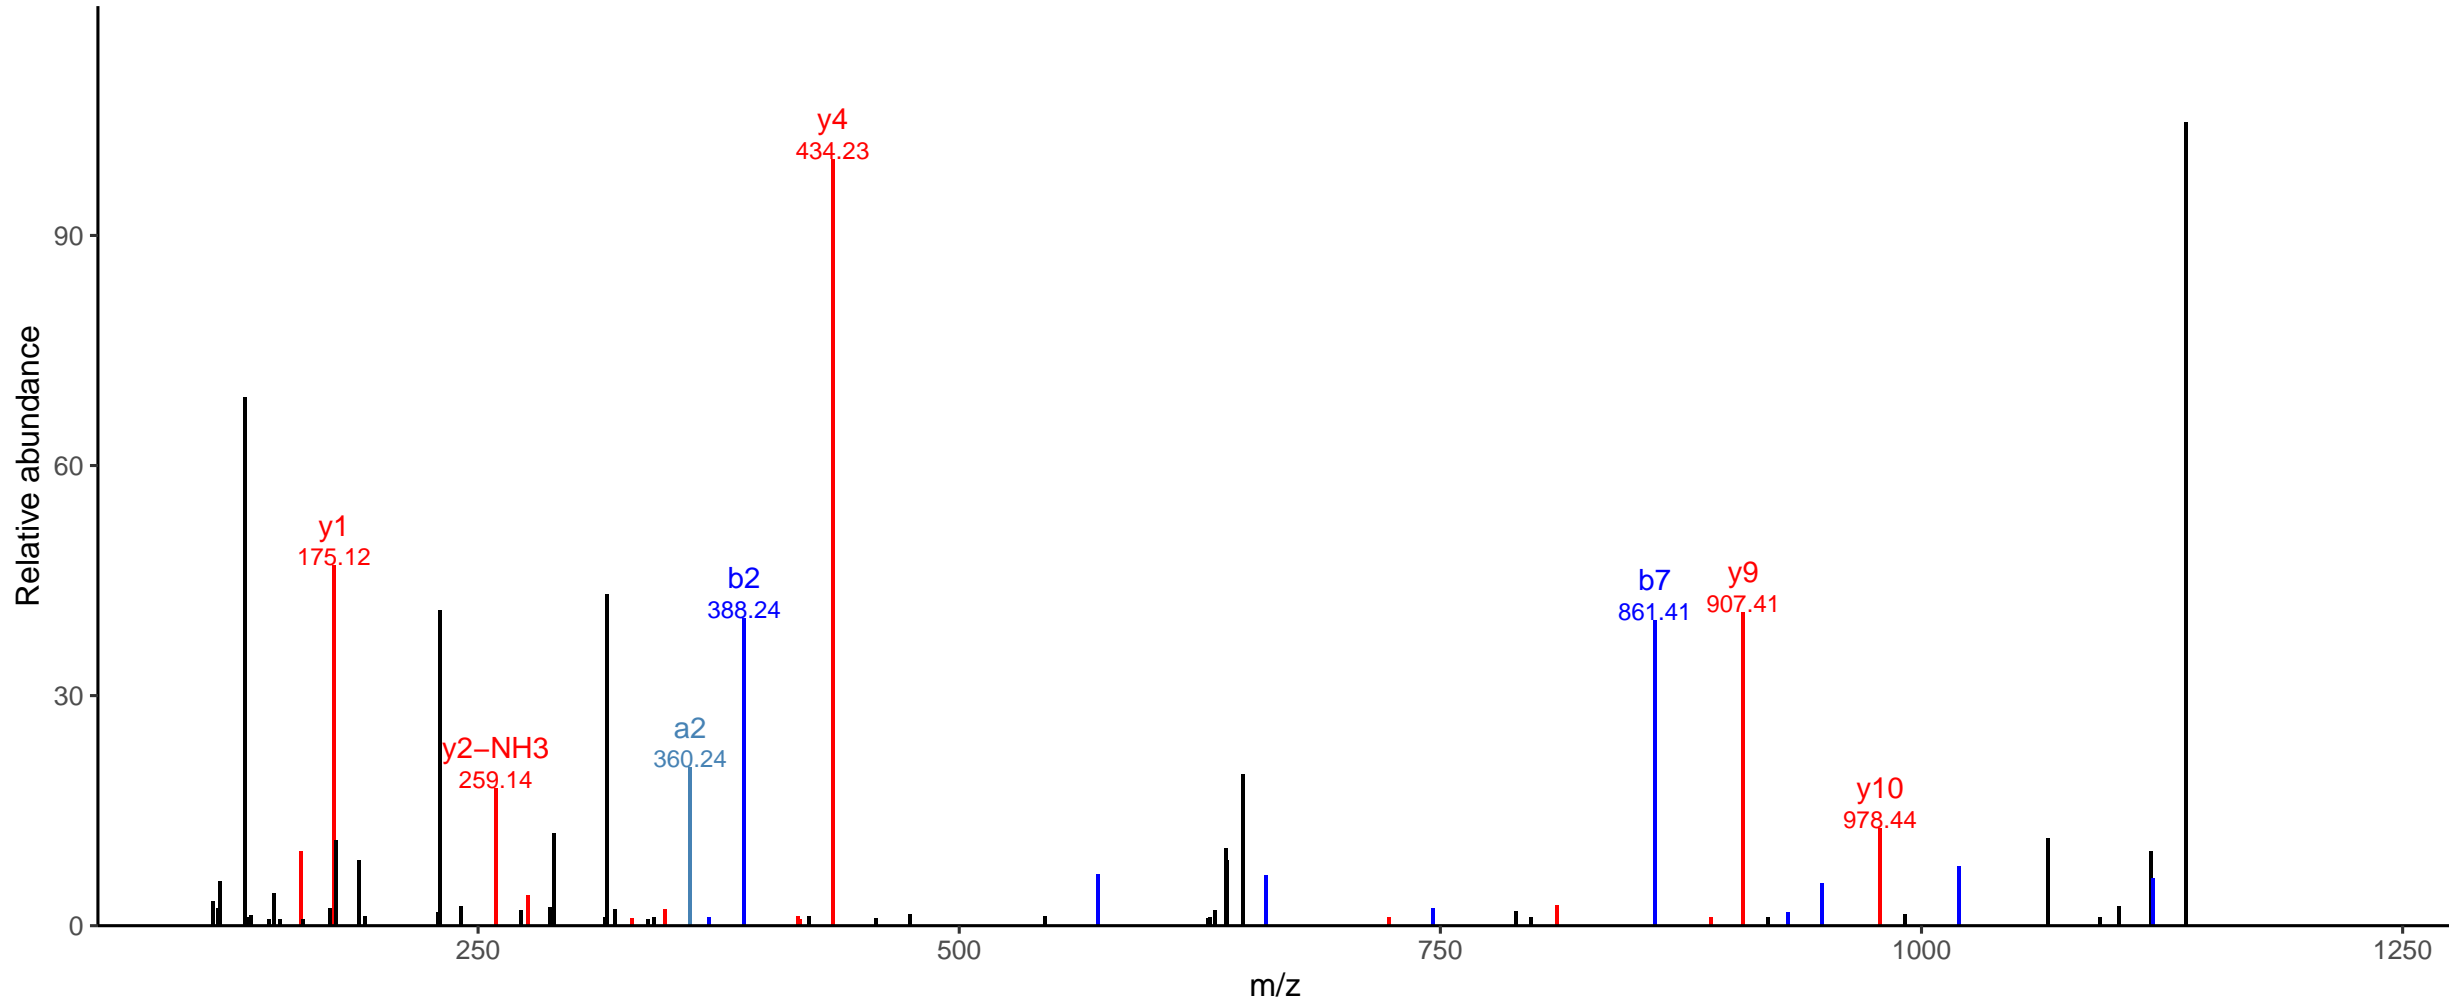

| Raw file | Scan number | Mass analyzer | Score  | m/z      | Proteins |
|----------|-------------|---------------|--------|----------|----------|
| 7610TQ_3 | 13632       | FTMS          | 88.495 | 945.5251 | Q9Y2H2   |

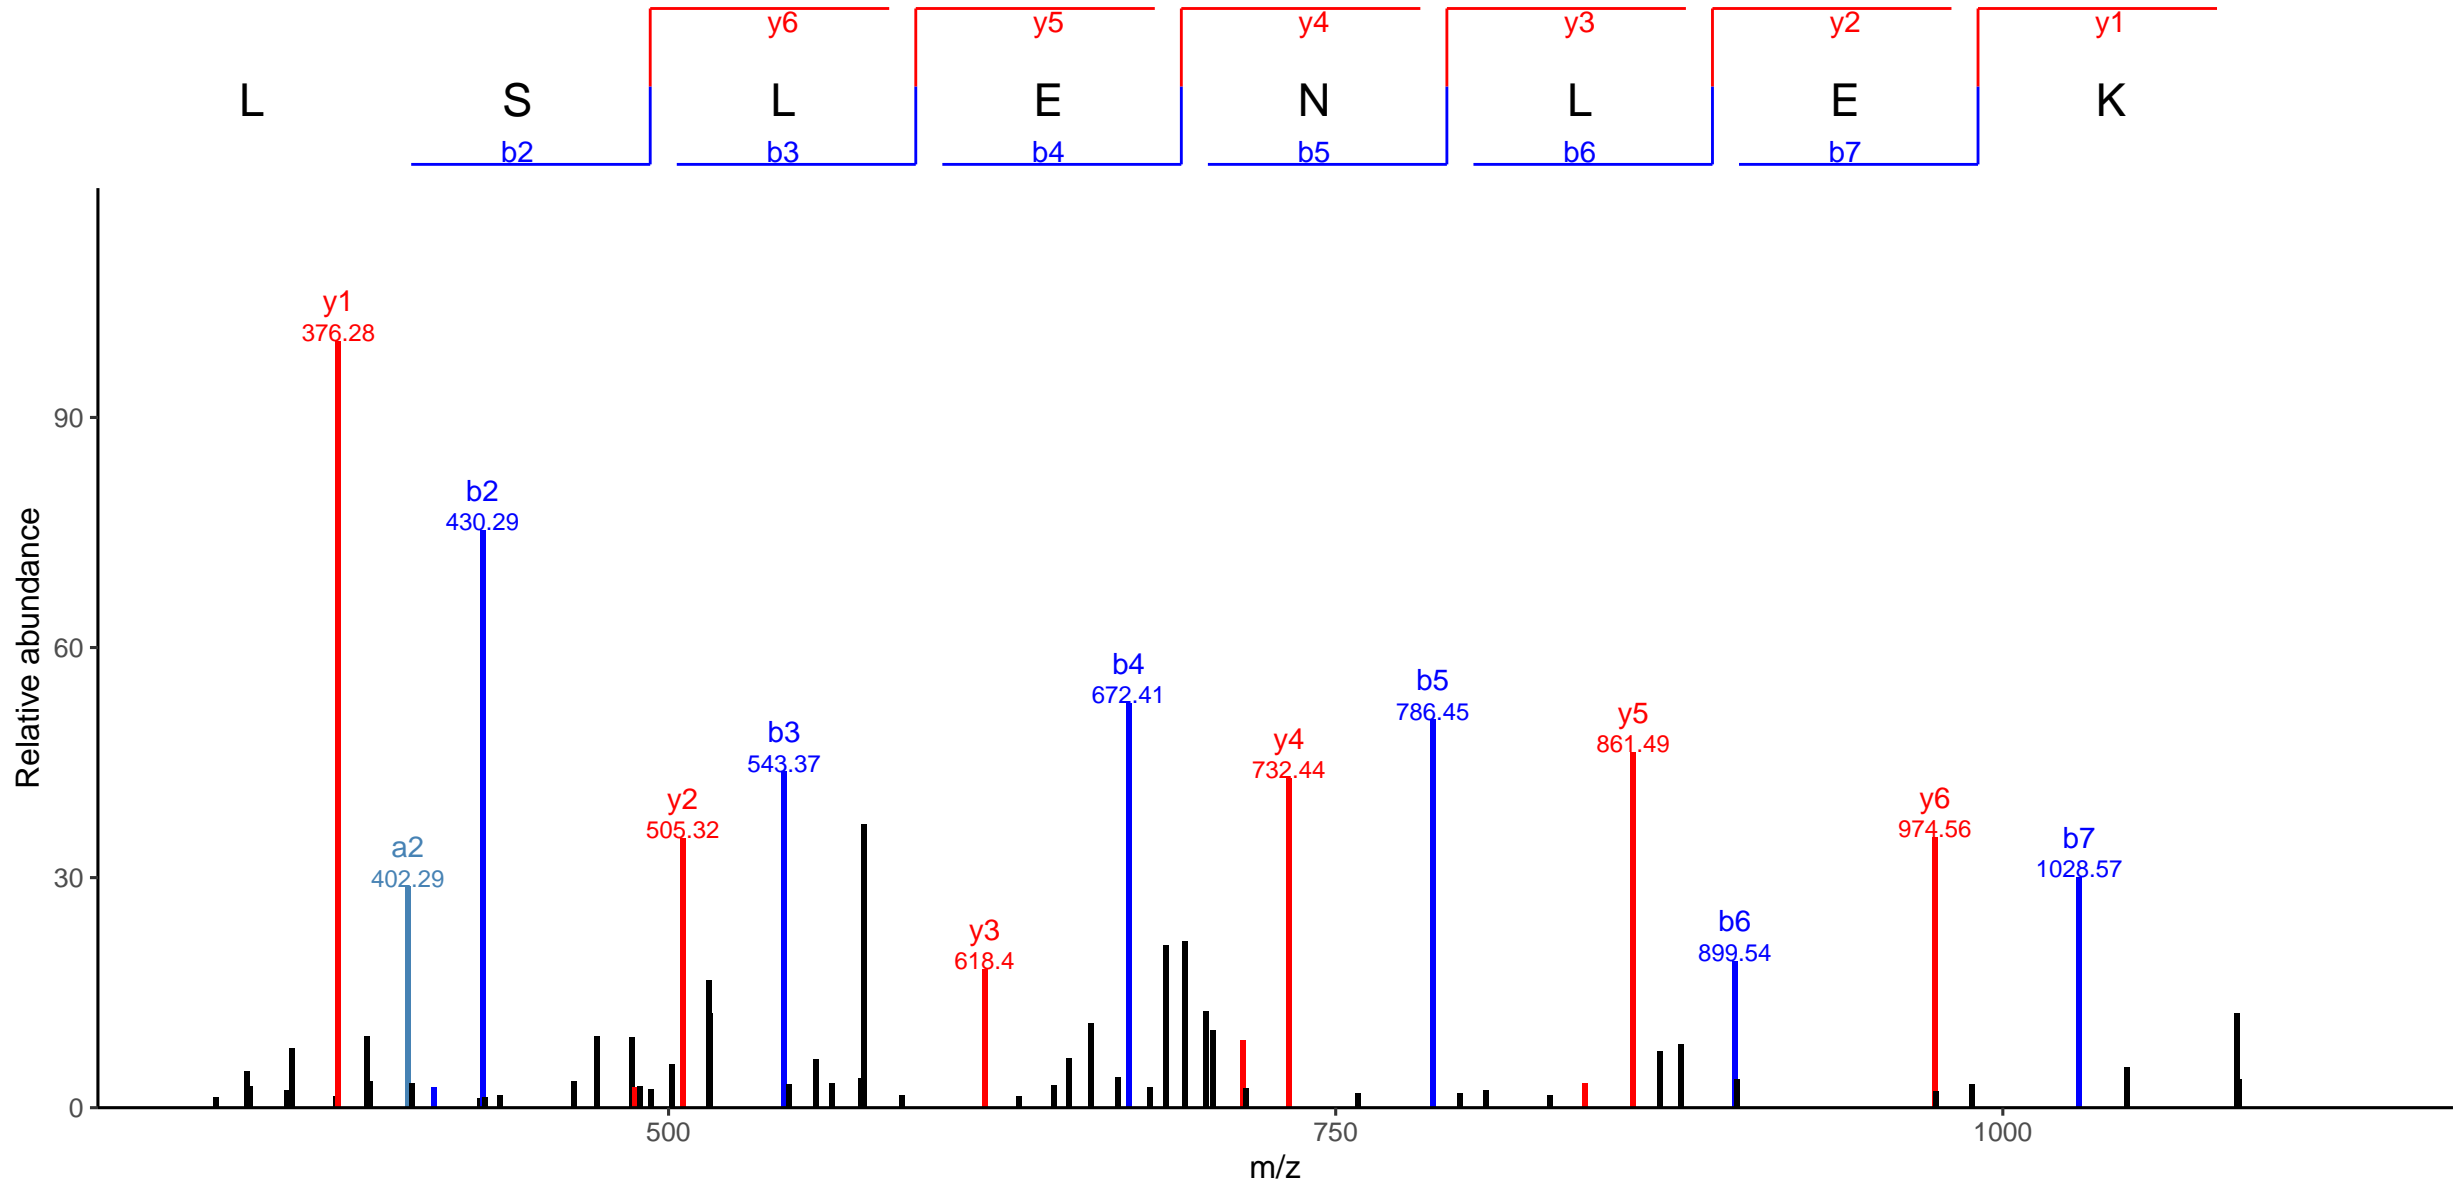

| Raw file  | Scan number | Mass analyzer | Score | m/z      | Proteins |
|-----------|-------------|---------------|-------|----------|----------|
| 7610TQ_18 | 2447        | FTMS          | 141.2 | 592.8102 | Q9Y5J6   |

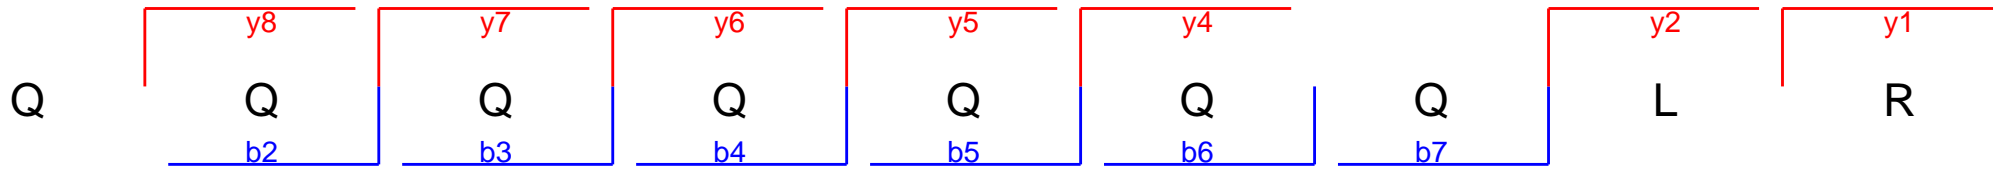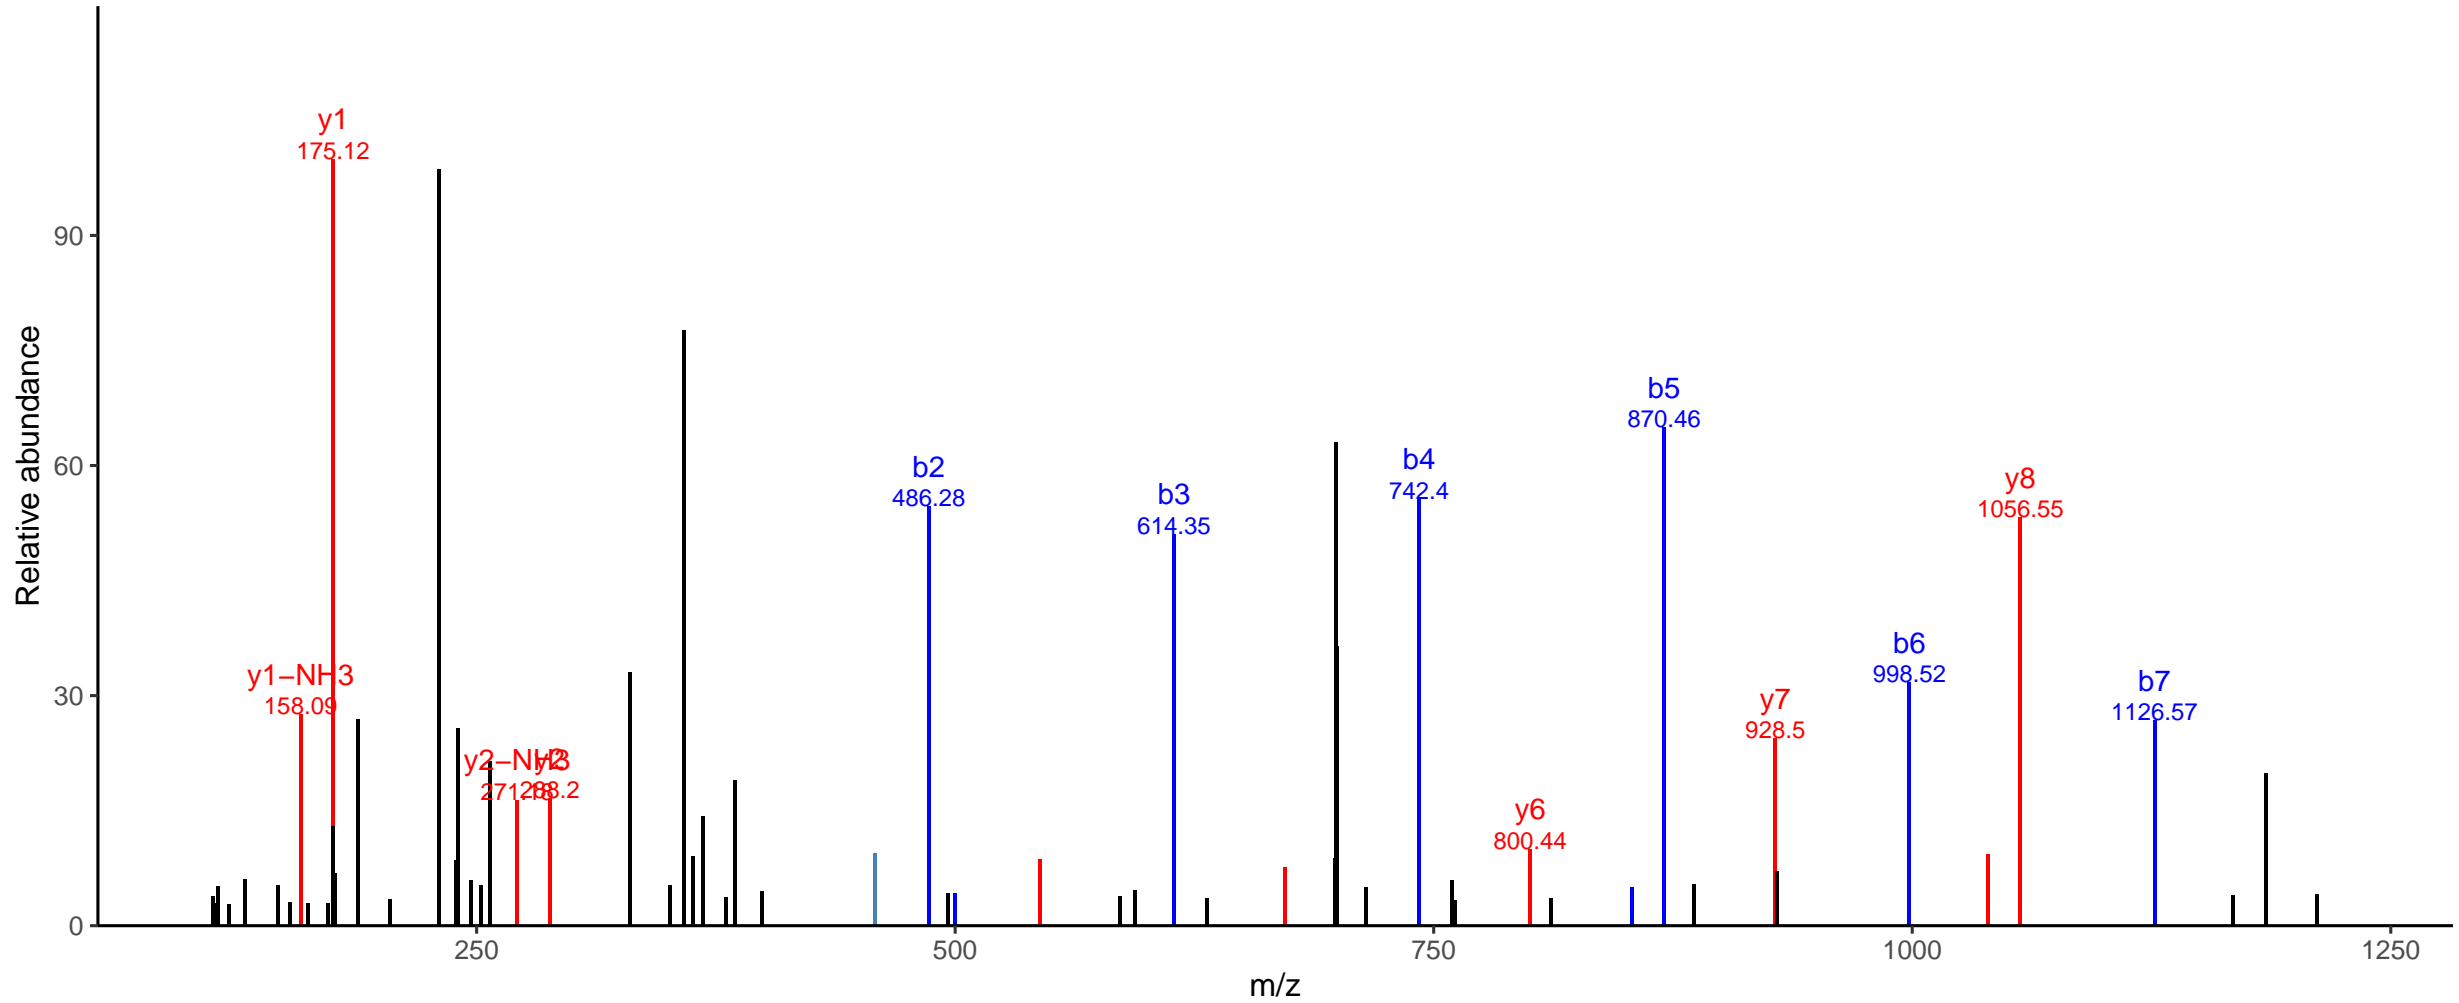

| Raw file | Scan number | Mass analyzer | Score  | m/z      | Proteins |
|----------|-------------|---------------|--------|----------|----------|
| 7610TQ_5 | 13609       | FTMS          | 91.069 | 389.1857 | Q9Y5X1   |

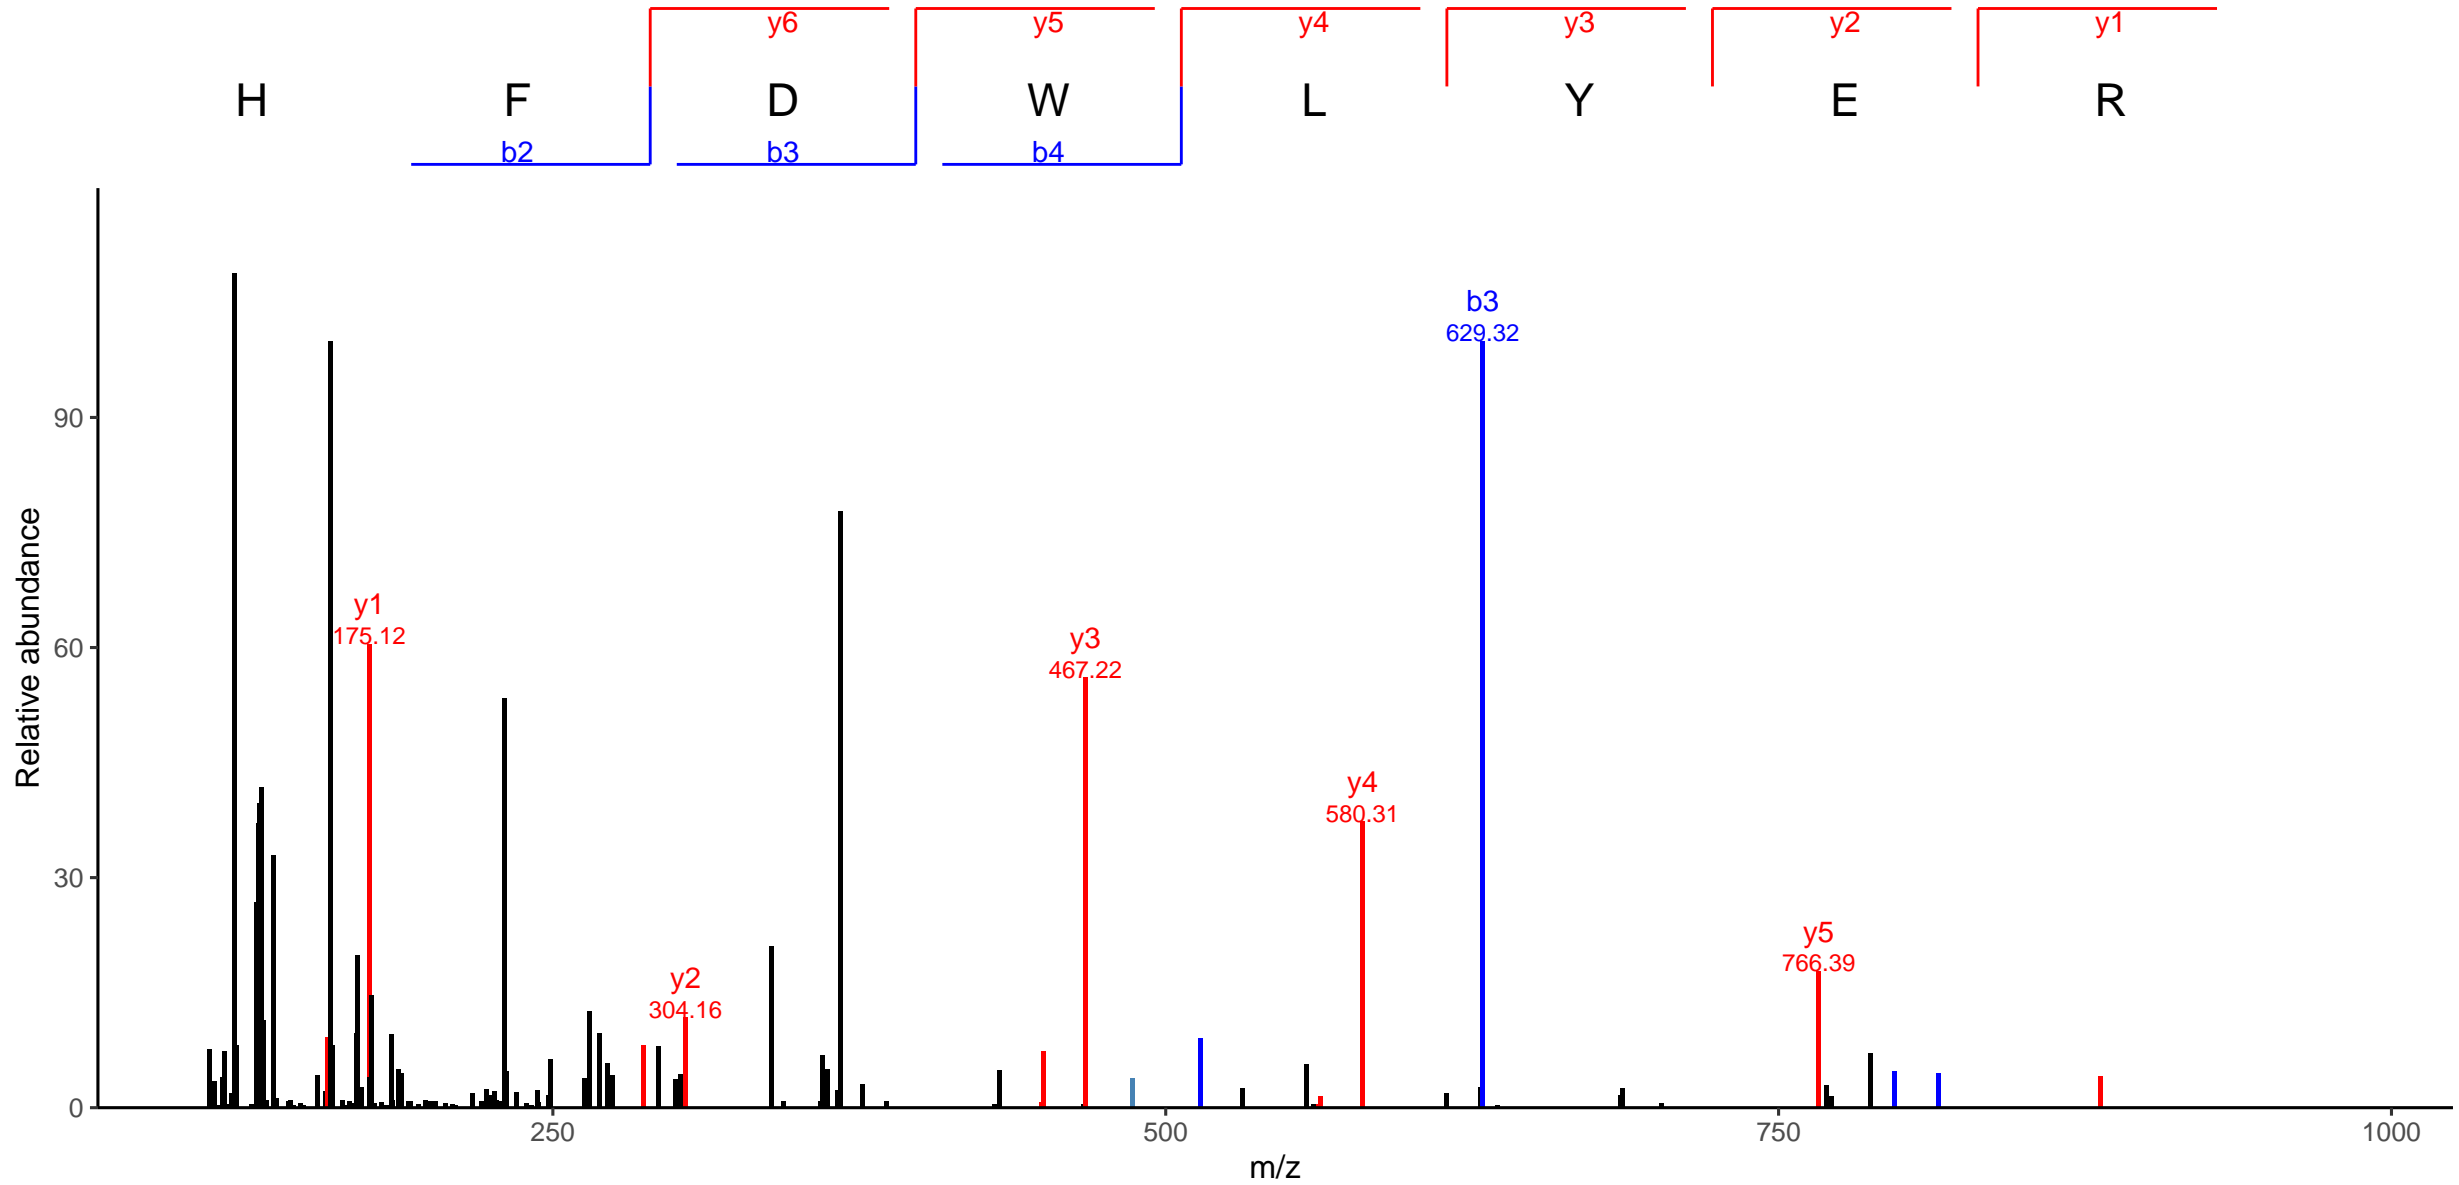

| Raw file  | Scan number | Mass analyzer | Score  | m/z      | Proteins      |
|-----------|-------------|---------------|--------|----------|---------------|
| 7610TQ_11 | 12154       | FTMS          | 93.649 | 1049.457 | P09651;Q32P51 |

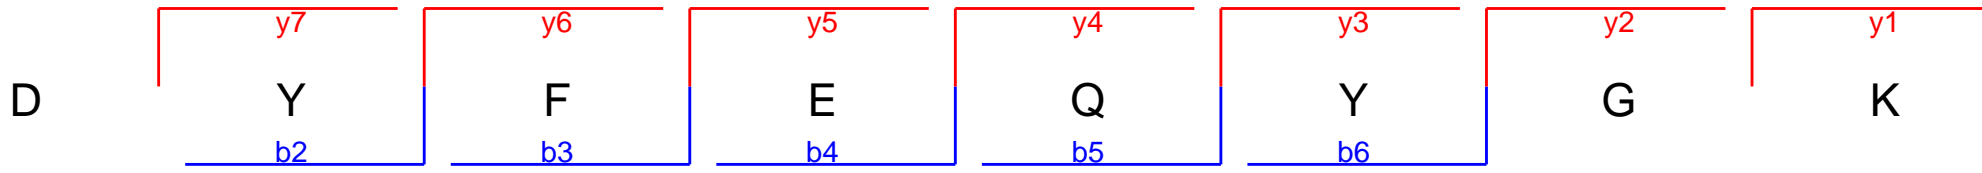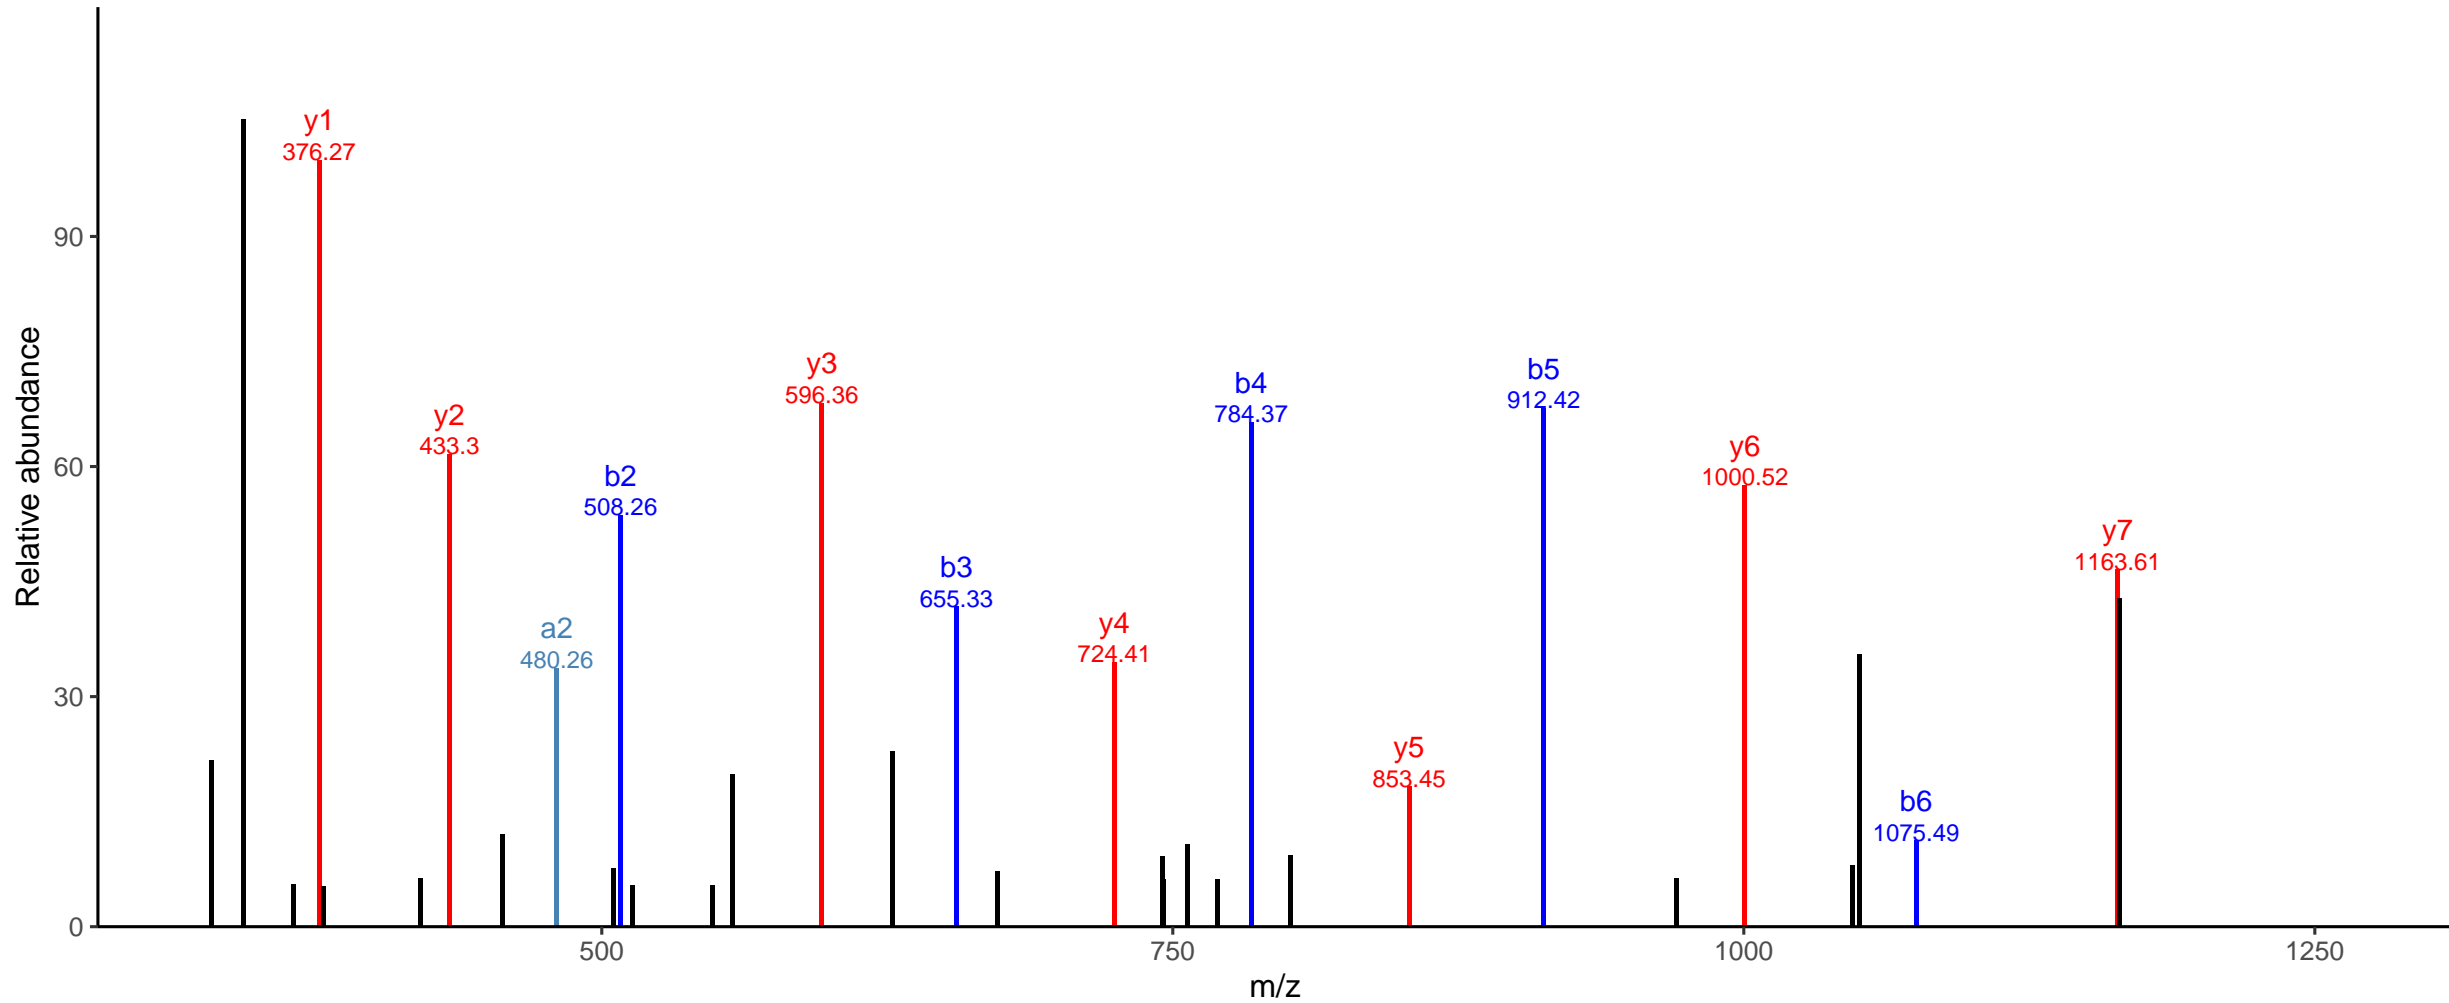

| Raw file  | Scan number | Mass analyzer | Score | m/z     | Proteins |
|-----------|-------------|---------------|-------|---------|----------|
| 7610TQ_13 | 16811       | FTMS          | 81.92 | 1332.72 | Q86UY6   |

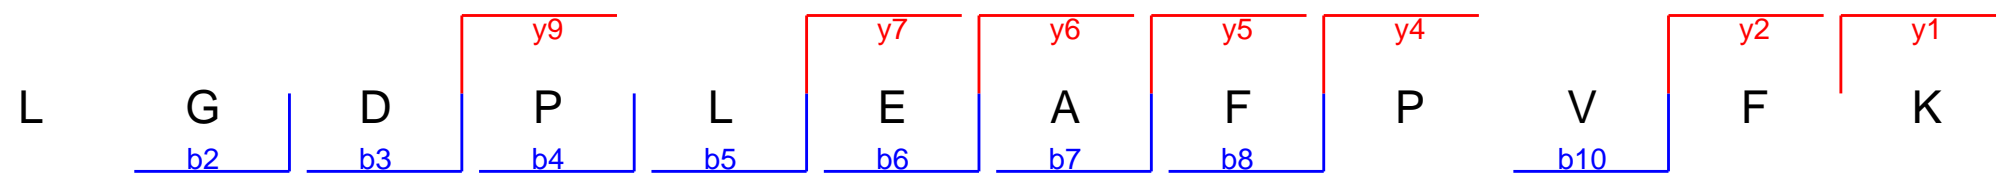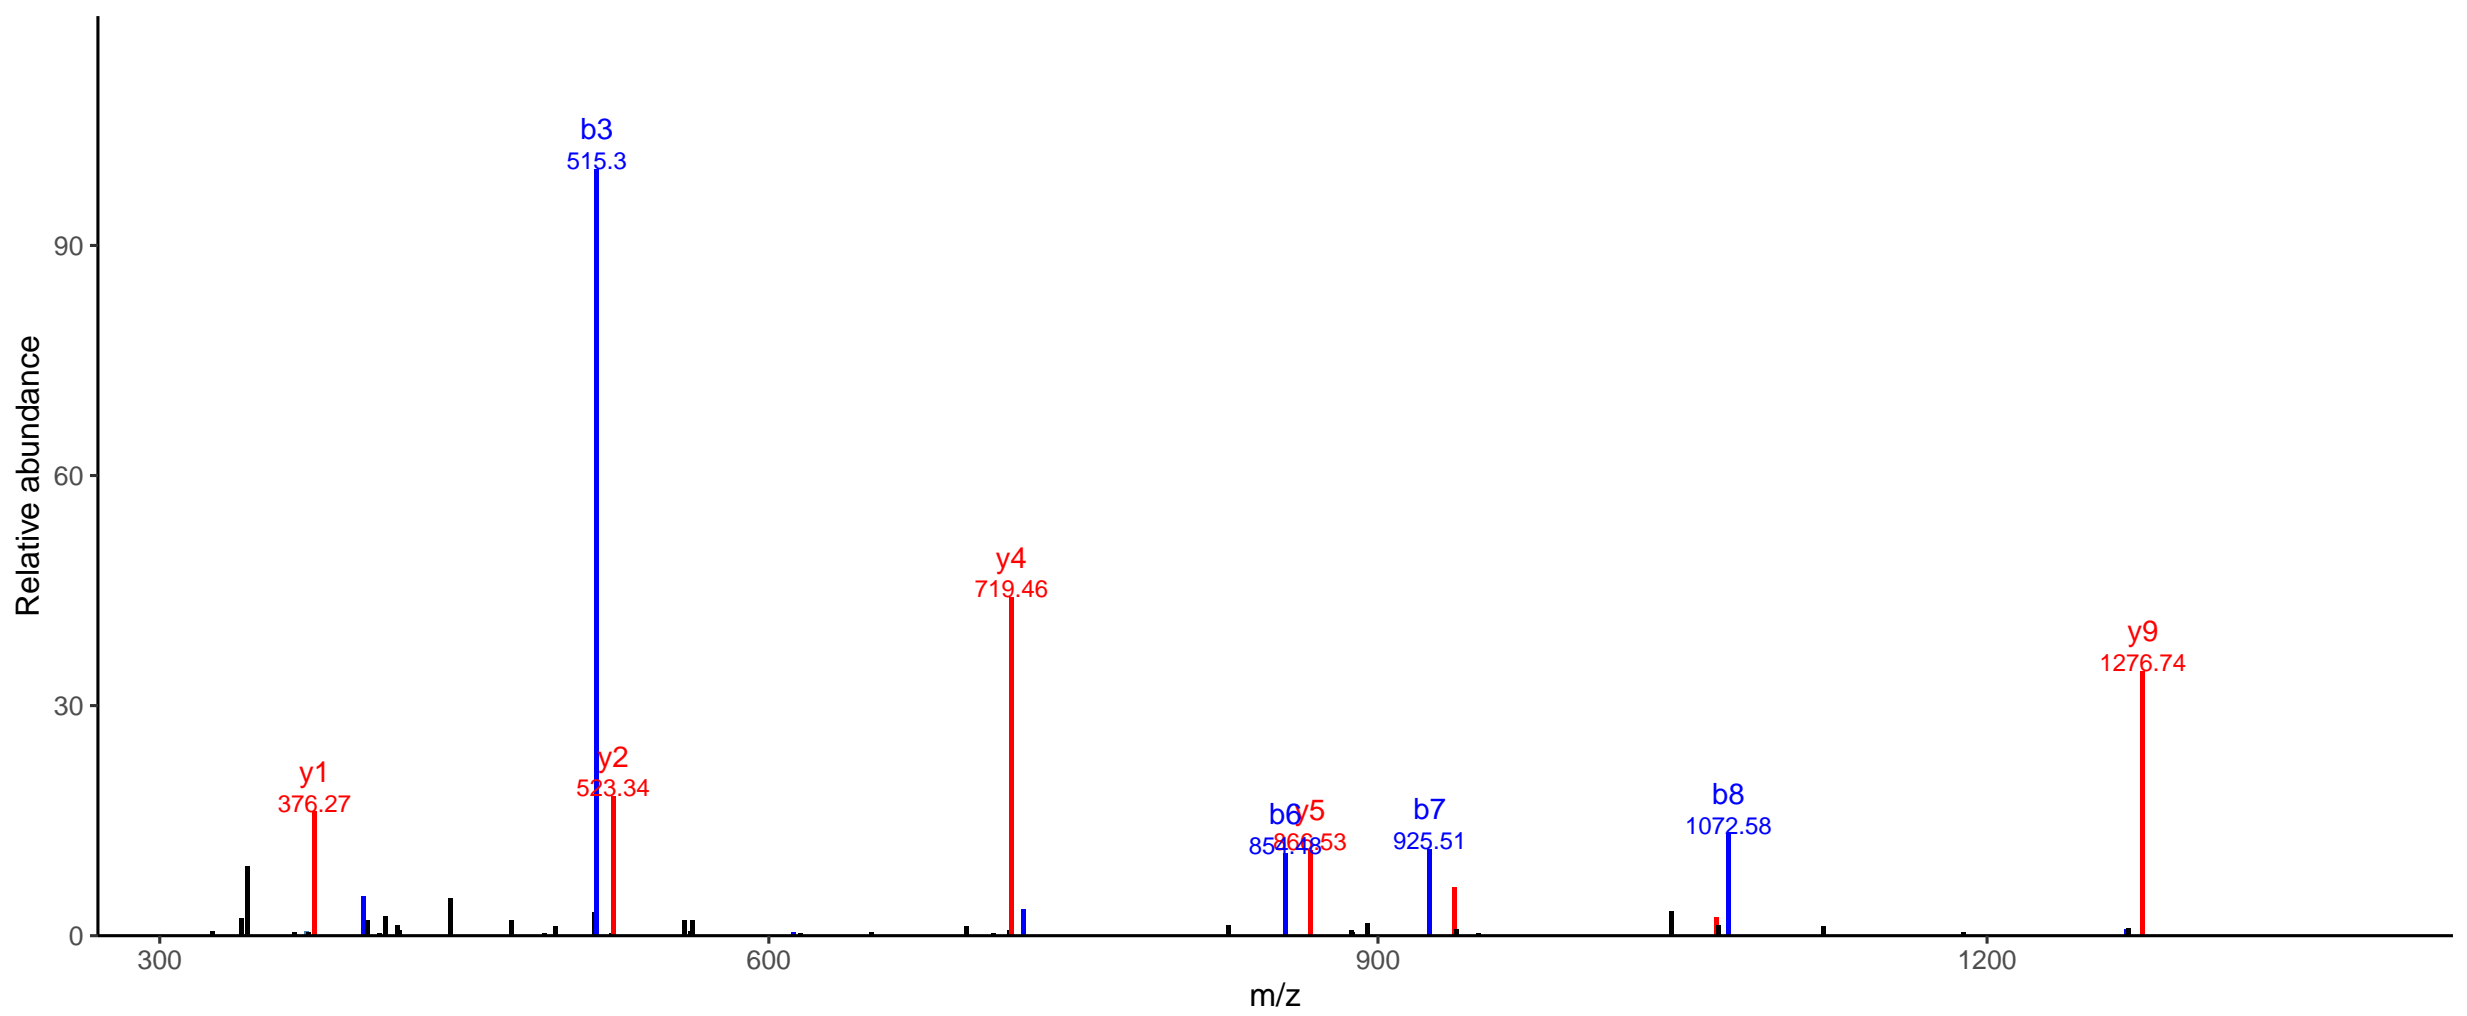

| Raw file  | Scan number | Mass analyzer | Score  | m/z      | Proteins |
|-----------|-------------|---------------|--------|----------|----------|
| 7610TQ_14 | 5542        | FTMS          | 120.06 | 1006.462 | Q96AT9   |

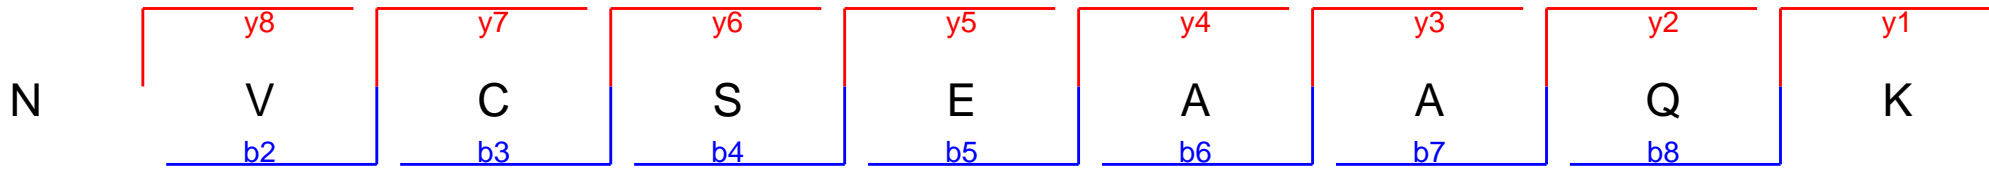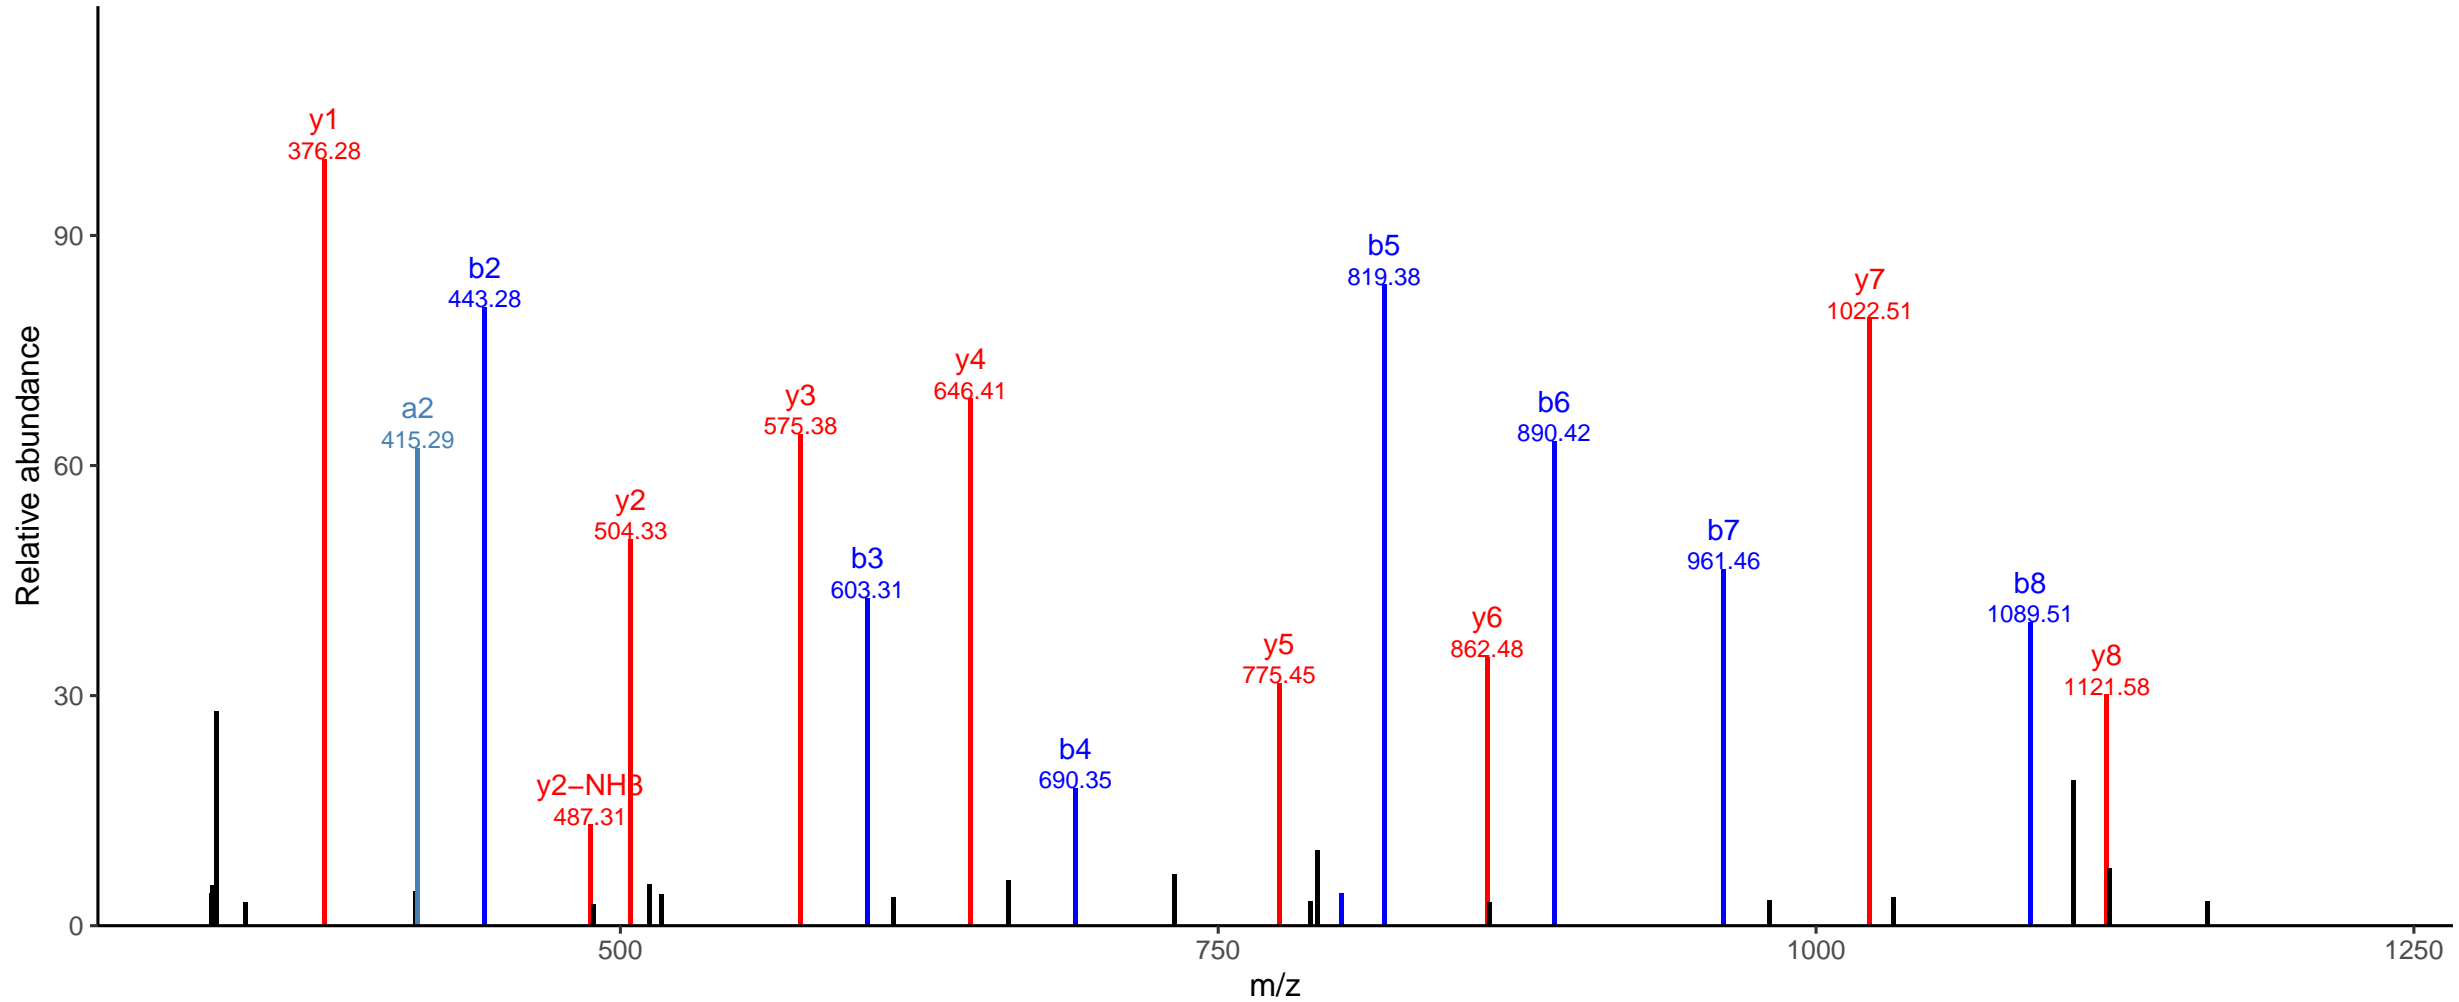

| Raw file  | Scan number | Mass analyzer | Score | m/z     | Proteins |
|-----------|-------------|---------------|-------|---------|----------|
| 7610TQ_10 | 14978       | FTMS          | 114.7 | 759.888 | Q96B97   |

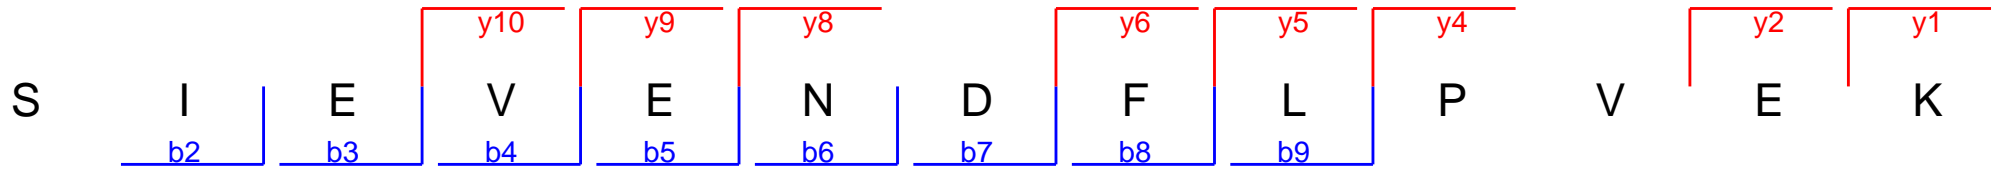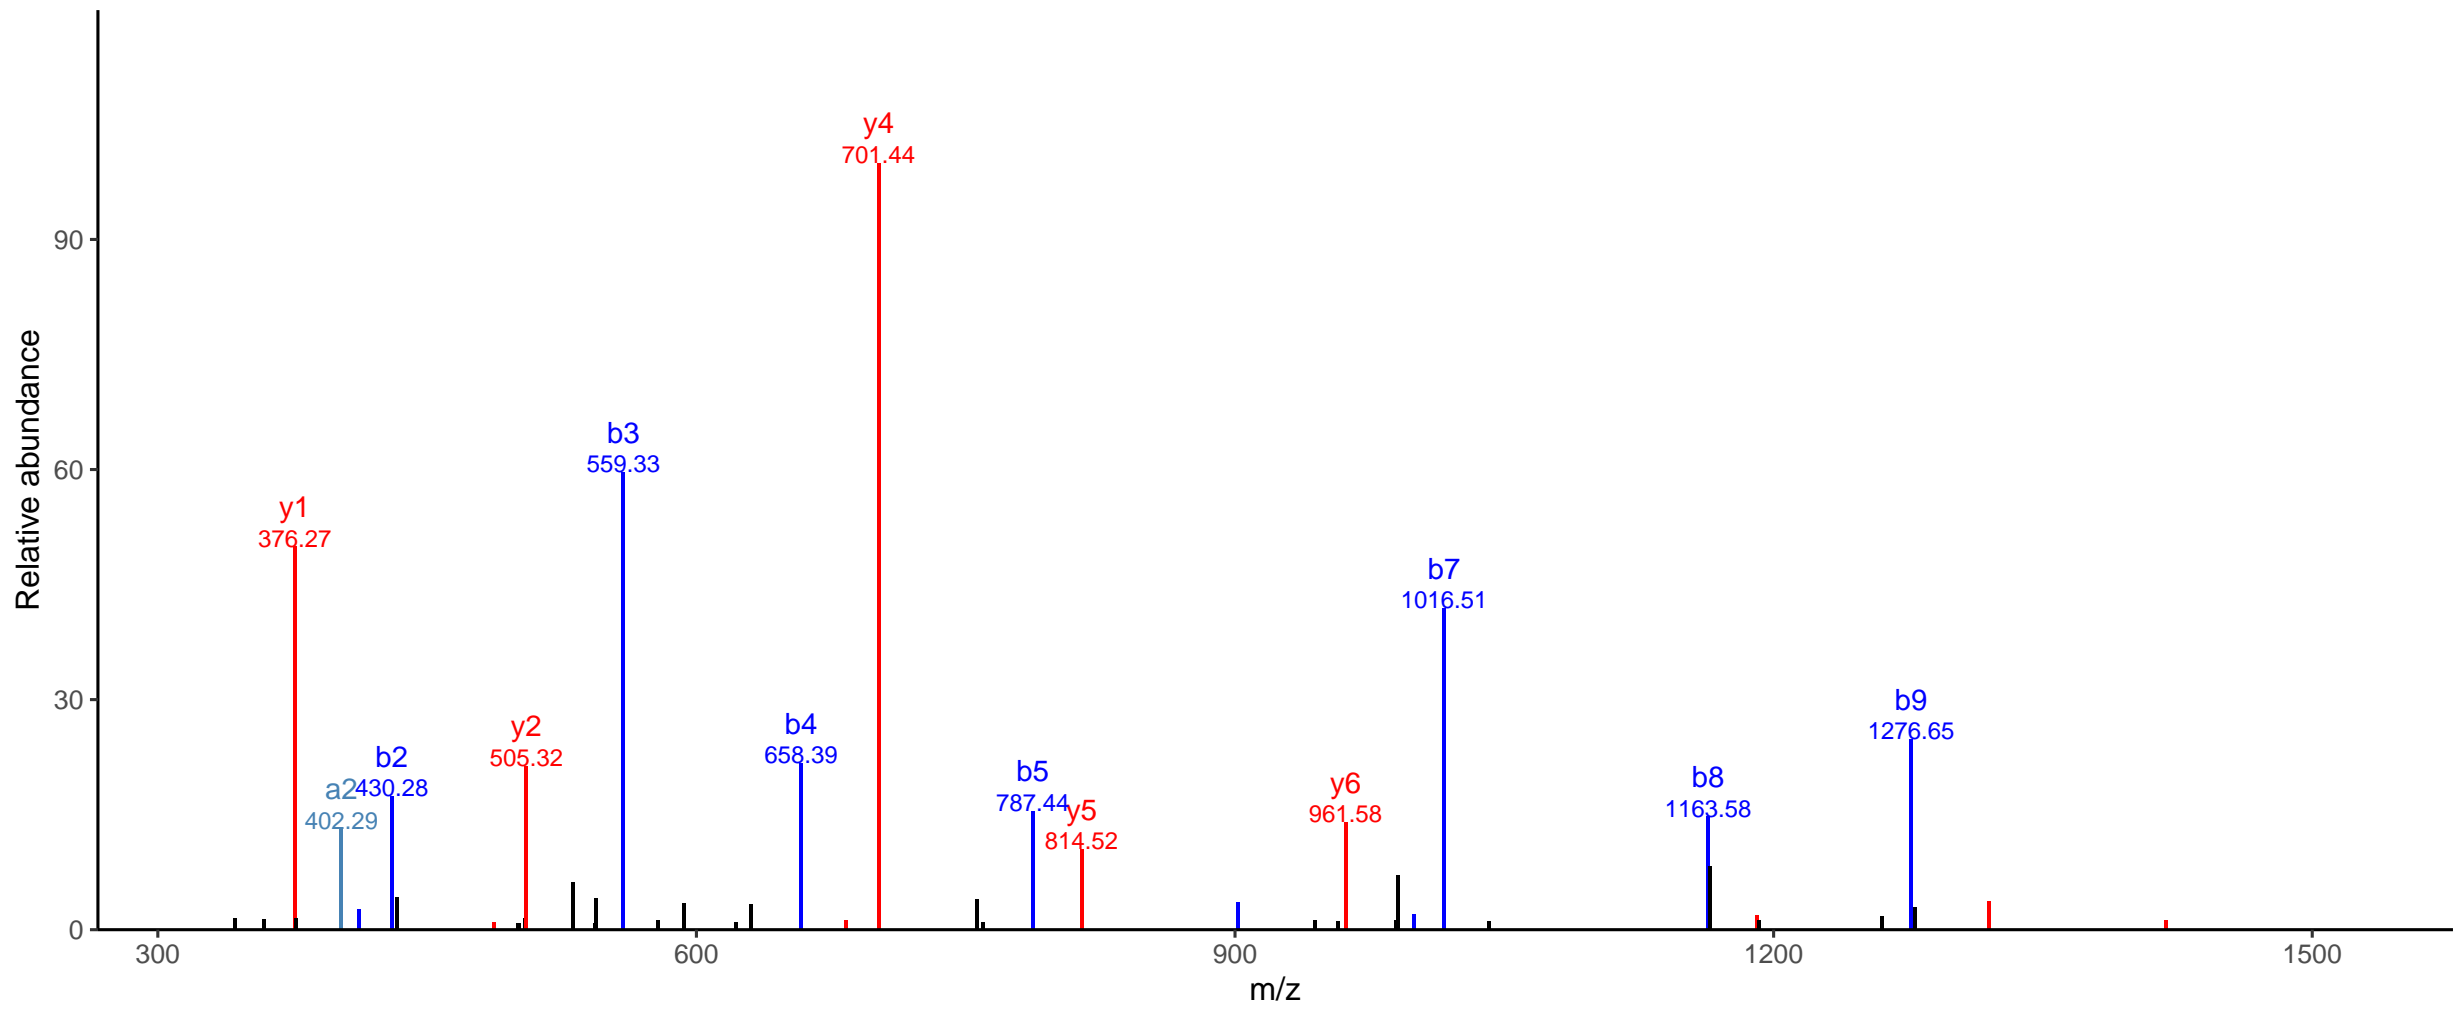



| Raw file  | Scan number | Mass analyzer | Score  | m/z      | Proteins |
|-----------|-------------|---------------|--------|----------|----------|
| 7610TQ_14 | 7203        | FTMS          | 71.614 | 885.5152 | Q02487   |

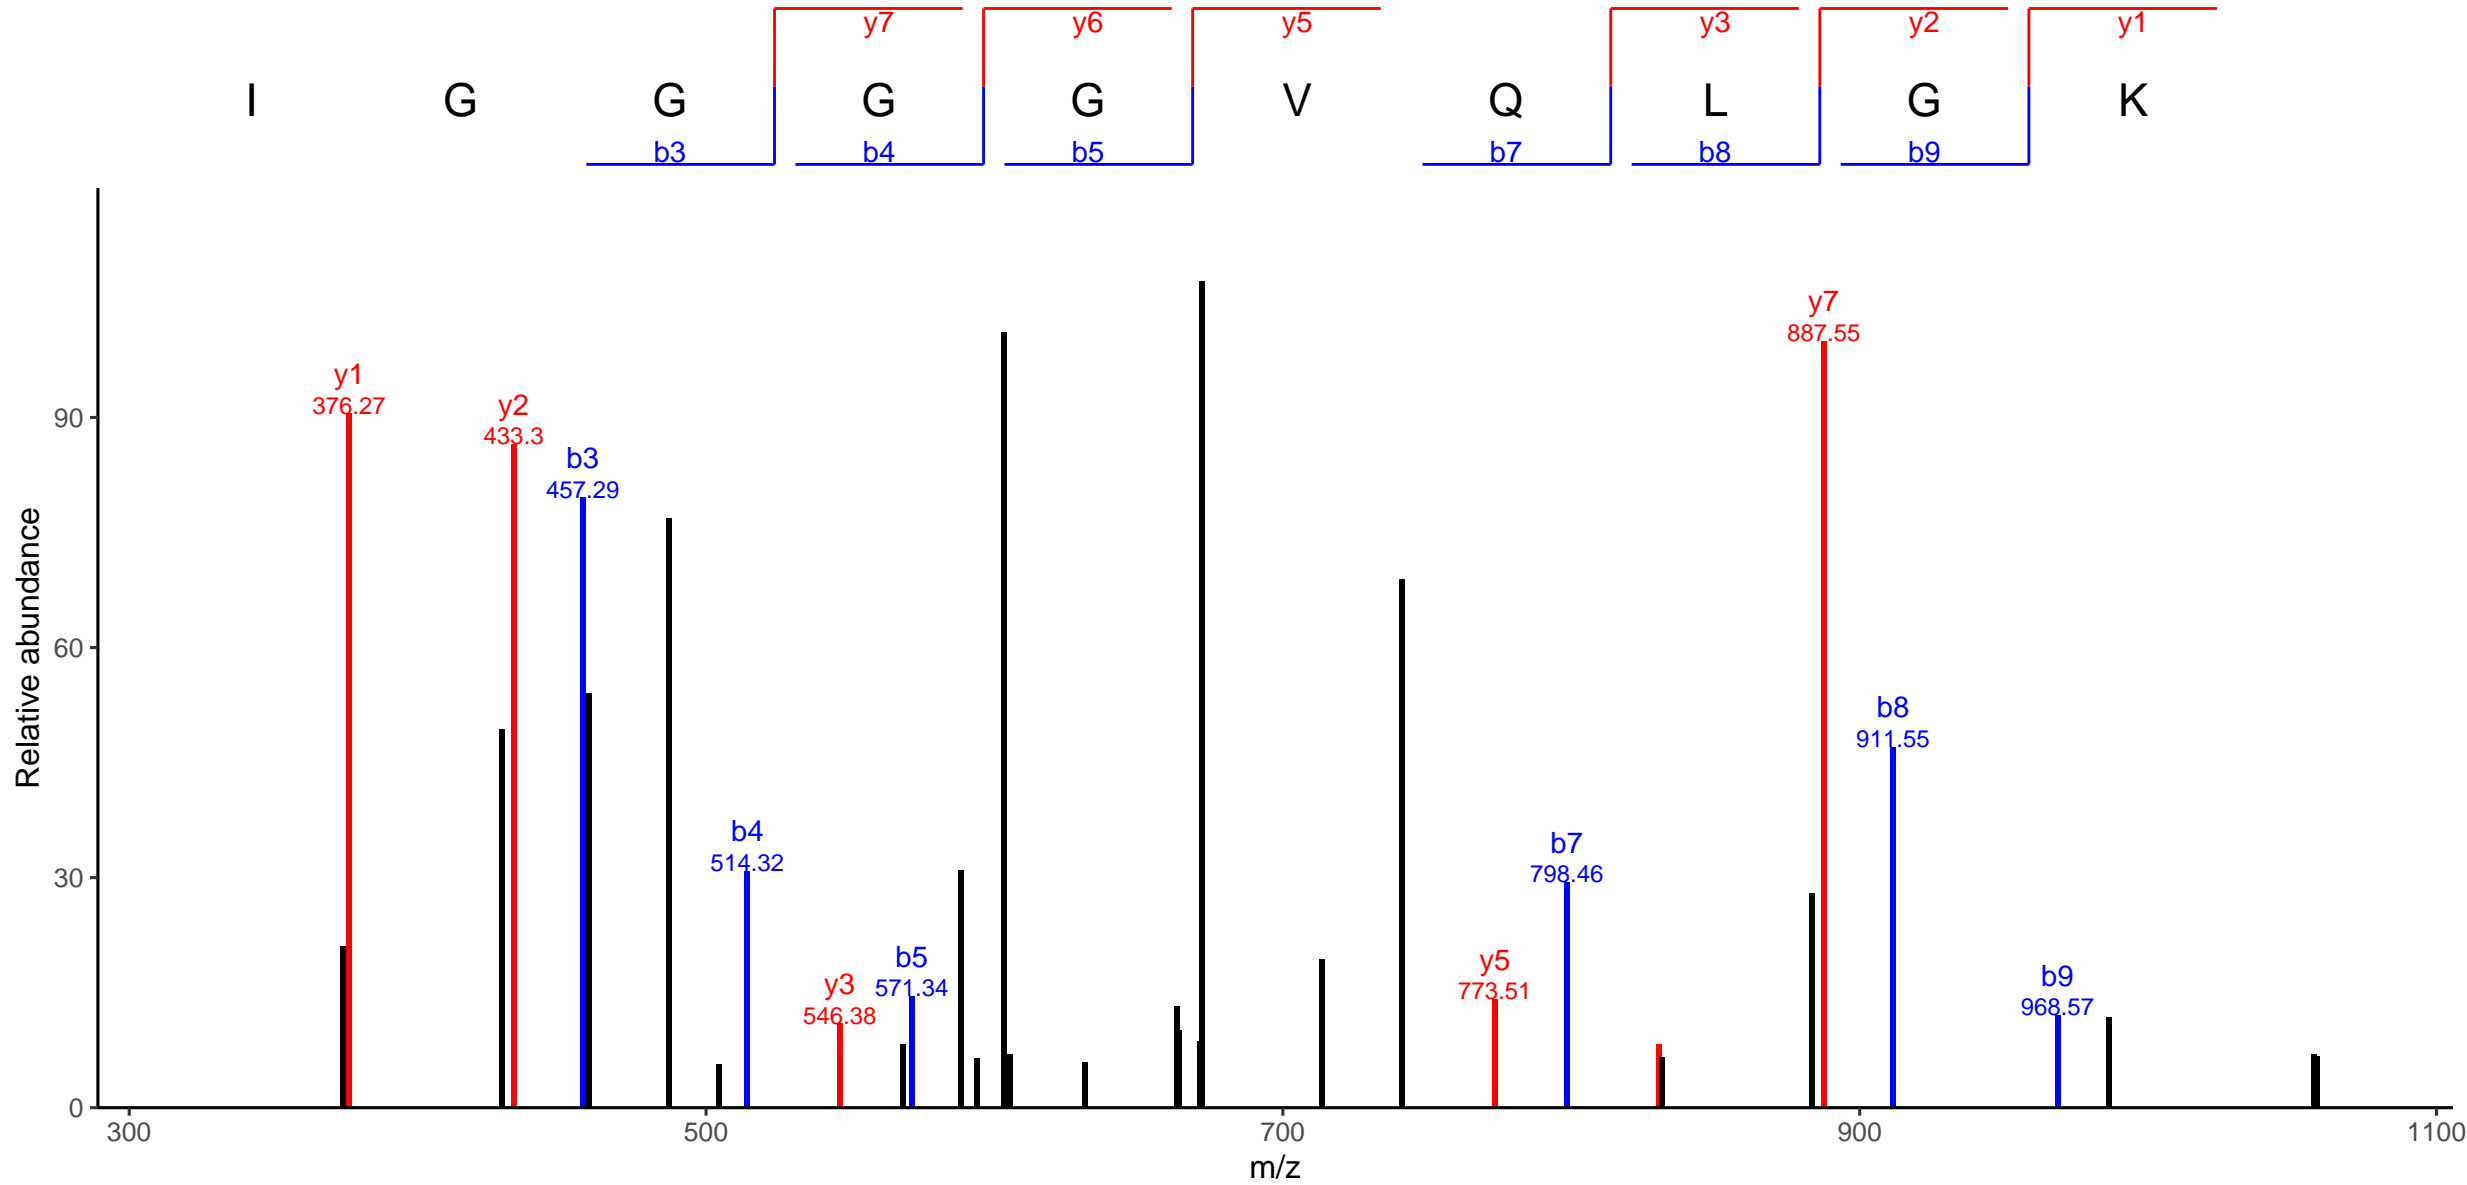

| Raw file | Scan number | Mass analyzer | Score  | m/z      | Proteins             |
|----------|-------------|---------------|--------|----------|----------------------|
| 7610TQ_8 | 4655        | FTMS          | 153.81 | 737.3356 | P09488;P46439;Q03013 |

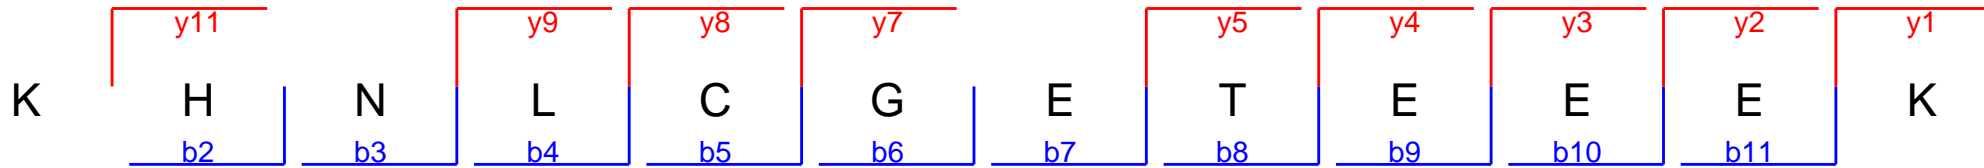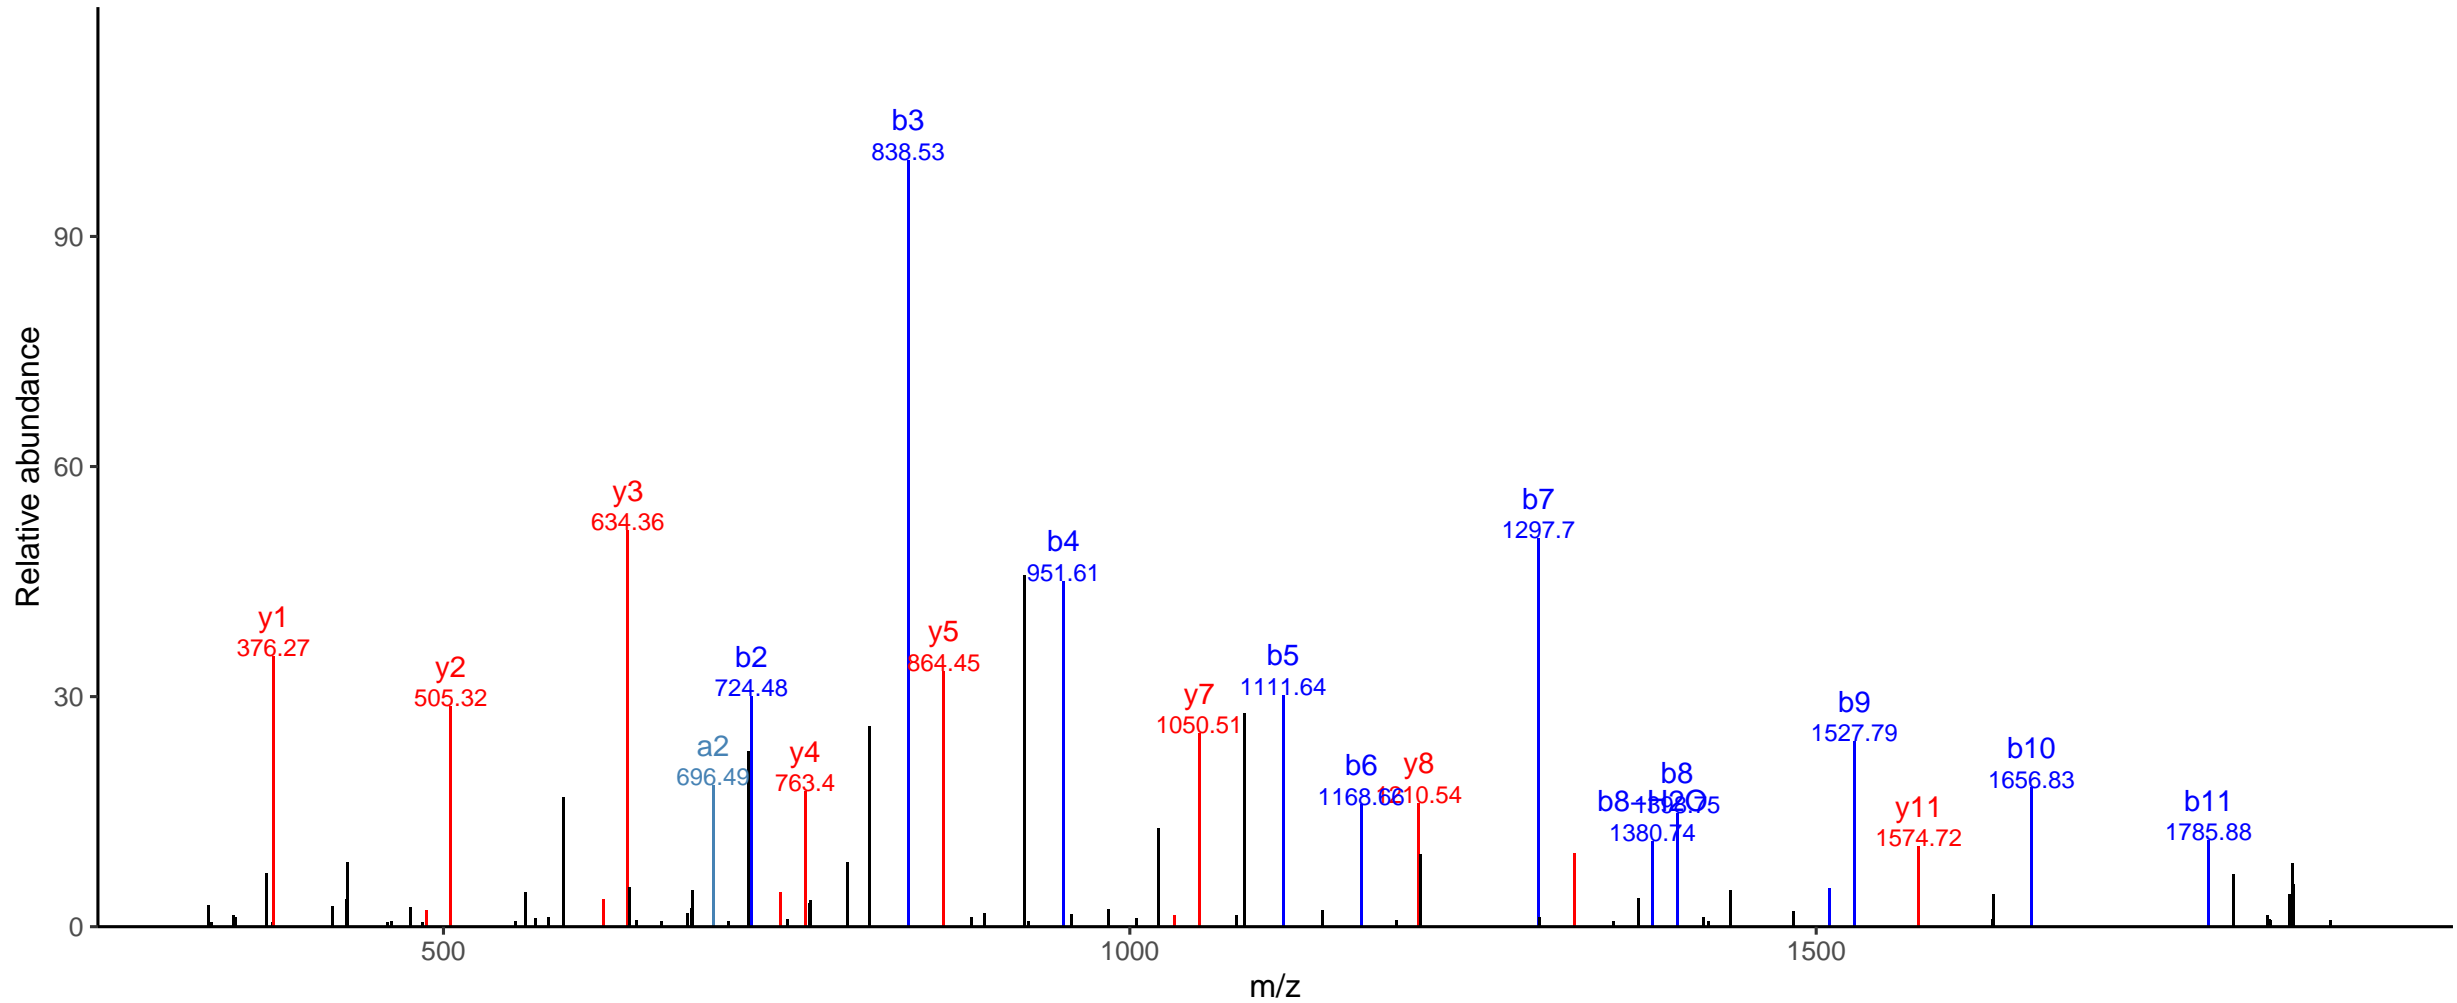

| Raw file  | Scan number | Mass analyzer | Score  | m/z      | Proteins |
|-----------|-------------|---------------|--------|----------|----------|
| 7610TQ_10 | 7717        | FTMS          | 88.075 | 1375.645 | Q05086   |

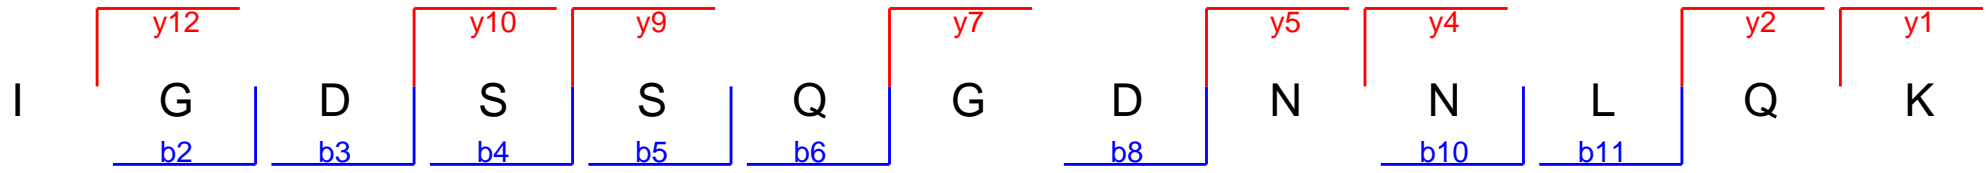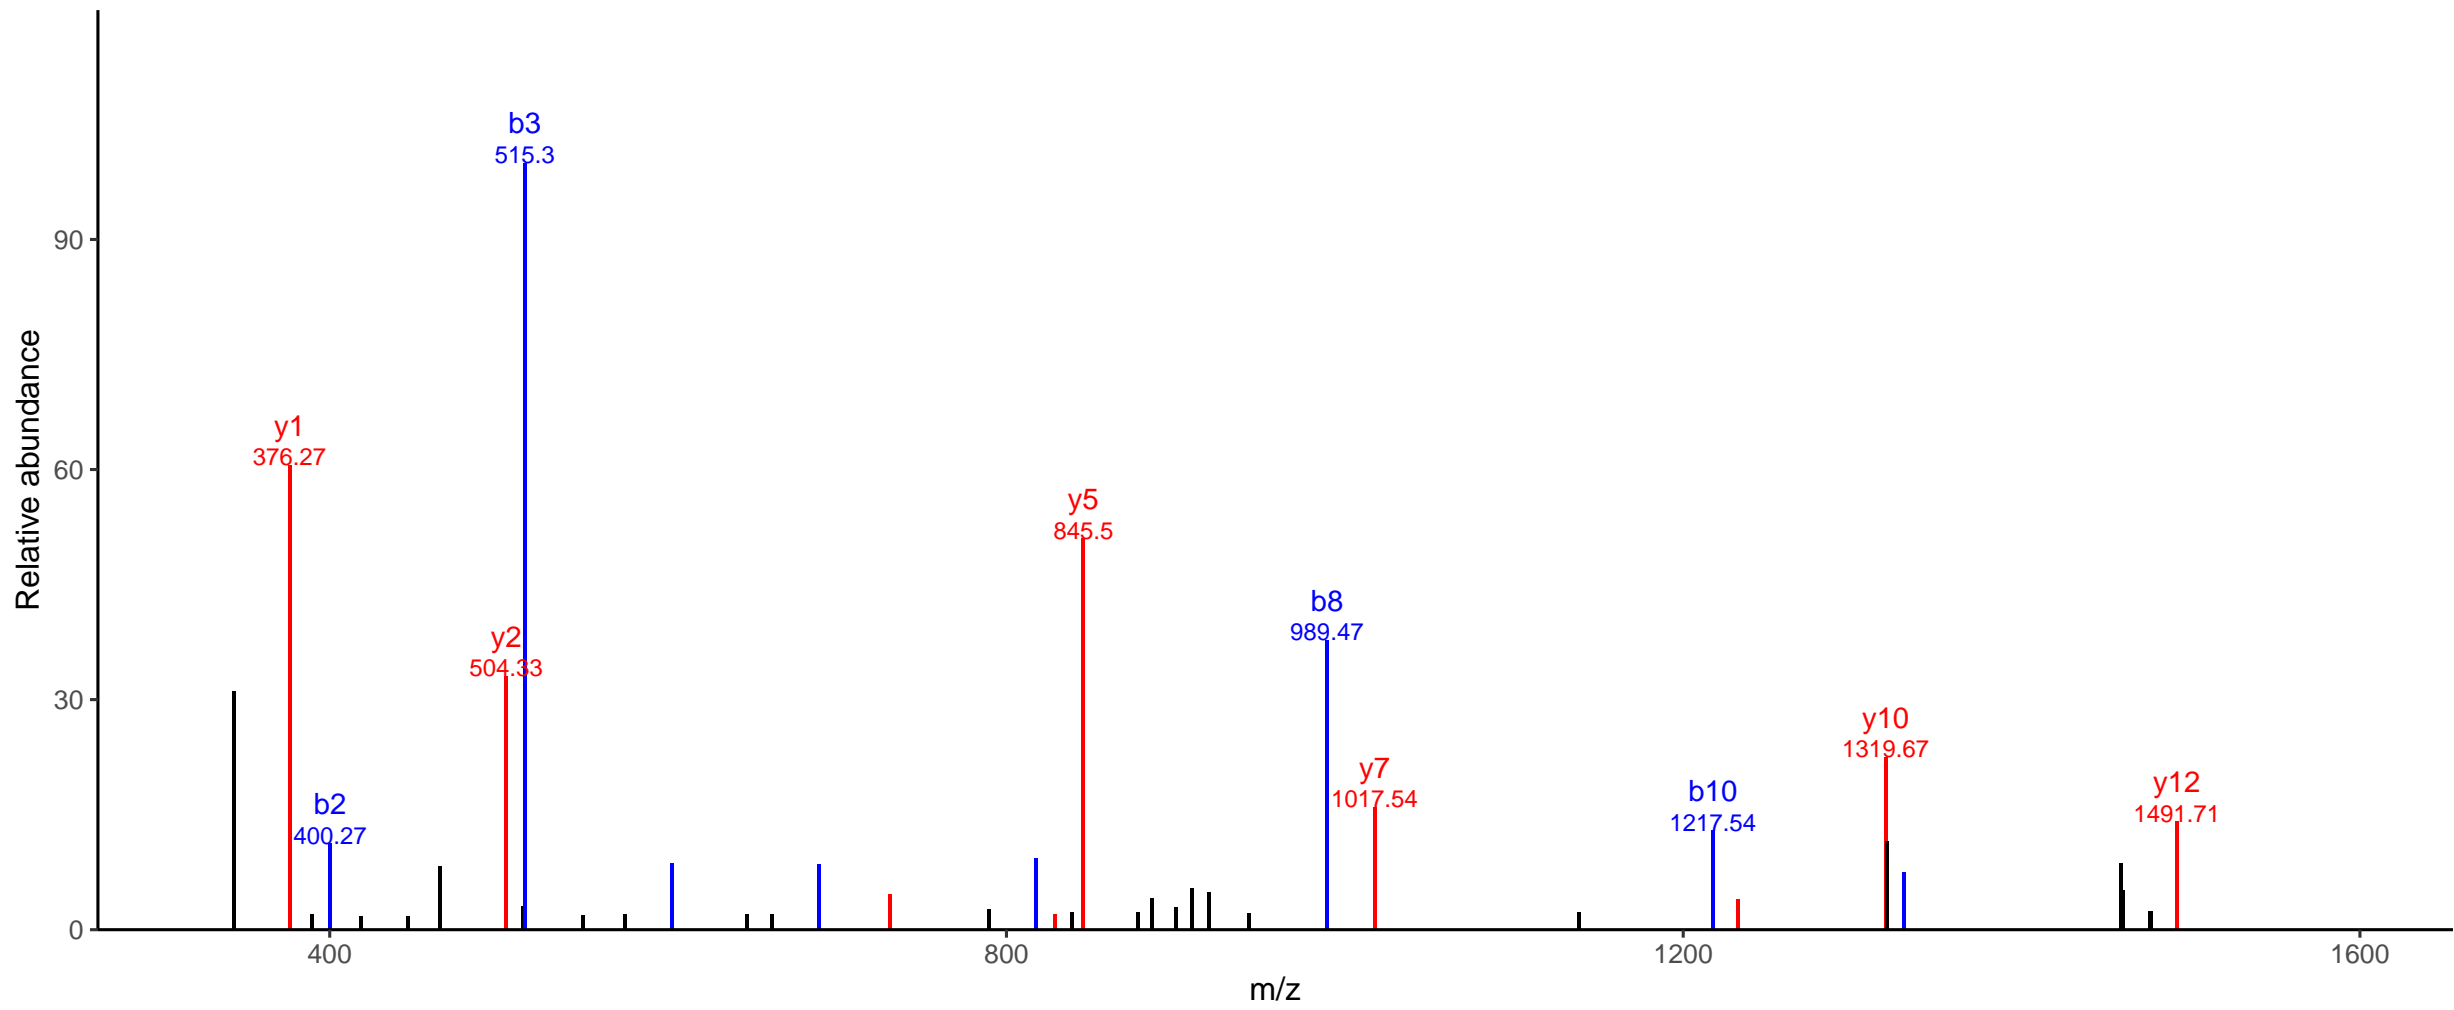

| Raw file  | Scan number | Mass analyzer | Score  | m/z      | Proteins |
|-----------|-------------|---------------|--------|----------|----------|
| 7610TQ_15 | 2149        | FTMS          | 113.71 | 977.4622 | Q12933   |

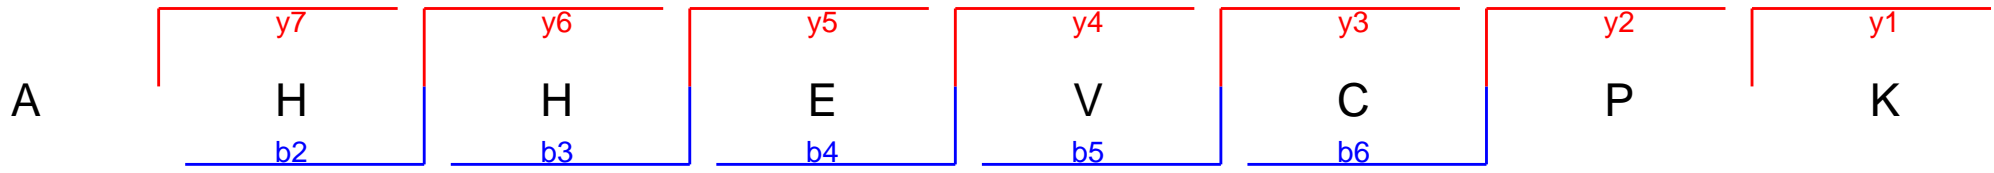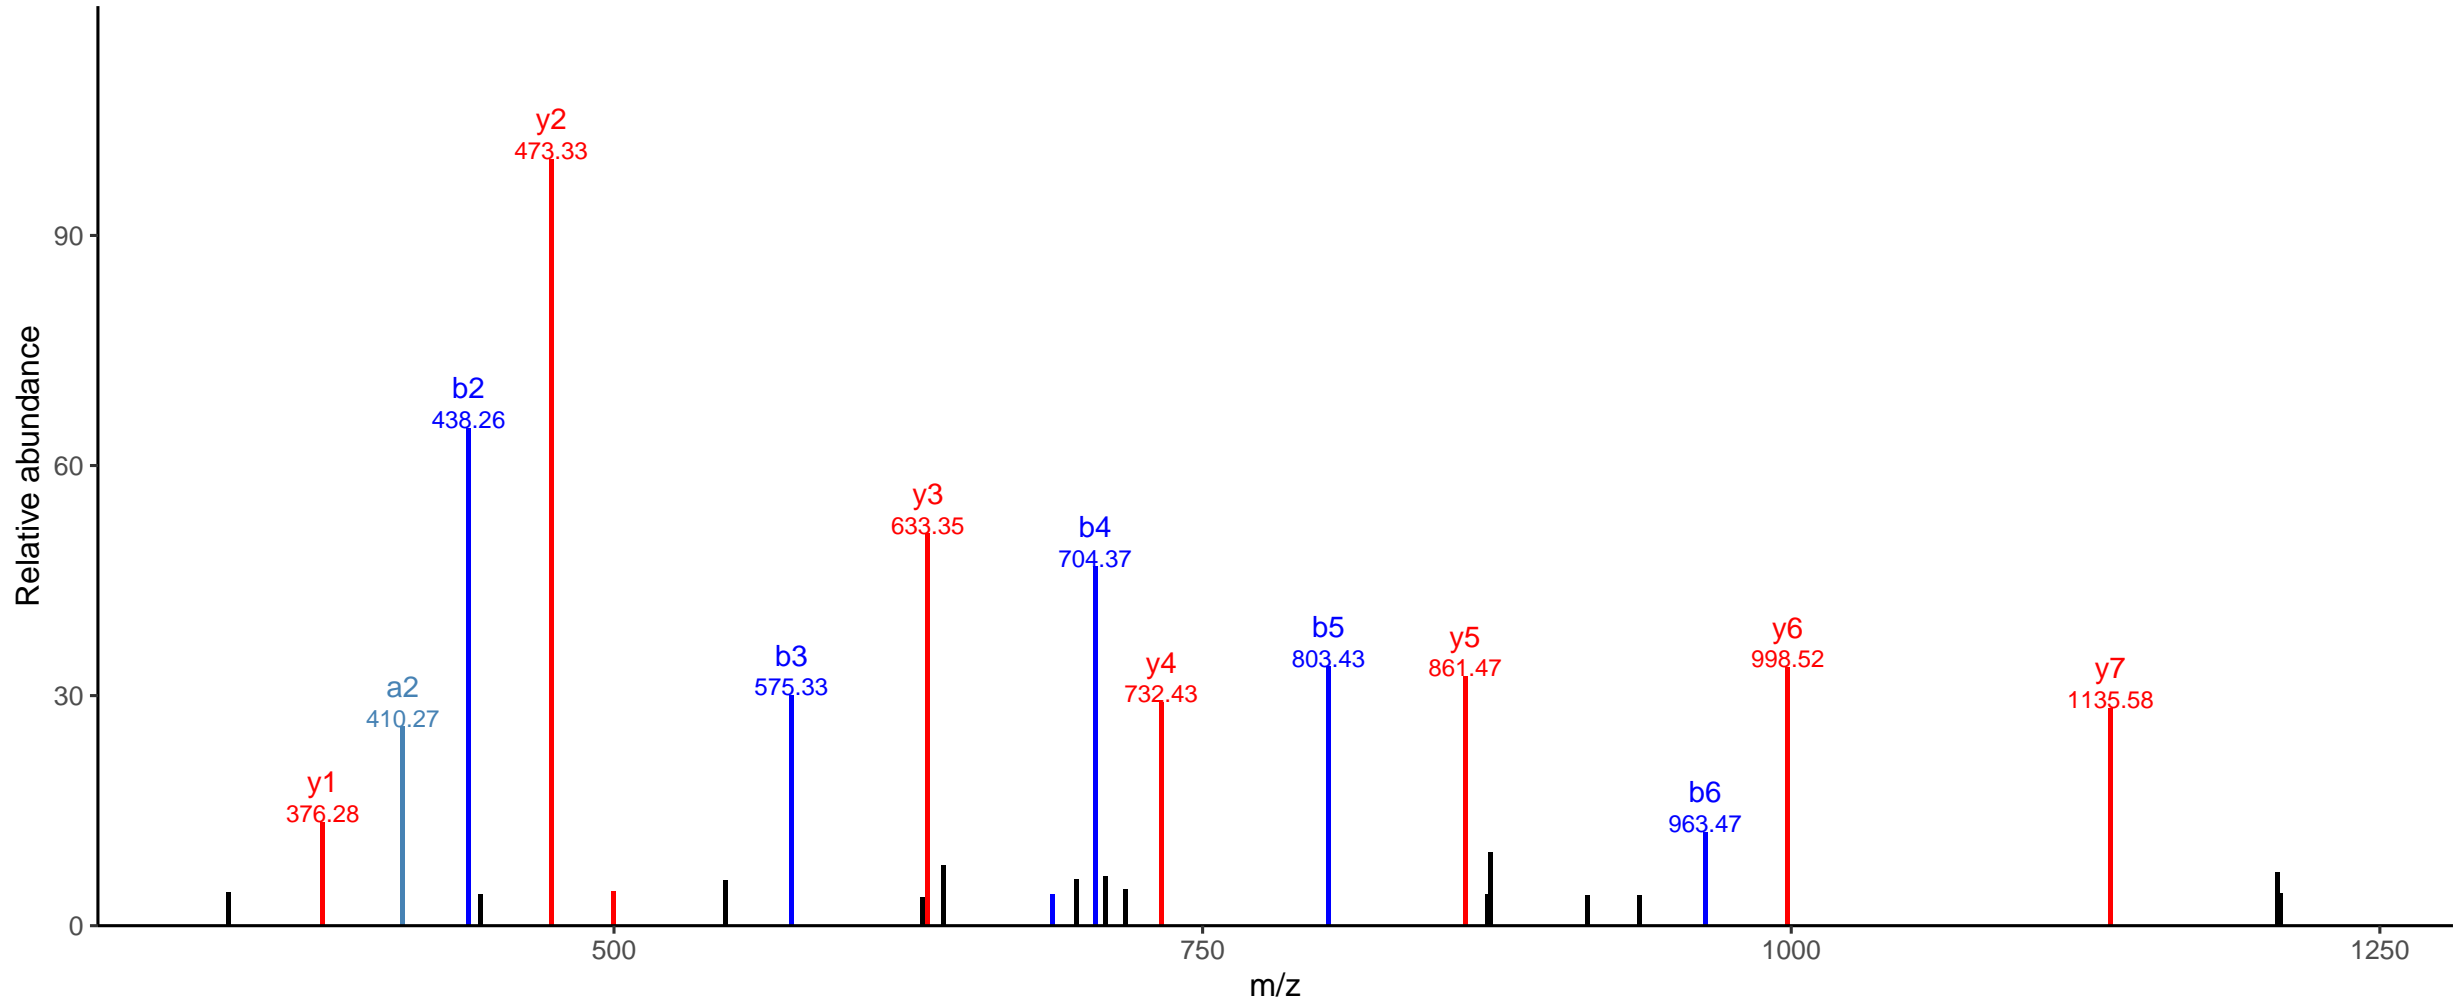

| Raw file  | Scan number | Mass analyzer | Score  | m/z      | Proteins                    |
|-----------|-------------|---------------|--------|----------|-----------------------------|
| 7610TQ_15 | 15431       | FTMS          | 174.59 | 808.4216 | P07437;Q13885;Q9BVA1;Q13509 |

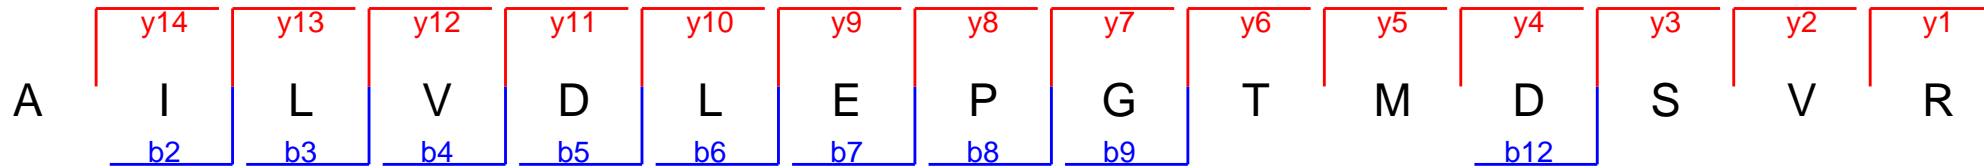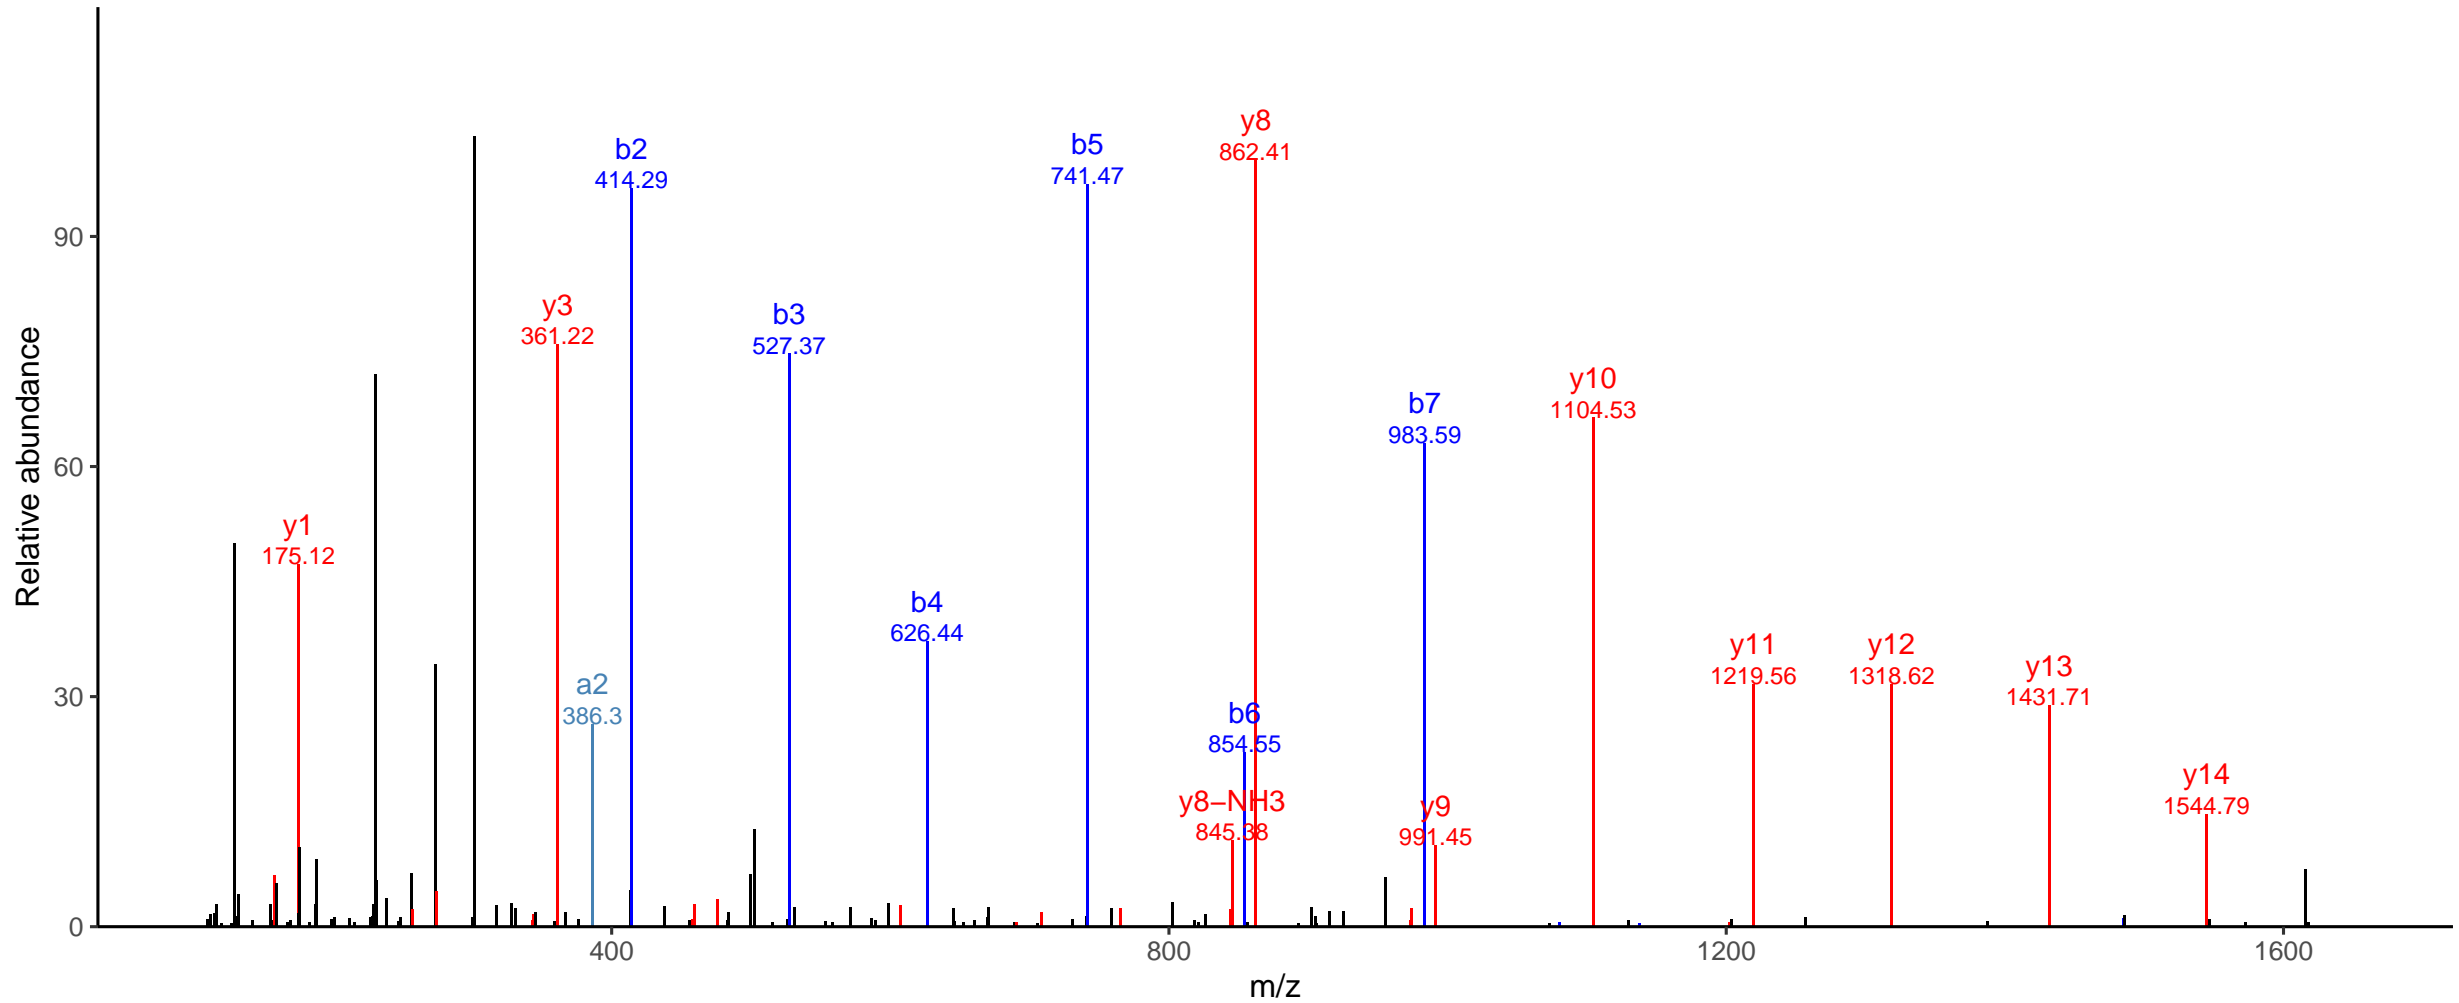

| Raw file  | Scan number | Mass analyzer | Score  | m/z     | Proteins |
|-----------|-------------|---------------|--------|---------|----------|
| 7610TQ_12 | 1340        | FTMS          | 91.783 | 533.746 | Q15118   |

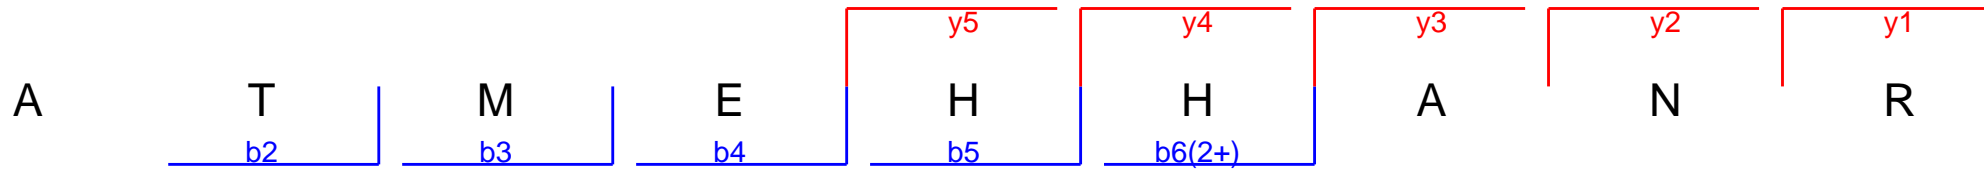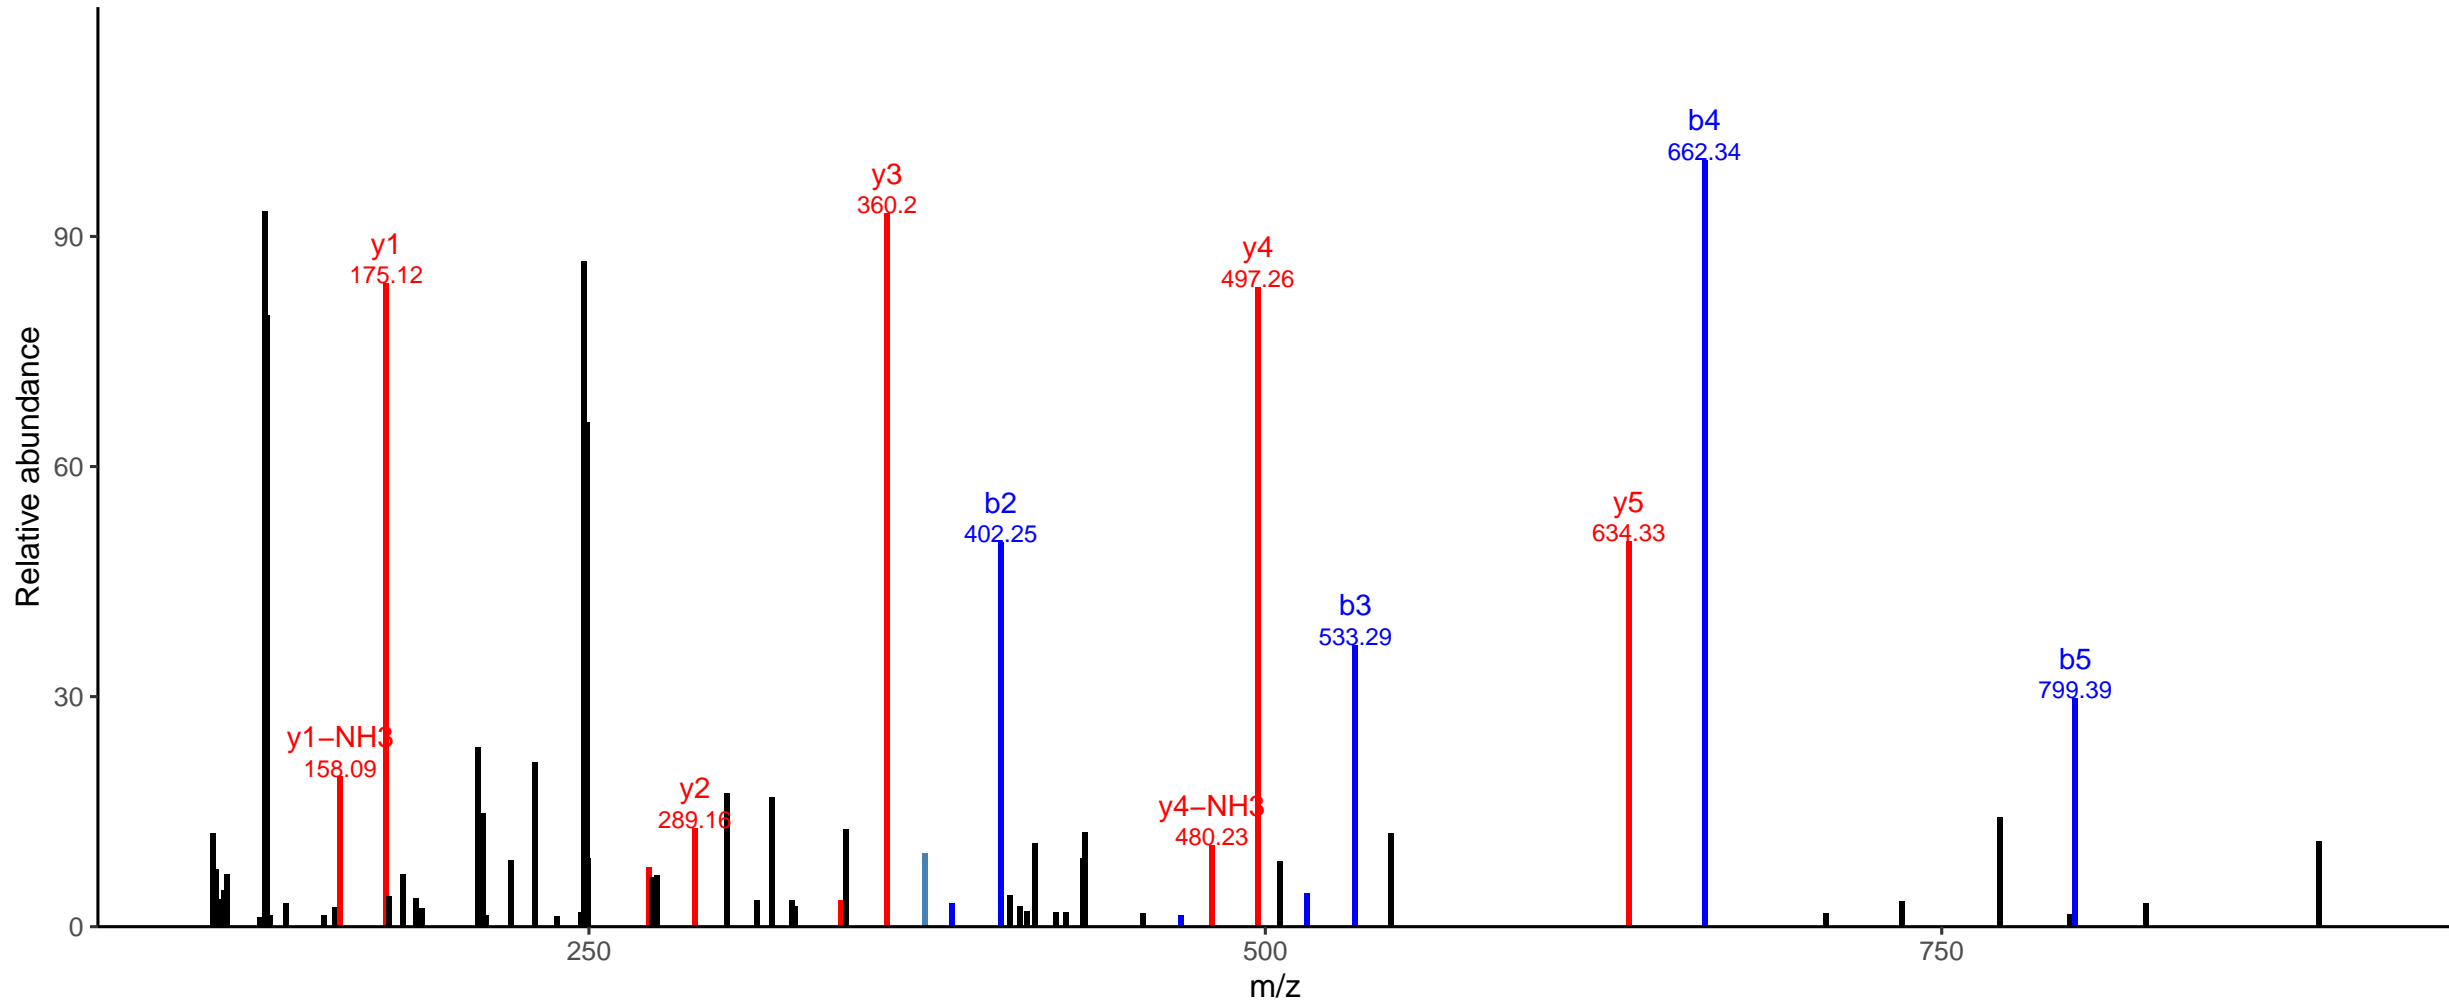

| Raw file | Scan number | Mass analyzer | Score  | m/z      | Proteins |
|----------|-------------|---------------|--------|----------|----------|
| 7610TQ_5 | 3868        | FTMS          | 64.104 | 812.9055 | Q92504   |

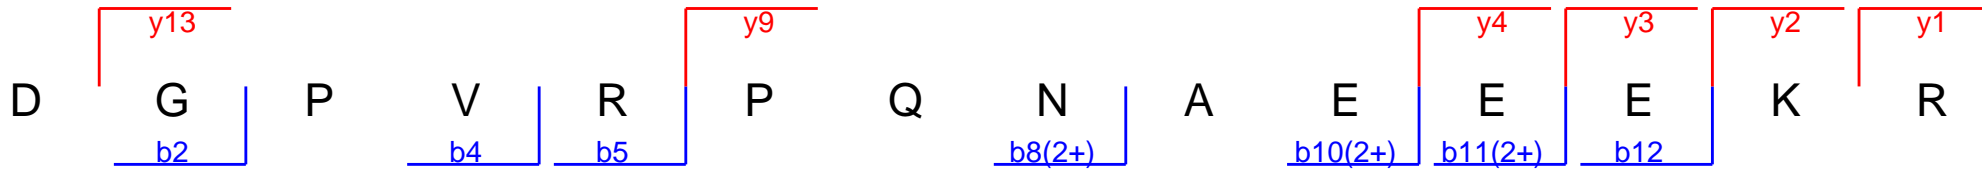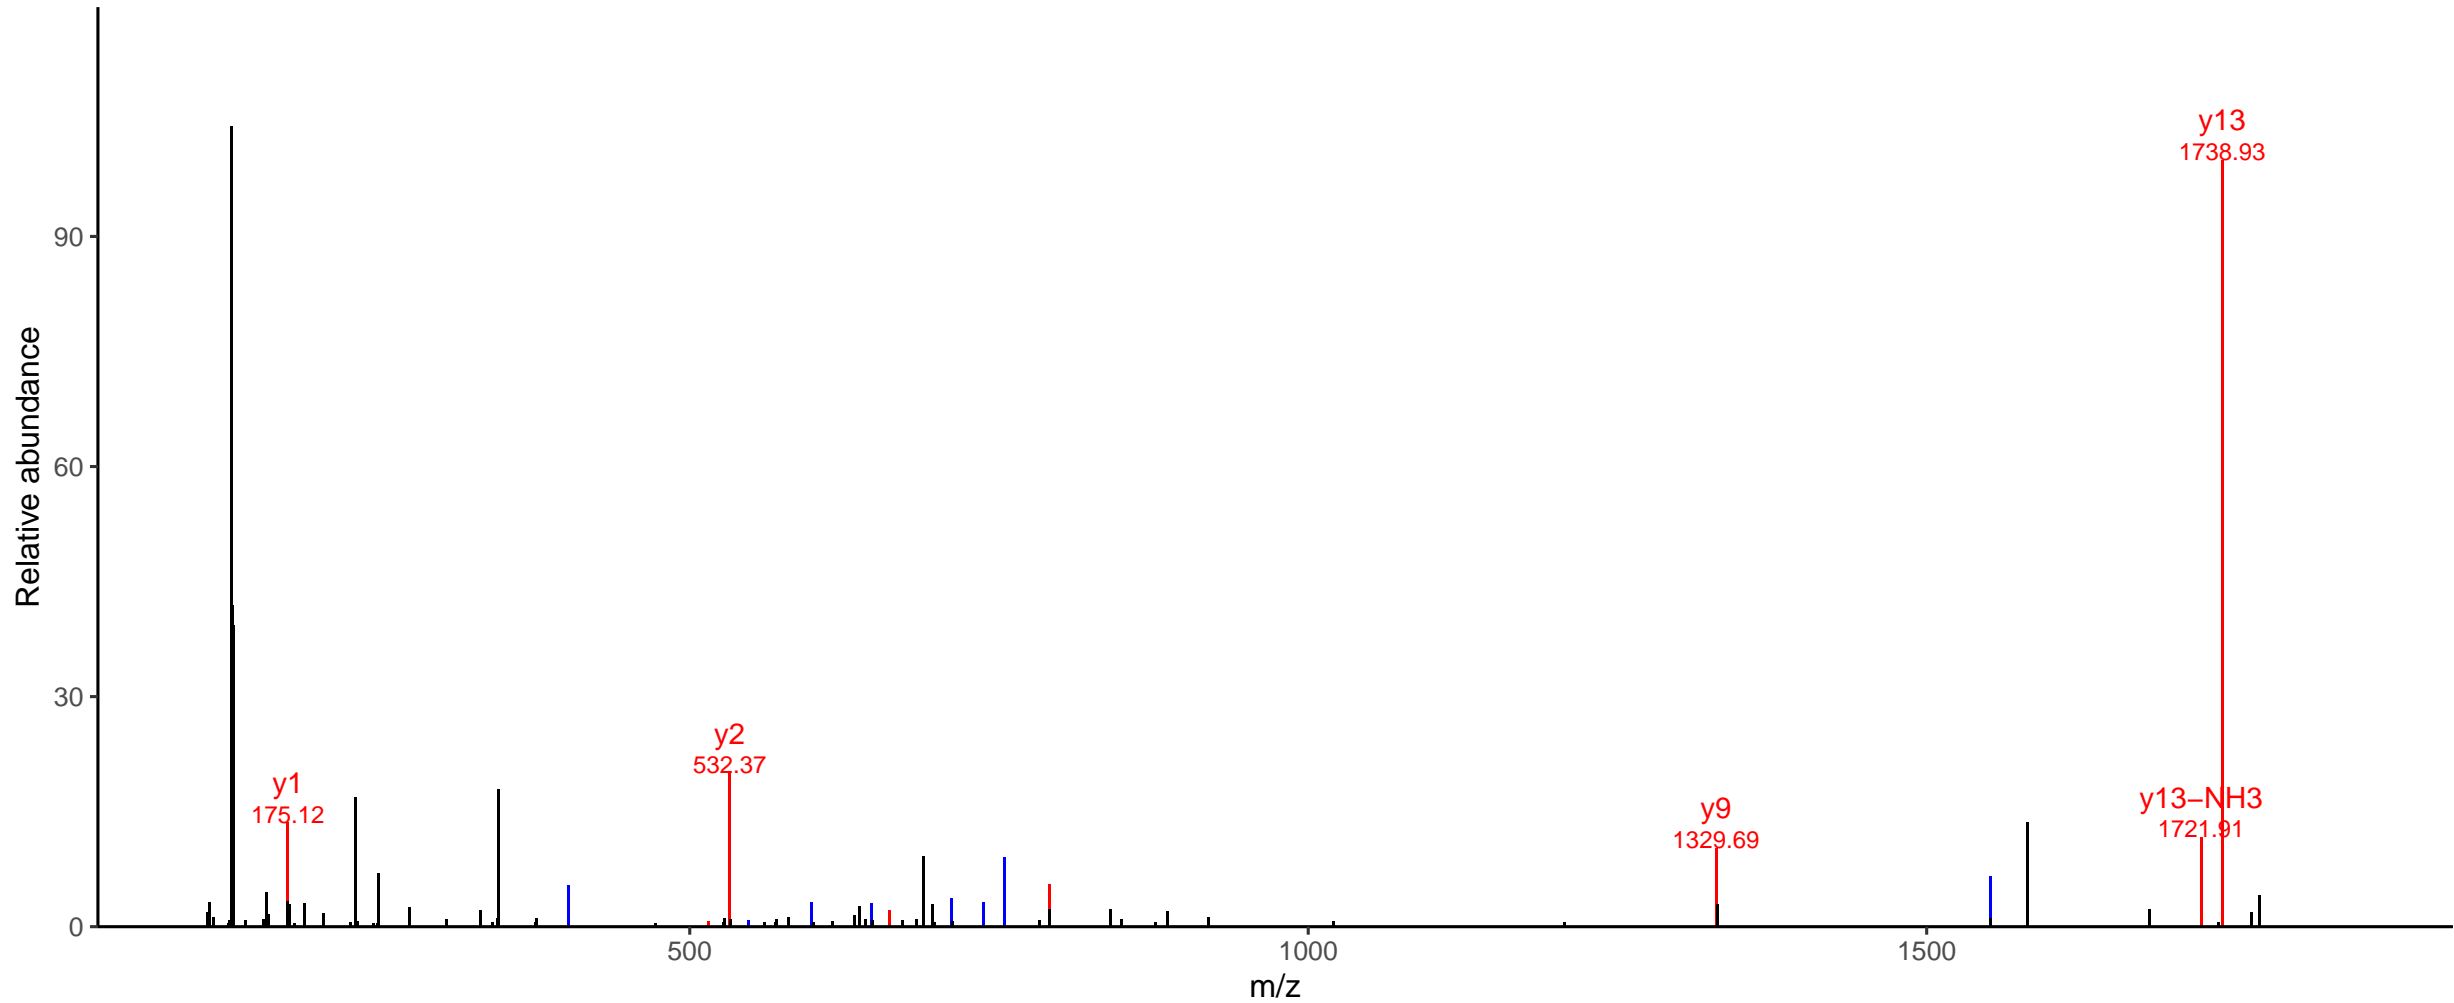

| Raw file  | Scan number | Mass analyzer | Score | m/z      | Proteins |
|-----------|-------------|---------------|-------|----------|----------|
| 7610TQ_11 | 8697        | FTMS          | 122.7 | 1165.548 | Q93045   |

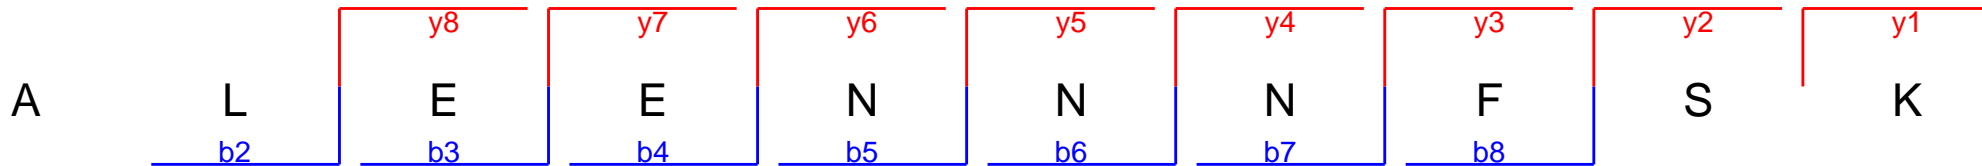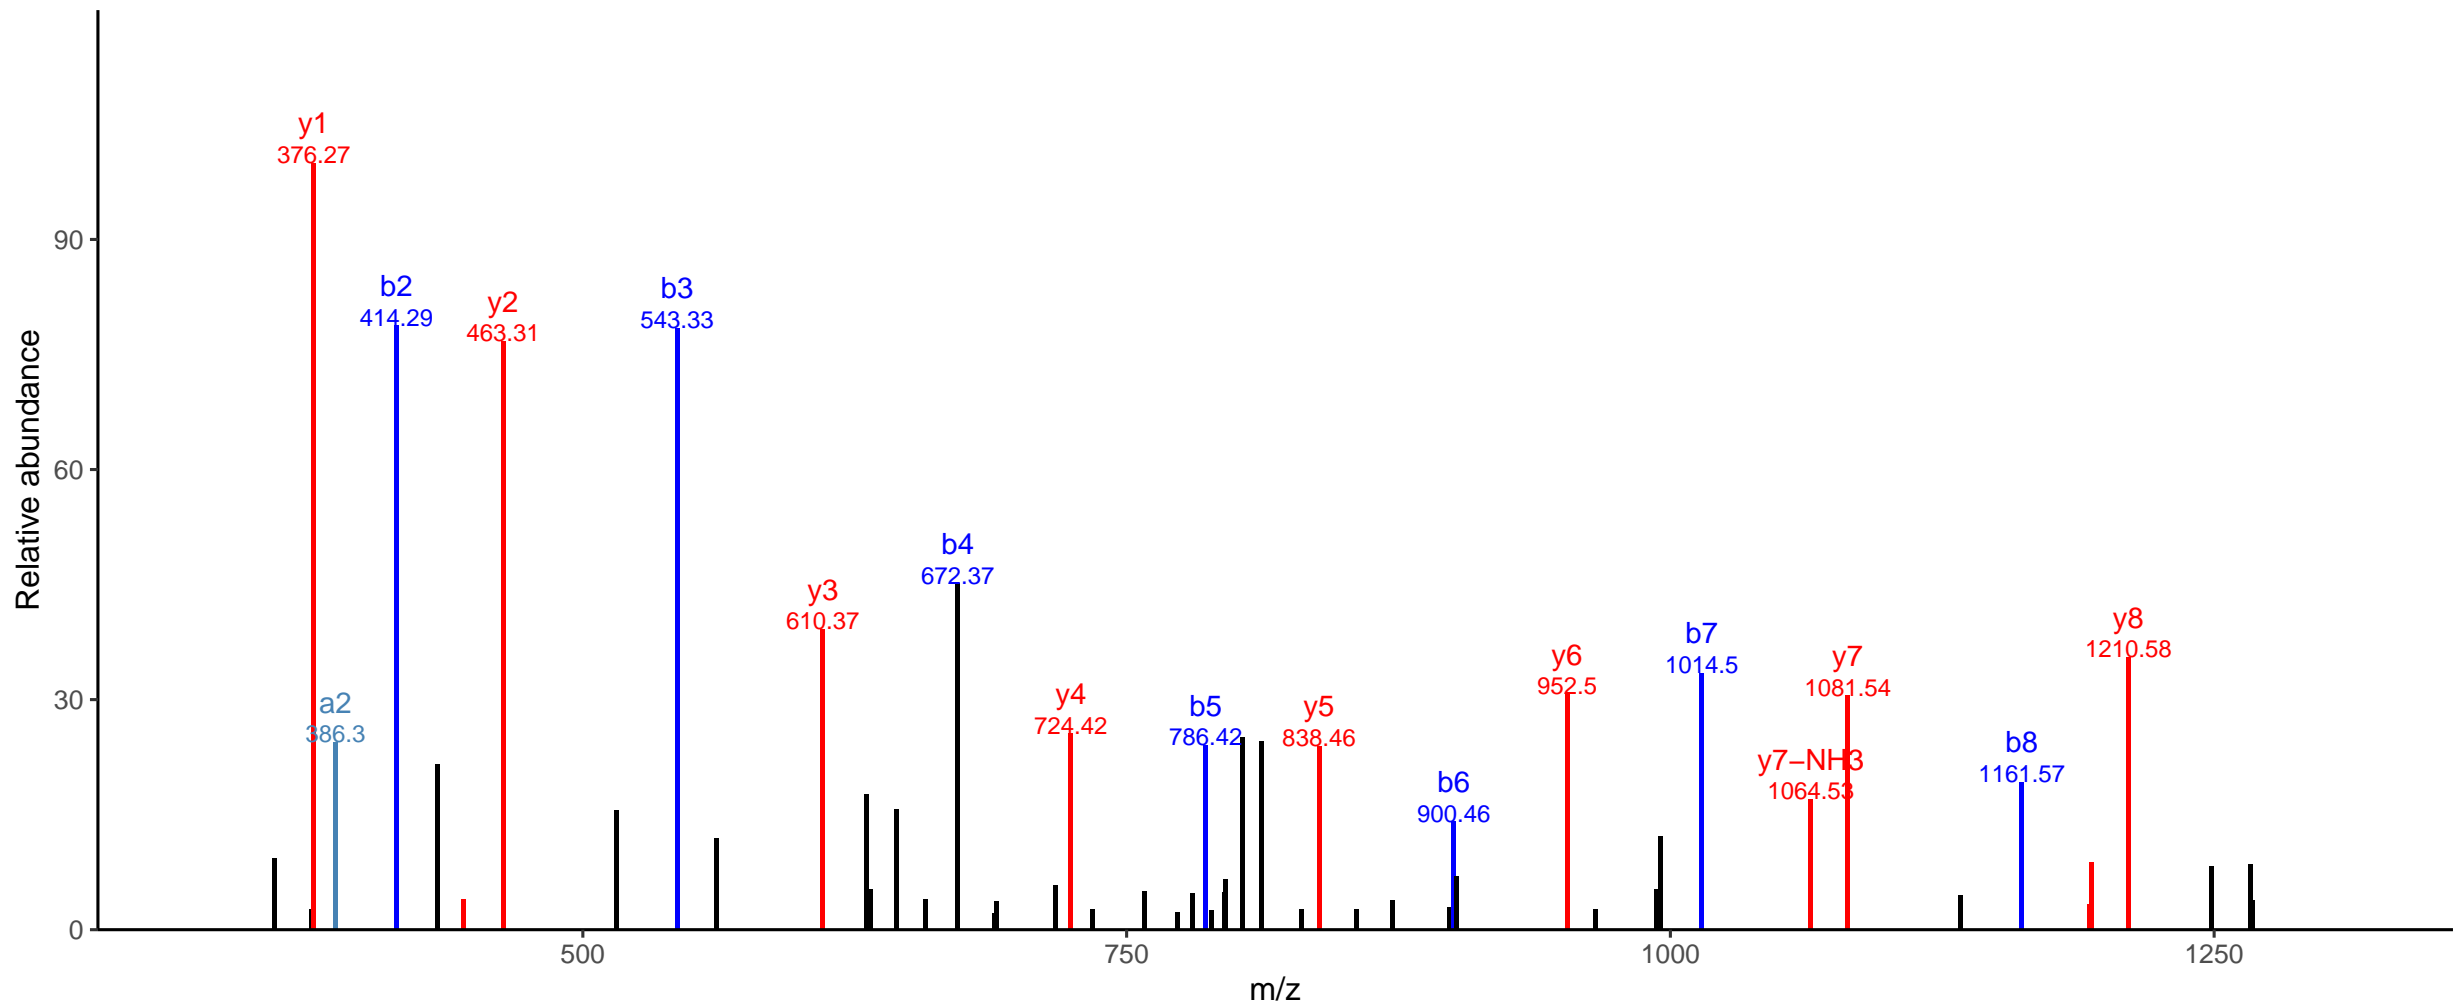

Supplement: mmc2.pdf [file mmc2.pdf]
