# Supplementary material for: Marine bacterial exopolysaccharide EPS11 inhibits migration and invasion of liver cancer cells by directly targeting collagen I
Source: PubMed Central journal article supplement — J Biol Chem. 2021 Aug 28;297(4):101133. doi: 10.1016/j.jbc.2021.101133 (PMC8449266; doi:10.1016/j.jbc.2021.101133), 2021-08-28
Supplement: mmc1.pdf [file mmc1.pdf]

## Supplementary files

### **Marine bacterial exopolysaccharide EPS11 inhibits migration and invasion of liver cancer cells by directly targeting collagen I**

Ge Liu<sup>1,2,4</sup>, Rui Liu<sup>1,2,4</sup>, Yeqi Shan<sup>1,2,3,4</sup>, Chaomin Sun<sup>1,2,3,4\*</sup>

<sup>1</sup>CAS and Shandong Province Key Laboratory of Experimental Marine Biology & Center of Deep Sea Research, Institute of Oceanology, Chinese Academy of Sciences, Qingdao, China

<sup>2</sup>Laboratory for Marine Biology and Biotechnology, Qingdao National Laboratory for Marine Science and Technology, Qingdao, 266071, China

<sup>3</sup>College of Earth Science, University of Chinese Academy of Sciences, Beijing, 100049, China

<sup>4</sup>Center of Ocean Mega-Science, Chinese Academy of Sciences, 266071, Qingdao, China

\*Corresponding author

Chaomin Sun    Tel.: +86 532 82898857; fax: +86 532 82898648.

E-mail address: [sunchaomin@qdio.ac.cn](mailto:sunchaomin@qdio.ac.cn)

## **Supplementary methods**

### **EPS11/membrane floatation assay**

10 dishes of Huh7.5 cells treated with EPS11-FITC were collected, and then lysed with 200 passages in a tight-fitting dounce homogenizer. When cells are over 90% lysed, the cell lysate is spun at 2,500 g for 10 min at 4 °C to pellet cellular debris and nuclei. Transfer the supernatant (referred to as crude lysates, fraction 1) to a fresh tube and then is centrifuged at 20,000 g for 15 min at 4 °C to pellet cellular mitochondria (fraction 2). Collect the supernatant to a fresh tube and then is spun at 10,000 g for 60 min at 4 °C to pellet the membranes (fraction 3). The green fluorescence signals under the 488 nm excitation light of fractions 1, 2 and 3 were finally analyzed using the automatic chemical analyzer (Tanon, 5200F, China).

## Supplementary results

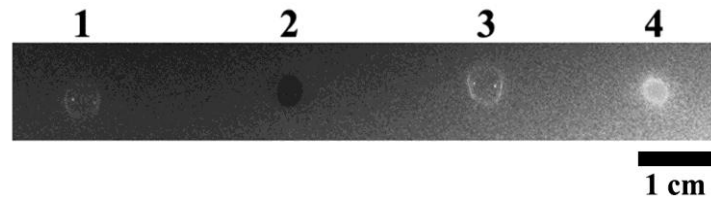

**Supplementary Figure 1. Analysis of co-location between EPS11 and membranes by EPS11/membrane floatation assay.** Lane 1, fraction 1, crude lysates; Lane 2, fraction 2, cellular mitochondria; Lane 3, fraction 3, membranes; Lane 4, EPS11-FITC.

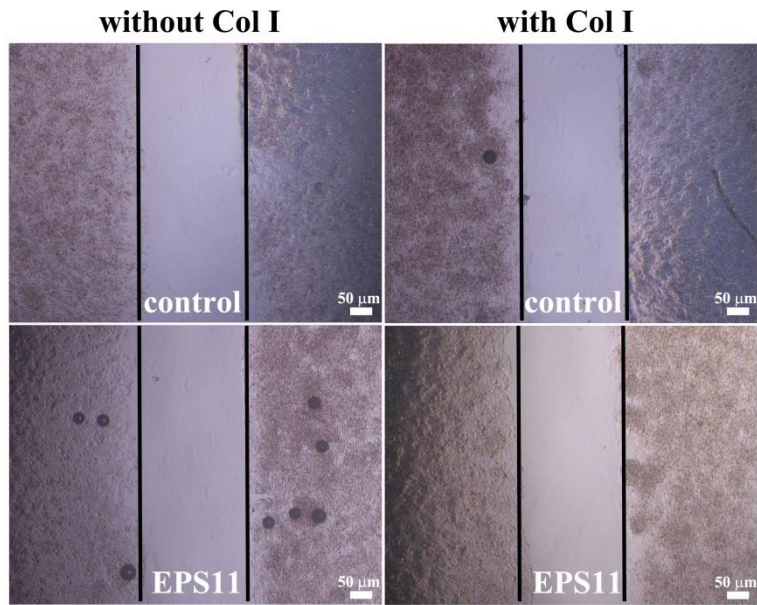

**Supplementary Figure 2.** The initial wounds when time is zero.

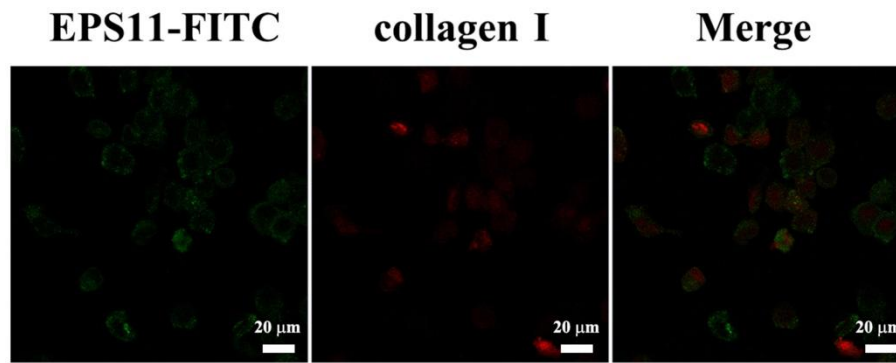

**Supplementary Figure 3. Co-localization of EPS11 and collagen I in Huh7.5 cells using confocal laser scanning microscopy after cells were treated with 0.1 mg/mL EPS11 for 6 h.**
